# Supplementary material for: Gel-free library preparation for next-generation RNA sequencing and small RNA quantification
Source: Research Square preprint supplement (doi:10.21203/rs.3.rs-7256873/v1), 2025-10-08
Supplement: Supplementary file 1 [file 0d3f76152f75b81523bb0ea4.xlsx]

## Sheet: Sheet1
Modification	Position	Normalized Percent Coverage Category
		V1	V2	V3	V4
ac4C	34	Ultra-Low	High	Ultra-Low	High
acp3U	45B	Low	High	Low	High
Cm	32	Low	Low	Ultra-Low	Low
Cm	34	Ultra-Low	Ultra-Low	Ultra-Low	Ultra-Low
cmnm5s2U	34	High	Ultra-High	High	Ultra-High
cmnm5Um	34	Ultra-Low	Ultra-Low	Ultra-Low	Ultra-Low
cmo5U	34	Low	High	High	High
D	16	Low	High	Low	High
D	17	Low	Ultra-High	Low	Ultra-High
D	20	Low	High	Low	High
D	20A	Low	Ultra-High	High	High
D	21	Ultra-High	Ultra-High	Ultra-High	Ultra-High
gluQ	34	High	Ultra-High	Ultra-High	Ultra-High
Gm	18	Low	High	Low	Low
I	34	Ultra-Low	Ultra-High	Ultra-Low	Ultra-High
i6A	37	Ultra-High	Insufficient data	Ultra-High	Ultra-High
k2C	34	Insufficient data	Insufficient data	Insufficient data	Ultra-Low
m1G	37	Ultra-Low	High	Ultra-Low	Ultra-High
m2A	37	High	Ultra-High	High	Ultra-High
m5U	53	Ultra-High	Insufficient data	Insufficient data	Insufficient data
m5U	54	Ultra-High	Ultra-High	Ultra-High	Ultra-High
m6A	37	Ultra-High	Ultra-High	Ultra-High	Ultra-High
m6t6A	37	Ultra-High	Ultra-High	High	Ultra-High
m7G	45A	High	Ultra-High	High	Ultra-High
mnm5s2U	34	Low	Ultra-High	Low	Ultra-High
mnm5U	34	High	Ultra-High	High	Ultra-High
ms2i6A	37	Ultra-Low	Ultra-Low	Ultra-Low	Ultra-Low
Q	34	Low	High	High	High
s2C	32	Ultra-Low	Ultra-High	Low	Ultra-High
s4U	8	Low	High	Low	High
s4U	9	Ultra-High	High	Ultra-High	Ultra-High
s4U	10	Insufficient data	Insufficient data	Ultra-High	Ultra-High
t6A	37	High	Ultra-High	High	Ultra-High
Um	32	High	Ultra-High	Ultra-High	Ultra-High
xC	45N	Ultra-High	Ultra-High	Ultra-High	Ultra-High
Y	13	Ultra-High	Ultra-High	Ultra-High	Ultra-High
Y	32	Ultra-Low	Ultra-Low	Ultra-Low	Ultra-Low
Y	35	Ultra-High	High	Ultra-High	Ultra-High
Y	38	High	Ultra-High	High	Ultra-High
Y	39	High	Ultra-High	High	Ultra-High
Y	40	Ultra-High	Ultra-High	Ultra-High	Ultra-High
Y	54	High	Insufficient data	Insufficient data	Insufficient data
Y	55	Ultra-High	Ultra-High	Ultra-High	Ultra-High
Y	65	High	Ultra-High	High	High
