# Supplementary material for: Gel-free library preparation for next-generation RNA sequencing and small RNA quantification
Source: Research Square preprint supplement (doi:10.21203/rs.3.rs-7256873/v1), 2025-10-08
Supplement: Supplementary file 2 [file 18ce2b098fbe1fc028e84b1c.xlsx]

## Sheet: Sheet1
Protocol	EMM of Position-Specific Percent Coverage	Degree of Freedom	Lower Confident Limit	Upper Confident Limit	Compact Letter from Pairwise Comparison
Position 8
V1	0.0809521	191	0.0430737	0.11883	a
V2	0.465473	191	0.430775	0.500171	b
V3	0.168738	191	0.132534	0.204941	c
V4	0.513269	191	0.484969	0.541569	b
Position 13
V1	0.330775	6	0.270624	0.390926	a
V2	0.795725	6	0.735574	0.855877	b
V3	0.537649	6	0.477498	0.5978	c
V4	0.860539	6	0.800387	0.92069	b
Position 16
V1	0.159602	154	0.11834	0.200864	a
V2	0.582203	154	0.546854	0.617551	b
V3	0.216847	154	0.17619	0.257504	a
V4	0.649815	154	0.615706	0.683923	c
Position 17
V1	0.249642	173	0.209955	0.289329	a
V2	0.701052	173	0.664222	0.737881	b
V3	0.31264	173	0.272753	0.352526	a
V4	0.766229	173	0.730464	0.801994	b
Position 18
V1	-0.00724764	90	-0.0711089	0.0566136	a
V2	0.364808	90	0.311753	0.417863	b
V3	0.0803446	90	0.0182474	0.142442	a
V4	0.46363	90	0.423625	0.503636	c
Position 20
V1	0.191181	241	0.157458	0.224905	a
V2	0.554161	241	0.522312	0.586009	b
V3	0.274925	241	0.243547	0.306302	c
V4	0.61579	241	0.589052	0.642528	d
Position 20A
V1	0.145381	82	0.0683866	0.222376	a
V2	0.601329	82	0.528632	0.674026	b
V3	0.241291	82	0.165696	0.316885	a
V4	0.639845	82	0.586176	0.693514	b
Position 32
V1	0.0923807	109	0.0316242	0.153137	a
V2	0.424488	109	0.370873	0.478102	b
V3	0.158558	109	0.104119	0.212997	a
V4	0.490239	109	0.44702	0.533458	b
Position 34
V1	0.217113	174	0.178014	0.256211	a
V2	0.56639	174	0.530905	0.601875	b
V3	0.276095	174	0.236996	0.315193	a
V4	0.638957	174	0.607402	0.670512	c
Position 37
V1	0.302914	291	0.270171	0.335656	a
V2	0.622553	291	0.590864	0.654241	b
V3	0.374158	291	0.342654	0.405662	c
V4	0.68509	291	0.657041	0.713139	d
Position 38
V1	0.551011	59	0.494308	0.607715	a
V2	0.752446	59	0.695743	0.809149	b
V3	0.602068	59	0.54716	0.656976	a
V4	0.910197	59	0.855289	0.965105	c
Position 39
V1	0.532879	118	0.479446	0.586312	a
V2	0.887016	118	0.837392	0.936639	b
V3	0.55978	118	0.50501	0.61455	a
V4	0.888479	118	0.838855	0.938102	b
Position 40
V1	0.741653	28	0.699797	0.783508	a
V2	0.902778	28	0.860923	0.944633	b
V3	0.794409	28	0.752554	0.836264	a
V4	0.953388	28	0.911533	0.995243	b
Position 45A
V1	0.599867	222	0.55542	0.644314	a
V2	0.918777	222	0.875595	0.96196	b
V3	0.651408	222	0.605588	0.697228	a
V4	0.949881	222	0.907272	0.992491	b
Position 45B
V1	0.244166	78	0.161124	0.327207	a
V2	0.518183	78	0.439615	0.596751	b
V3	0.269877	78	0.183685	0.356068	a
V4	0.510193	78	0.431625	0.58876	b
Position 45N
V1	0.810648	6	0.786124	0.835171	a
V2	0.97135	6	0.946827	0.995873	b
V3	0.889345	6	0.864821	0.913868	c
V4	0.992025	6	0.967502	1.01655	b
Position 54
V1	0.930812	438	0.925792	0.935833	a
V2	0.963218	438	0.957894	0.968542	b
V3	0.937115	438	0.931979	0.942251	a
V4	0.977034	438	0.971898	0.98217	c
Position 55
V1	0.918277	438	0.912932	0.923622	a
V2	0.952754	438	0.947202	0.958306	b
V3	0.928313	438	0.922969	0.933658	c
V4	0.961767	438	0.956422	0.967112	b
Position 65
V1	0.6027	13	0.558698	0.646703	a
V2	0.557818	13	0.490214	0.625423	a
V3	0.557709	13	0.513706	0.601711	a
V4	0.513454	13	0.464372	0.562536	a
