# Supplementary material for: Gel-free library preparation for next-generation RNA sequencing and small RNA quantification
Source: Research Square preprint supplement (doi:10.21203/rs.3.rs-7256873/v1), 2025-10-08
Supplement: Supplementary file 3 [file 38e44550fa1a40983e8e10ee.xlsx]

## Sheet: Sheet1
Subject ID	Biological Replicate A				Biological Replicate B				Biological Replicate C
	V1	V2	V3	V4	V1	V2	V3	V4	V1	V2	V3	V4
	D23-12986	D23-12987	D23-12988	D23-12989	D23-12990	D23-12991	D23-12992	D23-12993	D23-12994	D23-12995	D23-12996	D23-12997
80mer_40GC (Internal Standard / Positive Control)	474854	82212	253700	144463	93694	29551	136805	250393	179856	63779	206724	46496
80mer_60GC (Negative Control)	0	0	1	0	0	0	0	0	0	0	0	0
Ala-GGC-1	36062	4248	22789	26238	5238	1224	9853	24537	11162	3920	12594	6232
Ala-TGC-1	35889	3250	19966	11766	4869	978	8922	12358	8451	2120	10292	2570
Arg-ACG-1	170900	15256	100111	68395	26568	6092	43406	69958	52326	16380	40490	26082
Arg-CCG-1	1066	280	480	765	126	74	169	892	233	166	165	206
Arg-CCT-1	1828	197	1931	2238	282	98	770	1876	691	293	879	597
Arg-TCT-1	9361	1114	5460	6517	1290	476	2287	8046	2136	1096	1868	1891
Asn-GTT-1	91212	10242	73316	77998	10326	3607	24808	89156	23589	9060	35664	15474
Asp-GTC-1	80425	8470	55440	62733	10040	3895	20836	63142	19967	8909	23006	14953
Cys-GCA-1	18404	3627	9516	7780	2596	718	4220	10208	4963	1504	6086	1622
fMet-CAT-1	12882	800	12978	4471	1890	384	4900	5366	4848	866	5387	1346
fMet-CAT-2	5653	298	5219	1210	1054	124	2398	1425	2371	276	3286	356
Gln-CTG-1	40880	3357	29493	25804	5449	1223	12097	29223	11106	3212	18612	5770
Gln-TTG-1	45428	4118	31686	31094	5818	1492	13910	37930	11806	3736	17582	7420
Glu-TTC-1	32750	4919	23682	21250	3784	1341	9645	25814	6842	3380	8736	5424
Gly-CCC-1	3386	244	2970	676	359	74	1022	916	592	152	828	188
Gly-GCC-1	98764	14044	78787	80588	13078	3886	30192	101693	23723	10409	27097	18889
Gly-TCC-1	12588	1877	7813	6545	877	514	1854	8256	1289	1020	944	1537
His-GTG-1	44092	3130	26452	14608	6164	971	12751	22467	13080	3024	18318	4818
Ile-GAT-1	7575	8587	5617	82223	899	4042	1623	97683	2380	11230	1650	22022
Ile2-CAT-1	3648	2450	2367	6691	618	631	826	6986	919	1694	720	1910
Ile2-CAT-2	28	12	20	6	6	3	6	8	9	8	5	7
Leu-CAA-1	27846	4720	17775	19405	4160	1352	7515	25494	9610	3497	7743	5600
Leu-CAG-1	64686	3695	43456	41509	9702	1458	16292	44664	19538	4352	26949	10309
Leu-CAG-2	14476	1004	8139	4948	1833	209	3478	4019	3194	414	4659	782
Leu-GAG-1	5813	793	3095	2944	720	158	1006	3747	1051	334	1564	590
Leu-TAA-1	17278	7363	8988	20999	1847	1542	3175	26487	4120	3656	4127	5196
Leu-TAG-1	16362	894	9258	4470	2405	325	3944	7224	3845	796	5485	1358
Lys-TTT-1	190202	10512	88818	27796	29218	5007	39971	35747	53519	15140	36694	12470
Met-CAT-1	83641	3926	43785	5415	13125	1506	19272	7330	26992	3535	20678	2347
Phe-GAA-1	53252	13397	23663	7676	7910	3179	9216	13607	13751	8847	8800	4320
Phe-GAA-2	11131	2150	5219	1221	1904	558	2284	1967	3364	1199	3450	531
Pro-CGG-1	38471	1891	26581	6862	7174	798	11785	9933	15882	1670	22601	1956
Pro-GGG-1	5266	625	2284	1754	622	125	870	2714	1154	282	1252	554
Pro-TGG-1	54925	6861	35201	34640	8526	2366	16109	40724	18023	6525	19855	11584
SeC-TCA-1	399	36	529	194	53	15	172	317	107	31	260	81
Ser-CGA-1	1740	276	1094	1143	154	37	370	973	321	100	457	200
Ser-GCT-1	7212	424	4108	2881	564	76	1214	2162	886	145	785	286
Ser-GGA-1	16969	1331	12770	17266	1618	505	4482	14818	3272	1161	3822	2808
Ser-TGA-1	1083	196	903	1095	181	76	406	1242	364	163	402	222
Thr-CGT-1	7707	818	7125	1569	1286	308	3324	2411	2973	772	3800	858
Thr-CGT-2	2836	313	1448	216	490	114	1022	518	776	185	1402	80
Thr-GGT-1	26022	3004	19141	19686	4906	1249	9460	26402	9625	3850	11988	6322
Thr-GGT-2	10598	1064	6338	4086	2379	308	3794	5655	3712	828	5518	1524
Thr-TGT-1	31359	3715	23349	13442	5428	1513	11140	18608	10172	4099	11563	6421
Trp-CCA-1	32824	7227	20284	21851	4580	1576	8274	21778	8952	3588	10560	4561
Tyr-GTA-1	32891	4376	18139	14550	4051	1109	8168	19970	8658	2948	7928	4956
Tyr-GTA-2	31639	4212	18051	13480	3625	1002	7713	19011	8004	2734	7815	4424
Val-GAC-1	3558	1702	2265	7758	429	574	762	10193	917	1757	803	2718
Val-GAC-2	26496	1569	13166	8628	4537	670	5684	11472	9166	1953	8028	3232
Val-TAC-1	59889	5999	48200	39007	10133	2496	24510	51836	23614	8013	30676	14080
Total	2104246	266825	1282966	1030550	328585	91609	568712	1299356	647901	228808	710597	296180
