# Supplementary material for: Gel-free library preparation for next-generation RNA sequencing and small RNA quantification
Source: Research Square preprint supplement (doi:10.21203/rs.3.rs-7256873/v1), 2025-10-08
Supplement: Supplementary file 4 [file 555dd0443225ad54467f8b39.xlsx]

## Sheet: Sheet1
tRNA Isoacceptor	% tRNA Pool
	V1	V2	V3	V4	Quantitative Northern Blotting
Ala-GGC	2.27688	2.21565	2.33054	2.60049	0.953911
Ala-TGC	2.02401	1.53854	2.01606	1.17834	5.06075
Arg-ACG	11.0046	9.34381	9.27985	8.29043	7.40034
Arg-CCG	0.0560924	0.12361	0.0395385	0.084621	0.994076
Arg-CCT	0.126856	0.147716	0.180137	0.223825	0.652676
Arg-TCT	0.525935	0.678763	0.477646	0.7532	1.34552
Asn-GTT	4.99618	5.61717	6.64307	7.82758	1.85762
Asp-GTC	4.48228	5.42736	4.92706	6.36486	3.73531
Cys-GCA	1.09781	1.33937	1.03537	0.832522	2.47013
Gln-CTG	2.39794	1.91255	3.1159	2.66864	1.3656
Gln-TTG	2.59137	2.30007	3.26147	3.36365	1.18486
Glu-TTC	1.68774	2.28819	2.09163	2.3429	7.35014
Gly-CCC_Gly-TCC	0.628933	0.93379	0.690135	0.792776	3.32363
Gly-GCC	5.55654	6.71854	6.68226	8.77785	6.78783
His-GTG	2.70777	1.69757	3.04911	1.90506	0.994076
Ile-GAT_Ile2-CAT	0.681503	7.12771	0.606401	9.86638	5.41219
Leu-CAA	1.84648	2.28261	1.66881	2.28671	2.98223
Leu-CAG	4.87587	2.70781	5.28013	4.77609	6.96857
Leu-GAG	0.294867	0.294442	0.281026	0.308206	1.46601
Leu-TAA	0.905328	2.88747	0.808844	2.32379	1.60659
Leu-TAG	0.949316	0.496858	0.966241	0.578227	1.03424
Lys-TTT	11.8561	7.66114	8.39748	3.85006	2.98223
Met-CAT	5.50342	2.23258	4.27482	0.750425	1.09449
Phe-GAA	3.92993	6.83106	2.63447	1.47742	1.60659
Pro-CGG	2.9478	1.10799	3.25723	0.834105	1.38568
Pro-GGG	0.277246	0.23614	0.223733	0.225958	1.11457
Pro-TGG	3.62185	3.82852	3.69554	4.1458	0.903705
SeC-TCA	0.0232769	0.020828	0.0475598	0.0281733	0.3414
Ser-CGA	0.0797146	0.089435	0.094209	0.100661	0.532182
Ser-GCT	0.287477	0.146003	0.279332	0.215271	2.18897
Ser-GGA	0.804613	0.746256	1.01376	1.49564	1.18486
Ser-TGA	0.073924	0.109154	0.0872339	0.110229	2.01827
Thr-CGT	0.736507	0.624252	0.956943	0.285544	0.843458
Thr-GGT	2.74439	2.51824	3.00384	2.95985	1.86766
Thr-TGT	2.14139	2.31376	2.38197	1.9558	1.42585
Trp-CCA	1.95788	2.86785	1.99326	2.12312	1.46601
Tyr-GTA	3.58703	3.82572	3.44161	3.54434	3.15293
Val-GAC	2.0418	2.01008	1.58023	2.09961	1.95803
Val-TAC	4.35732	4.04878	5.47931	4.99504	5.98454
fMet-CAT	1.31398	0.702605	1.72622	0.656811	3.00231
