# Supplementary material for: Gel-free library preparation for next-generation RNA sequencing and small RNA quantification
Source: Research Square preprint supplement (doi:10.21203/rs.3.rs-7256873/v1), 2025-10-08
Supplement: Supplementary file 5 [file 5efc88d499655ea052e9b40a.xlsx]

## Sheet: Sheet1
Protocol	tRNA ID (Modomics)	tRNA ID (Reference Sequence Library)	Standardized Position (Absolute)	Standardized Position (Annotated)	Original Position on tRNA	Number of Samples	Mean of Percent Identity	Standard Deviation of Percent Identity	Mean of Percent Coverage	Standard Deviation of Percent Coverage	Modification (Short Name)
V1	2_tRNA_Ala	Ala-GGC-1	1	0	NA	NA	NA	NA	NA	NA	NA
V1	2_tRNA_Ala	Ala-GGC-1	2	1	1	3	1	0	0.443964	0.0728146	NA
V1	2_tRNA_Ala	Ala-GGC-1	3	2	2	3	1	0	0.449164	0.0746823	NA
V1	2_tRNA_Ala	Ala-GGC-1	4	3	3	3	0.999231	0.000732103	0.452079	0.0744434	NA
V1	2_tRNA_Ala	Ala-GGC-1	5	4	4	3	0.9995	0.000508062	0.453464	0.0741036	NA
V1	2_tRNA_Ala	Ala-GGC-1	6	5	5	3	0.997259	0.00238446	0.454663	0.0736805	NA
V1	2_tRNA_Ala	Ala-GGC-1	7	6	6	3	0.989007	0.00959283	0.449373	0.0726049	NA
V1	2_tRNA_Ala	Ala-GGC-1	8	7	7	3	0.990226	0.00867486	0.453804	0.0718934	NA
V1	2_tRNA_Ala	Ala-GGC-1	9	8	8	3	0.977249	0.0197028	0.466716	0.0738519	NA
V1	2_tRNA_Ala	Ala-GGC-1	10	9	9	3	0.999739	0.000451549	0.493791	0.0774952	NA
V1	2_tRNA_Ala	Ala-GGC-1	11	10	10	3	0.999159	0.000837799	0.508946	0.0779382	NA
V1	2_tRNA_Ala	Ala-GGC-1	12	11	11	3	0.999032	0.000871653	0.511714	0.078549	NA
V1	2_tRNA_Ala	Ala-GGC-1	13	12	12	3	0.999367	0.000558868	0.513428	0.0783294	NA
V1	2_tRNA_Ala	Ala-GGC-1	14	13	13	3	0.996887	0.00284314	0.515834	0.077431	NA
V1	2_tRNA_Ala	Ala-GGC-1	15	14	14	3	0.999423	0.000500674	0.518972	0.076921	NA
V1	2_tRNA_Ala	Ala-GGC-1	16	15	15	3	0.99865	0.0012251	0.520742	0.0772897	NA
V1	2_tRNA_Ala	Ala-GGC-1	17	16	16	3	0.998965	0.00117679	0.54309	0.07555	NA
V1	2_tRNA_Ala	Ala-GGC-1	18	17	17	3	0.99965	0.000387527	0.559059	0.07526	D
V1	2_tRNA_Ala	Ala-GGC-1	19	17A	NA	NA	NA	NA	NA	NA	NA
V1	2_tRNA_Ala	Ala-GGC-1	20	18	18	3	0.998341	0.00144279	0.572031	0.0741084	NA
V1	2_tRNA_Ala	Ala-GGC-1	21	19	19	3	0.99847	0.00134094	0.611966	0.0708049	NA
V1	2_tRNA_Ala	Ala-GGC-1	22	20	20	3	0.99684	0.00273844	0.639235	0.0688088	NA
V1	2_tRNA_Ala	Ala-GGC-1	23	20A	NA	NA	NA	NA	NA	NA	NA
V1	2_tRNA_Ala	Ala-GGC-1	24	20B	NA	NA	NA	NA	NA	NA	NA
V1	2_tRNA_Ala	Ala-GGC-1	25	21	21	3	0.999114	0.00087519	0.692554	0.0640774	NA
V1	2_tRNA_Ala	Ala-GGC-1	26	22	22	3	0.998003	0.0017297	0.699432	0.06331	NA
V1	2_tRNA_Ala	Ala-GGC-1	27	23	23	3	0.999386	0.00062514	0.706636	0.06305	NA
V1	2_tRNA_Ala	Ala-GGC-1	28	24	24	3	0.998801	0.00108841	0.708952	0.0633338	NA
V1	2_tRNA_Ala	Ala-GGC-1	29	25	25	3	0.998927	0.000939736	0.710736	0.0629171	NA
V1	2_tRNA_Ala	Ala-GGC-1	30	26	26	3	0.99897	0.00089556	0.712244	0.0628561	NA
V1	2_tRNA_Ala	Ala-GGC-1	31	27	27	3	0.99872	0.00118555	0.713987	0.0629373	NA
V1	2_tRNA_Ala	Ala-GGC-1	32	28	28	3	0.999305	0.000732463	0.715134	0.0630416	NA
V1	2_tRNA_Ala	Ala-GGC-1	33	29	29	3	0.998861	0.00155962	0.715844	0.062962	NA
V1	2_tRNA_Ala	Ala-GGC-1	34	30	30	3	0.99932	0.000606581	0.716453	0.062762	NA
V1	2_tRNA_Ala	Ala-GGC-1	35	31	31	3	0.999209	0.000885656	0.717352	0.0629805	NA
V1	2_tRNA_Ala	Ala-GGC-1	36	32	32	3	0.999169	0.000874404	0.719	0.0628324	NA
V1	2_tRNA_Ala	Ala-GGC-1	37	33	33	3	0.99859	0.0013143	0.722033	0.0623567	NA
V1	2_tRNA_Ala	Ala-GGC-1	38	34	34	3	0.998229	0.00157346	0.725293	0.0615406	NA
V1	2_tRNA_Ala	Ala-GGC-1	39	35	35	3	0.9968	0.00336438	0.742183	0.0602217	NA
V1	2_tRNA_Ala	Ala-GGC-1	40	36	36	3	0.997575	0.00222797	0.753885	0.0589455	NA
V1	2_tRNA_Ala	Ala-GGC-1	41	37	37	3	0.996663	0.00291466	0.761625	0.0582972	NA
V1	2_tRNA_Ala	Ala-GGC-1	42	38	38	3	0.984212	0.0136816	0.76664	0.0516866	NA
V1	2_tRNA_Ala	Ala-GGC-1	43	39	39	3	0.99837	0.00157352	0.844685	0.0382654	NA
V1	2_tRNA_Ala	Ala-GGC-1	44	40	40	3	0.998645	0.00156321	0.863228	0.0335574	NA
V1	2_tRNA_Ala	Ala-GGC-1	45	41	41	3	0.999111	0.000787549	0.868344	0.0304894	NA
V1	2_tRNA_Ala	Ala-GGC-1	46	42	42	3	0.998927	0.00104867	0.87124	0.0308742	NA
V1	2_tRNA_Ala	Ala-GGC-1	47	43	43	3	0.99712	0.00251515	0.873945	0.0307521	NA
V1	2_tRNA_Ala	Ala-GGC-1	48	44	44	3	0.999558	0.000437365	0.888858	0.025192	NA
V1	2_tRNA_Ala	Ala-GGC-1	49	45	45	3	0.99856	0.00137906	0.892973	0.0241296	NA
V1	2_tRNA_Ala	Ala-GGC-1	50	45A	46	3	0.998244	0.00174894	0.902277	0.0200086	m7G
V1	2_tRNA_Ala	Ala-GGC-1	51	45B	47	3	0.998131	0.00193953	0.917249	0.0165953	NA
V1	2_tRNA_Ala	Ala-GGC-1	52	45C	48	3	0.997836	0.00189072	0.927123	0.0147513	NA
V1	2_tRNA_Ala	Ala-GGC-1	53	45D	NA	NA	NA	NA	NA	NA	NA
V1	2_tRNA_Ala	Ala-GGC-1	54	45E	NA	NA	NA	NA	NA	NA	NA
V1	2_tRNA_Ala	Ala-GGC-1	55	45F	NA	NA	NA	NA	NA	NA	NA
V1	2_tRNA_Ala	Ala-GGC-1	56	45G	NA	NA	NA	NA	NA	NA	NA
V1	2_tRNA_Ala	Ala-GGC-1	57	45H	NA	NA	NA	NA	NA	NA	NA
V1	2_tRNA_Ala	Ala-GGC-1	58	45I	NA	NA	NA	NA	NA	NA	NA
V1	2_tRNA_Ala	Ala-GGC-1	59	45J	NA	NA	NA	NA	NA	NA	NA
V1	2_tRNA_Ala	Ala-GGC-1	60	45K	NA	NA	NA	NA	NA	NA	NA
V1	2_tRNA_Ala	Ala-GGC-1	61	45L	NA	NA	NA	NA	NA	NA	NA
V1	2_tRNA_Ala	Ala-GGC-1	62	45M	NA	NA	NA	NA	NA	NA	NA
V1	2_tRNA_Ala	Ala-GGC-1	63	45N	NA	NA	NA	NA	NA	NA	NA
V1	2_tRNA_Ala	Ala-GGC-1	64	45O	NA	NA	NA	NA	NA	NA	NA
V1	2_tRNA_Ala	Ala-GGC-1	65	45P	NA	NA	NA	NA	NA	NA	NA
V1	2_tRNA_Ala	Ala-GGC-1	66	45Q	NA	NA	NA	NA	NA	NA	NA
V1	2_tRNA_Ala	Ala-GGC-1	67	45R	NA	NA	NA	NA	NA	NA	NA
V1	2_tRNA_Ala	Ala-GGC-1	68	45S	NA	NA	NA	NA	NA	NA	NA
V1	2_tRNA_Ala	Ala-GGC-1	69	46	NA	NA	NA	NA	NA	NA	NA
V1	2_tRNA_Ala	Ala-GGC-1	70	47	NA	NA	NA	NA	NA	NA	NA
V1	2_tRNA_Ala	Ala-GGC-1	71	48	NA	NA	NA	NA	NA	NA	NA
V1	2_tRNA_Ala	Ala-GGC-1	72	49	49	3	0.998478	0.00131811	0.938204	0.0119698	NA
V1	2_tRNA_Ala	Ala-GGC-1	73	50	50	3	0.99832	0.00147222	0.947668	0.00915636	NA
V1	2_tRNA_Ala	Ala-GGC-1	74	51	51	3	0.999155	0.000767251	0.951746	0.00894611	NA
V1	2_tRNA_Ala	Ala-GGC-1	75	52	52	3	0.998564	0.00135266	0.953713	0.00886337	NA
V1	2_tRNA_Ala	Ala-GGC-1	76	53	53	3	0.999239	0.00098387	0.957961	0.00765869	NA
V1	2_tRNA_Ala	Ala-GGC-1	77	54	54	3	0.999545	0.000399309	0.96036	0.00728652	m5U
V1	2_tRNA_Ala	Ala-GGC-1	78	55	55	3	0.999822	0.00020966	0.962643	0.00658868	Y
V1	2_tRNA_Ala	Ala-GGC-1	79	56	56	3	0.995814	0.0036854	0.964304	0.00607708	NA
V1	2_tRNA_Ala	Ala-GGC-1	80	57	57	3	0.998192	0.00160312	0.967875	0.0058751	NA
V1	2_tRNA_Ala	Ala-GGC-1	81	58	58	3	0.999608	0.00040126	0.977748	0.00552404	NA
V1	2_tRNA_Ala	Ala-GGC-1	82	59	59	3	0.999484	0.000447353	0.983328	0.00402319	NA
V1	2_tRNA_Ala	Ala-GGC-1	83	60	60	3	0.99917	0.000761415	0.990803	0.00159709	NA
V1	2_tRNA_Ala	Ala-GGC-1	84	61	61	3	0.999173	0.00076059	0.998459	0.000121759	NA
V1	2_tRNA_Ala	Ala-GGC-1	85	62	62	3	0.9991	0.000811426	0.999188	0.000492544	NA
V1	2_tRNA_Ala	Ala-GGC-1	86	63	63	3	0.998274	0.00149467	1	0	NA
V1	2_tRNA_Ala	Ala-GGC-1	87	64	64	3	0.999726	0.000318816	0.999588	0.000159962	NA
V1	2_tRNA_Ala	Ala-GGC-1	88	65	65	3	0.997827	0.00188491	0.999588	0.000159962	NA
V1	2_tRNA_Ala	Ala-GGC-1	89	66	66	3	0.999398	0.000591203	0.999321	0.000264843	NA
V1	2_tRNA_Ala	Ala-GGC-1	90	67	67	3	0.999702	0.000263043	0.999396	0.000162281	NA
V1	2_tRNA_Ala	Ala-GGC-1	91	68	68	3	0.998796	0.00118241	0.999454	0.000211533	NA
V1	2_tRNA_Ala	Ala-GGC-1	92	69	69	3	0.999142	0.000797153	0.999279	7.07e-05	NA
V1	2_tRNA_Ala	Ala-GGC-1	93	70	70	3	0.999307	0.000806734	0.997267	0.000402814	NA
V1	2_tRNA_Ala	Ala-GGC-1	94	71	71	3	0.99923	0.000667504	0.996694	0.000348699	NA
V1	2_tRNA_Ala	Ala-GGC-1	95	72	72	3	0.999759	0.000314878	0.988199	0.00189664	NA
V1	2_tRNA_Ala	Ala-GGC-1	96	73	73	3	0.999799	0.0001958	0.931628	0.00878564	NA
V1	2_tRNA_Ala	Ala-GGC-1	97	74	74	3	1	0	0.852167	0.0293032	NA
V1	2_tRNA_Ala	Ala-GGC-1	98	75	75	3	1	0	0.617635	0.0550355	NA
V1	2_tRNA_Ala	Ala-GGC-1	99	76	76	3	1	0	0.541157	0.0573242	NA
V1	1_tRNA_Ala	Ala-TGC-1	1	0	NA	NA	NA	NA	NA	NA	NA
V1	1_tRNA_Ala	Ala-TGC-1	2	1	1	3	1	0	0.17064	0.0455345	NA
V1	1_tRNA_Ala	Ala-TGC-1	3	2	2	3	1	0	0.173774	0.0470308	NA
V1	1_tRNA_Ala	Ala-TGC-1	4	3	3	3	0.998625	0.00186257	0.175466	0.0474301	NA
V1	1_tRNA_Ala	Ala-TGC-1	5	4	4	3	0.996828	0.00227269	0.176253	0.0470284	NA
V1	1_tRNA_Ala	Ala-TGC-1	6	5	5	3	0.992513	0.00542549	0.176582	0.047175	NA
V1	1_tRNA_Ala	Ala-TGC-1	7	6	6	3	0.977033	0.00720174	0.17355	0.0454964	NA
V1	1_tRNA_Ala	Ala-TGC-1	8	7	7	3	0.97609	0.00657485	0.175211	0.0454487	NA
V1	1_tRNA_Ala	Ala-TGC-1	9	8	8	3	0.960026	0.0128456	0.182074	0.0477816	NA
V1	1_tRNA_Ala	Ala-TGC-1	10	9	9	3	0.998812	0.000525498	0.193456	0.0491247	NA
V1	1_tRNA_Ala	Ala-TGC-1	11	10	10	3	0.994867	0.00301559	0.199713	0.050248	NA
V1	1_tRNA_Ala	Ala-TGC-1	12	11	11	3	0.994023	0.000986194	0.200697	0.050558	NA
V1	1_tRNA_Ala	Ala-TGC-1	13	12	12	3	0.997222	0.00258189	0.201451	0.0506095	NA
V1	1_tRNA_Ala	Ala-TGC-1	14	13	13	3	0.988055	0.00603462	0.202808	0.0509871	NA
V1	1_tRNA_Ala	Ala-TGC-1	15	14	14	3	0.997794	0.000684678	0.203996	0.0511964	NA
V1	1_tRNA_Ala	Ala-TGC-1	16	15	15	3	0.99508	0.00251051	0.204732	0.0509952	NA
V1	1_tRNA_Ala	Ala-TGC-1	17	16	16	3	0.996091	0.00235688	0.211866	0.0507634	NA
V1	1_tRNA_Ala	Ala-TGC-1	18	17	17	3	0.993834	0.00185255	0.217227	0.0510042	D
V1	1_tRNA_Ala	Ala-TGC-1	19	17A	NA	NA	NA	NA	NA	NA	NA
V1	1_tRNA_Ala	Ala-TGC-1	20	18	18	3	0.991884	0.00129583	0.222997	0.0526944	NA
V1	1_tRNA_Ala	Ala-TGC-1	21	19	19	3	0.992235	0.00143164	0.228261	0.0541051	NA
V1	1_tRNA_Ala	Ala-TGC-1	22	20	20	3	0.988674	0.00459447	0.231829	0.0533934	NA
V1	1_tRNA_Ala	Ala-TGC-1	23	20A	NA	NA	NA	NA	NA	NA	NA
V1	1_tRNA_Ala	Ala-TGC-1	24	20B	NA	NA	NA	NA	NA	NA	NA
V1	1_tRNA_Ala	Ala-TGC-1	25	21	21	3	0.995882	0.00144836	0.237711	0.0537801	NA
V1	1_tRNA_Ala	Ala-TGC-1	26	22	22	3	0.993541	0.00387036	0.239177	0.0542434	NA
V1	1_tRNA_Ala	Ala-TGC-1	27	23	23	3	0.997792	0.000911348	0.23999	0.0537079	NA
V1	1_tRNA_Ala	Ala-TGC-1	28	24	24	3	0.993899	0.00390321	0.240162	0.0538407	NA
V1	1_tRNA_Ala	Ala-TGC-1	29	25	25	3	0.994884	0.000848431	0.240746	0.0538947	NA
V1	1_tRNA_Ala	Ala-TGC-1	30	26	26	3	0.994599	0.00320606	0.240621	0.0538414	NA
V1	1_tRNA_Ala	Ala-TGC-1	31	27	27	3	0.995913	0.000642823	0.241181	0.053979	NA
V1	1_tRNA_Ala	Ala-TGC-1	32	28	28	3	0.996267	0.000544119	0.24103	0.0538393	NA
V1	1_tRNA_Ala	Ala-TGC-1	33	29	29	3	0.996894	0.000422316	0.241455	0.0539278	NA
V1	1_tRNA_Ala	Ala-TGC-1	34	30	30	3	0.992029	0.00255206	0.241565	0.0538156	NA
V1	1_tRNA_Ala	Ala-TGC-1	35	31	31	3	0.996946	0.00047263	0.241596	0.0538792	NA
V1	1_tRNA_Ala	Ala-TGC-1	36	32	32	3	0.96991	0.00431024	0.225991	0.0514025	NA
V1	1_tRNA_Ala	Ala-TGC-1	37	33	33	3	0.993102	0.00301891	0.229102	0.0519372	NA
V1	1_tRNA_Ala	Ala-TGC-1	38	34	34	3	0.939324	0.00743058	0.0847931	0.00923019	cmo5U
V1	1_tRNA_Ala	Ala-TGC-1	39	35	35	3	0.982169	0.00754071	0.0945515	0.010327	NA
V1	1_tRNA_Ala	Ala-TGC-1	40	36	36	3	0.748123	0.0378312	0.089054	0.0101877	NA
V1	1_tRNA_Ala	Ala-TGC-1	41	37	37	3	0.839814	0.0281483	0.125787	0.0149314	NA
V1	1_tRNA_Ala	Ala-TGC-1	42	38	38	3	0.915528	0.0174203	0.265393	0.0539243	NA
V1	1_tRNA_Ala	Ala-TGC-1	43	39	39	3	0.997398	0.00165781	0.477613	0.0238322	NA
V1	1_tRNA_Ala	Ala-TGC-1	44	40	40	3	0.991805	0.00298075	0.523033	0.0140031	NA
V1	1_tRNA_Ala	Ala-TGC-1	45	41	41	3	0.998932	0.00046988	0.5439	0.00537105	NA
V1	1_tRNA_Ala	Ala-TGC-1	46	42	42	3	0.987581	0.00548642	0.559292	0.00282842	NA
V1	1_tRNA_Ala	Ala-TGC-1	47	43	43	3	0.980694	0.0120408	0.569715	0.00100394	NA
V1	1_tRNA_Ala	Ala-TGC-1	48	44	44	3	0.997285	0.000904736	0.611508	0.010435	NA
V1	1_tRNA_Ala	Ala-TGC-1	49	45	45	3	0.995305	0.0017151	0.623997	0.0111652	NA
V1	1_tRNA_Ala	Ala-TGC-1	50	45A	46	3	0.996194	0.000552059	0.650283	0.0115016	m7G
V1	1_tRNA_Ala	Ala-TGC-1	51	45B	47	3	0.994683	0.0026898	0.702785	0.0108453	NA
V1	1_tRNA_Ala	Ala-TGC-1	52	45C	48	3	0.996043	0.00113281	0.738667	0.0128576	NA
V1	1_tRNA_Ala	Ala-TGC-1	53	45D	NA	NA	NA	NA	NA	NA	NA
V1	1_tRNA_Ala	Ala-TGC-1	54	45E	NA	NA	NA	NA	NA	NA	NA
V1	1_tRNA_Ala	Ala-TGC-1	55	45F	NA	NA	NA	NA	NA	NA	NA
V1	1_tRNA_Ala	Ala-TGC-1	56	45G	NA	NA	NA	NA	NA	NA	NA
V1	1_tRNA_Ala	Ala-TGC-1	57	45H	NA	NA	NA	NA	NA	NA	NA
V1	1_tRNA_Ala	Ala-TGC-1	58	45I	NA	NA	NA	NA	NA	NA	NA
V1	1_tRNA_Ala	Ala-TGC-1	59	45J	NA	NA	NA	NA	NA	NA	NA
V1	1_tRNA_Ala	Ala-TGC-1	60	45K	NA	NA	NA	NA	NA	NA	NA
V1	1_tRNA_Ala	Ala-TGC-1	61	45L	NA	NA	NA	NA	NA	NA	NA
V1	1_tRNA_Ala	Ala-TGC-1	62	45M	NA	NA	NA	NA	NA	NA	NA
V1	1_tRNA_Ala	Ala-TGC-1	63	45N	NA	NA	NA	NA	NA	NA	NA
V1	1_tRNA_Ala	Ala-TGC-1	64	45O	NA	NA	NA	NA	NA	NA	NA
V1	1_tRNA_Ala	Ala-TGC-1	65	45P	NA	NA	NA	NA	NA	NA	NA
V1	1_tRNA_Ala	Ala-TGC-1	66	45Q	NA	NA	NA	NA	NA	NA	NA
V1	1_tRNA_Ala	Ala-TGC-1	67	45R	NA	NA	NA	NA	NA	NA	NA
V1	1_tRNA_Ala	Ala-TGC-1	68	45S	NA	NA	NA	NA	NA	NA	NA
V1	1_tRNA_Ala	Ala-TGC-1	69	46	NA	NA	NA	NA	NA	NA	NA
V1	1_tRNA_Ala	Ala-TGC-1	70	47	NA	NA	NA	NA	NA	NA	NA
V1	1_tRNA_Ala	Ala-TGC-1	71	48	NA	NA	NA	NA	NA	NA	NA
V1	1_tRNA_Ala	Ala-TGC-1	72	49	49	3	0.996978	0.0011746	0.776491	0.00946509	NA
V1	1_tRNA_Ala	Ala-TGC-1	73	50	50	3	0.998471	0.000677909	0.803496	0.00807899	NA
V1	1_tRNA_Ala	Ala-TGC-1	74	51	51	3	0.99817	0.0011046	0.816349	0.0074551	NA
V1	1_tRNA_Ala	Ala-TGC-1	75	52	52	3	0.999409	0.000296558	0.828965	0.00800487	NA
V1	1_tRNA_Ala	Ala-TGC-1	76	53	53	3	0.99729	0.000163141	0.851739	0.00944608	NA
V1	1_tRNA_Ala	Ala-TGC-1	77	54	54	3	0.998806	0.00026431	0.858709	0.0110484	m5U
V1	1_tRNA_Ala	Ala-TGC-1	78	55	55	3	0.999303	0.00048613	0.864497	0.0115662	Y
V1	1_tRNA_Ala	Ala-TGC-1	79	56	56	3	0.99051	0.000703318	0.870575	0.00999407	NA
V1	1_tRNA_Ala	Ala-TGC-1	80	57	57	3	0.993102	0.0033275	0.884732	0.0111496	NA
V1	1_tRNA_Ala	Ala-TGC-1	81	58	58	3	0.999434	0.000225475	0.91323	0.0130368	NA
V1	1_tRNA_Ala	Ala-TGC-1	82	59	59	3	0.997134	0.000786168	0.9349	0.0104952	NA
V1	1_tRNA_Ala	Ala-TGC-1	83	60	60	3	0.997713	0.00126792	0.962904	0.00496234	NA
V1	1_tRNA_Ala	Ala-TGC-1	84	61	61	3	0.997485	0.000554507	0.992305	0.00122729	NA
V1	1_tRNA_Ala	Ala-TGC-1	85	62	62	3	0.998097	0.000388253	0.996929	0.000826171	NA
V1	1_tRNA_Ala	Ala-TGC-1	86	63	63	3	0.996208	0.000681855	0.999626	0.000122292	NA
V1	1_tRNA_Ala	Ala-TGC-1	87	64	64	3	0.997628	0.000861229	0.999978	3.76e-05	NA
V1	1_tRNA_Ala	Ala-TGC-1	88	65	65	3	0.998138	0.00108867	1	0	NA
V1	1_tRNA_Ala	Ala-TGC-1	89	66	66	3	0.998247	0.00035929	0.999761	4.73e-05	NA
V1	1_tRNA_Ala	Ala-TGC-1	90	67	67	3	0.99869	0.000387281	0.999142	0.000269385	NA
V1	1_tRNA_Ala	Ala-TGC-1	91	68	68	3	0.996407	0.00161135	0.999209	0.000124381	NA
V1	1_tRNA_Ala	Ala-TGC-1	92	69	69	3	0.998014	0.00133926	0.999149	0.000242273	NA
V1	1_tRNA_Ala	Ala-TGC-1	93	70	70	3	0.997269	0.000684736	0.995312	0.000426597	NA
V1	1_tRNA_Ala	Ala-TGC-1	94	71	71	3	0.997819	0.000188494	0.995055	0.000446589	NA
V1	1_tRNA_Ala	Ala-TGC-1	95	72	72	3	0.999151	0.000310779	0.982482	0.00379369	NA
V1	1_tRNA_Ala	Ala-TGC-1	96	73	73	3	0.999663	0.000294693	0.916744	0.0204478	NA
V1	1_tRNA_Ala	Ala-TGC-1	97	74	74	3	1	0	0.824954	0.0368032	NA
V1	1_tRNA_Ala	Ala-TGC-1	98	75	75	3	1	0	0.571719	0.066211	NA
V1	1_tRNA_Ala	Ala-TGC-1	99	76	76	3	1	0	0.502851	0.0668107	NA
V1	3_tRNA_Arg	Arg-ACG-1	1	0	NA	NA	NA	NA	NA	NA	NA
V1	3_tRNA_Arg	Arg-ACG-1	2	1	1	3	1	0	0.0103304	0.00247432	NA
V1	3_tRNA_Arg	Arg-ACG-1	3	2	2	3	1	0	0.0106452	0.0025458	NA
V1	3_tRNA_Arg	Arg-ACG-1	4	3	3	3	0.998075	0.00247528	0.0107754	0.00255766	NA
V1	3_tRNA_Arg	Arg-ACG-1	5	4	4	3	0.997027	0.00386513	0.0108226	0.00256005	NA
V1	3_tRNA_Arg	Arg-ACG-1	6	5	5	3	0.995507	0.00294276	0.0108501	0.00255791	NA
V1	3_tRNA_Arg	Arg-ACG-1	7	6	6	3	0.993104	0.00207146	0.0109141	0.00257884	NA
V1	3_tRNA_Arg	Arg-ACG-1	8	7	7	3	0.996011	0.00346202	0.0110081	0.00260569	NA
V1	3_tRNA_Arg	Arg-ACG-1	9	8	8	3	0.972954	0.00405782	0.011163	0.00264693	s4U
V1	3_tRNA_Arg	Arg-ACG-1	10	9	9	3	0.999379	0.000697402	0.0116123	0.00270981	NA
V1	3_tRNA_Arg	Arg-ACG-1	11	10	10	3	0.997227	0.00141724	0.012051	0.00272518	NA
V1	3_tRNA_Arg	Arg-ACG-1	12	11	11	3	0.996357	0.000739097	0.0121203	0.00274119	NA
V1	3_tRNA_Arg	Arg-ACG-1	13	12	12	3	0.99788	0.00191082	0.0121844	0.00269387	NA
V1	3_tRNA_Arg	Arg-ACG-1	14	13	13	3	0.994102	0.00289365	0.0122602	0.00271883	NA
V1	3_tRNA_Arg	Arg-ACG-1	15	14	14	3	0.999389	0.00105742	0.0123523	0.00267523	NA
V1	3_tRNA_Arg	Arg-ACG-1	16	15	15	3	0.997629	0.00142098	0.012421	0.00267361	NA
V1	3_tRNA_Arg	Arg-ACG-1	17	16	16	3	0.997107	0.000880148	0.0126983	0.0027163	NA
V1	3_tRNA_Arg	Arg-ACG-1	18	17	17	3	0.99958	0.000728058	0.0128818	0.00277102	D
V1	3_tRNA_Arg	Arg-ACG-1	19	17A	NA	NA	NA	NA	NA	NA	NA
V1	3_tRNA_Arg	Arg-ACG-1	20	18	18	3	0.999014	0.000886519	0.0131187	0.00280011	NA
V1	3_tRNA_Arg	Arg-ACG-1	21	19	19	3	0.998368	0.00186375	0.013472	0.00277782	NA
V1	3_tRNA_Arg	Arg-ACG-1	22	20	20	3	0.998674	0.00138699	0.0139129	0.00269772	NA
V1	3_tRNA_Arg	Arg-ACG-1	23	20A	21	3	0.99987	0.000225616	0.0140144	0.00267359	D
V1	3_tRNA_Arg	Arg-ACG-1	24	20B	NA	NA	NA	NA	NA	NA	NA
V1	3_tRNA_Arg	Arg-ACG-1	25	21	22	3	0.997064	0.00339578	0.0142308	0.00275031	NA
V1	3_tRNA_Arg	Arg-ACG-1	26	22	23	3	0.997208	0.000537019	0.0144336	0.00282979	NA
V1	3_tRNA_Arg	Arg-ACG-1	27	23	24	3	0.999336	0.000619615	0.0140784	0.00263106	NA
V1	3_tRNA_Arg	Arg-ACG-1	28	24	25	3	0.99893	0.00125287	0.0141509	0.00259453	NA
V1	3_tRNA_Arg	Arg-ACG-1	29	25	26	3	0.99975	0.000433284	0.0142852	0.00257618	NA
V1	3_tRNA_Arg	Arg-ACG-1	30	26	27	3	0.999098	0.000792775	0.0143812	0.00256026	NA
V1	3_tRNA_Arg	Arg-ACG-1	31	27	28	3	0.996682	0.000342297	0.0143787	0.00255812	NA
V1	3_tRNA_Arg	Arg-ACG-1	32	28	29	3	0.999876	0.00021423	0.014395	0.00257224	NA
V1	3_tRNA_Arg	Arg-ACG-1	33	29	30	3	0.996033	0.000806871	0.0143969	0.00257397	NA
V1	3_tRNA_Arg	Arg-ACG-1	34	30	31	3	0.997746	0.00105249	0.0144068	0.00258265	NA
V1	3_tRNA_Arg	Arg-ACG-1	35	31	32	3	0.997032	0.00340748	0.0144036	0.0026459	NA
V1	3_tRNA_Arg	Arg-ACG-1	36	32	33	3	0.994508	0.00142706	0.0130459	0.0028548	s2C
V1	3_tRNA_Arg	Arg-ACG-1	37	33	34	3	0.998134	0.00222532	0.0117488	0.00267489	NA
V1	3_tRNA_Arg	Arg-ACG-1	38	34	35	3	0.0146298	0.00851091	0.0104498	0.0025049	I
V1	3_tRNA_Arg	Arg-ACG-1	39	35	36	3	0.996065	0.00497283	0.0107097	0.00253923	NA
V1	3_tRNA_Arg	Arg-ACG-1	40	36	37	3	0.998077	0.00204026	0.0107698	0.00260523	NA
V1	3_tRNA_Arg	Arg-ACG-1	41	37	38	3	0.986946	0.0058269	0.0108018	0.00259082	m2A
V1	3_tRNA_Arg	Arg-ACG-1	42	38	39	3	0.989586	0.00624217	0.0102124	0.00243246	NA
V1	3_tRNA_Arg	Arg-ACG-1	43	39	40	3	0.980451	0.00638862	0.00844982	0.00261869	NA
V1	3_tRNA_Arg	Arg-ACG-1	44	40	41	3	0.993253	0.00591534	0.00859953	0.00292709	NA
V1	3_tRNA_Arg	Arg-ACG-1	45	41	42	3	0.997073	0.00327707	0.00865571	0.00305287	NA
V1	3_tRNA_Arg	Arg-ACG-1	46	42	43	3	0.999682	0.000550382	0.00915044	0.00311988	NA
V1	3_tRNA_Arg	Arg-ACG-1	47	43	44	3	0.996503	0.00316624	0.0091499	0.00312977	NA
V1	3_tRNA_Arg	Arg-ACG-1	48	44	45	3	0.94413	0.0165305	0.00916486	0.00314807	NA
V1	3_tRNA_Arg	Arg-ACG-1	49	45	46	3	0.91618	0.0394842	0.00886569	0.0027847	NA
V1	3_tRNA_Arg	Arg-ACG-1	50	45A	47	3	0.953881	0.0251276	0.00960969	0.00319142	m7G
V1	3_tRNA_Arg	Arg-ACG-1	51	45B	48	3	0.875181	0.0217068	0.0343219	0.013071	acp3U
V1	3_tRNA_Arg	Arg-ACG-1	52	45C	49	3	0.999333	0.000641355	0.886439	0.00797968	NA
V1	3_tRNA_Arg	Arg-ACG-1	53	45D	NA	NA	NA	NA	NA	NA	NA
V1	3_tRNA_Arg	Arg-ACG-1	54	45E	NA	NA	NA	NA	NA	NA	NA
V1	3_tRNA_Arg	Arg-ACG-1	55	45F	NA	NA	NA	NA	NA	NA	NA
V1	3_tRNA_Arg	Arg-ACG-1	56	45G	NA	NA	NA	NA	NA	NA	NA
V1	3_tRNA_Arg	Arg-ACG-1	57	45H	NA	NA	NA	NA	NA	NA	NA
V1	3_tRNA_Arg	Arg-ACG-1	58	45I	NA	NA	NA	NA	NA	NA	NA
V1	3_tRNA_Arg	Arg-ACG-1	59	45J	NA	NA	NA	NA	NA	NA	NA
V1	3_tRNA_Arg	Arg-ACG-1	60	45K	NA	NA	NA	NA	NA	NA	NA
V1	3_tRNA_Arg	Arg-ACG-1	61	45L	NA	NA	NA	NA	NA	NA	NA
V1	3_tRNA_Arg	Arg-ACG-1	62	45M	NA	NA	NA	NA	NA	NA	NA
V1	3_tRNA_Arg	Arg-ACG-1	63	45N	NA	NA	NA	NA	NA	NA	NA
V1	3_tRNA_Arg	Arg-ACG-1	64	45O	NA	NA	NA	NA	NA	NA	NA
V1	3_tRNA_Arg	Arg-ACG-1	65	45P	NA	NA	NA	NA	NA	NA	NA
V1	3_tRNA_Arg	Arg-ACG-1	66	45Q	NA	NA	NA	NA	NA	NA	NA
V1	3_tRNA_Arg	Arg-ACG-1	67	45R	NA	NA	NA	NA	NA	NA	NA
V1	3_tRNA_Arg	Arg-ACG-1	68	45S	NA	NA	NA	NA	NA	NA	NA
V1	3_tRNA_Arg	Arg-ACG-1	69	46	NA	NA	NA	NA	NA	NA	NA
V1	3_tRNA_Arg	Arg-ACG-1	70	47	NA	NA	NA	NA	NA	NA	NA
V1	3_tRNA_Arg	Arg-ACG-1	71	48	NA	NA	NA	NA	NA	NA	NA
V1	3_tRNA_Arg	Arg-ACG-1	72	49	50	3	0.998584	0.00101016	0.92399	0.00682612	NA
V1	3_tRNA_Arg	Arg-ACG-1	73	50	51	3	0.999125	0.000749711	0.943452	0.0055077	NA
V1	3_tRNA_Arg	Arg-ACG-1	74	51	52	3	0.999625	0.000249867	0.954889	0.00444311	NA
V1	3_tRNA_Arg	Arg-ACG-1	75	52	53	3	0.999542	0.000590352	0.958804	0.00412992	NA
V1	3_tRNA_Arg	Arg-ACG-1	76	53	54	3	0.999375	0.000695443	0.962394	0.00395109	NA
V1	3_tRNA_Arg	Arg-ACG-1	77	54	55	3	0.999875	0.000124891	0.963603	0.00365833	m5U
V1	3_tRNA_Arg	Arg-ACG-1	78	55	56	3	0.999833	0.000144202	0.964695	0.00375251	Y
V1	3_tRNA_Arg	Arg-ACG-1	79	56	57	3	0.997503	0.00225781	0.965092	0.00365394	NA
V1	3_tRNA_Arg	Arg-ACG-1	80	57	58	3	0.998377	0.000900284	0.96892	0.00351841	NA
V1	3_tRNA_Arg	Arg-ACG-1	81	58	59	3	0.999625	0.000450066	0.977463	0.00315132	NA
V1	3_tRNA_Arg	Arg-ACG-1	82	59	60	3	0.999584	0.000438324	0.983844	0.00266421	NA
V1	3_tRNA_Arg	Arg-ACG-1	83	60	61	3	0.999875	0.000124797	0.993816	0.00142645	NA
V1	3_tRNA_Arg	Arg-ACG-1	84	61	62	3	0.999584	0.000438212	0.999059	0.000184689	NA
V1	3_tRNA_Arg	Arg-ACG-1	85	62	63	3	0.999626	0.000330076	0.999766	0.000138848	NA
V1	3_tRNA_Arg	Arg-ACG-1	86	63	64	3	0.999584	7.21e-05	0.999129	0.00016608	NA
V1	3_tRNA_Arg	Arg-ACG-1	87	64	65	3	0.999334	0.000438318	1	0	NA
V1	3_tRNA_Arg	Arg-ACG-1	88	65	66	3	0.998669	0.000731478	0.999382	7.84e-05	NA
V1	3_tRNA_Arg	Arg-ACG-1	89	66	67	3	0.999002	0.000660541	0.998906	0.000227407	NA
V1	3_tRNA_Arg	Arg-ACG-1	90	67	68	3	0.998918	0.000876709	0.999936	1.01e-05	NA
V1	3_tRNA_Arg	Arg-ACG-1	91	68	69	3	0.99896	0.00104678	0.999527	0.000164029	NA
V1	3_tRNA_Arg	Arg-ACG-1	92	69	70	3	0.999792	0.000190658	0.999819	6.06e-05	NA
V1	3_tRNA_Arg	Arg-ACG-1	93	70	71	3	0.999875	0.000124906	0.998631	0.000312289	NA
V1	3_tRNA_Arg	Arg-ACG-1	94	71	72	3	0.999708	0.000401684	0.997225	0.000565859	NA
V1	3_tRNA_Arg	Arg-ACG-1	95	72	73	3	0.999456	0.000726138	0.978994	0.0051791	NA
V1	3_tRNA_Arg	Arg-ACG-1	96	73	74	3	0.999916	0.00014635	0.951958	0.0073026	NA
V1	3_tRNA_Arg	Arg-ACG-1	97	74	75	3	1	0	0.88039	0.0224191	NA
V1	3_tRNA_Arg	Arg-ACG-1	98	75	76	3	1	0	0.576472	0.0376129	NA
V1	3_tRNA_Arg	Arg-ACG-1	99	76	77	3	1	0	0.491073	0.0436468	NA
V1	4_tRNA_Arg	Arg-CCG-1	1	0	NA	NA	NA	NA	NA	NA	NA
V1	4_tRNA_Arg	Arg-CCG-1	2	1	1	NA	NA	NA	NA	NA	NA
V1	4_tRNA_Arg	Arg-CCG-1	3	2	2	NA	NA	NA	NA	NA	NA
V1	4_tRNA_Arg	Arg-CCG-1	4	3	3	NA	NA	NA	NA	NA	NA
V1	4_tRNA_Arg	Arg-CCG-1	5	4	4	NA	NA	NA	NA	NA	NA
V1	4_tRNA_Arg	Arg-CCG-1	6	5	5	NA	NA	NA	NA	NA	NA
V1	4_tRNA_Arg	Arg-CCG-1	7	6	6	NA	NA	NA	NA	NA	NA
V1	4_tRNA_Arg	Arg-CCG-1	8	7	7	NA	NA	NA	NA	NA	NA
V1	4_tRNA_Arg	Arg-CCG-1	9	8	8	NA	NA	NA	NA	NA	NA
V1	4_tRNA_Arg	Arg-CCG-1	10	9	9	NA	NA	NA	NA	NA	NA
V1	4_tRNA_Arg	Arg-CCG-1	11	10	10	NA	NA	NA	NA	NA	NA
V1	4_tRNA_Arg	Arg-CCG-1	12	11	11	NA	NA	NA	NA	NA	NA
V1	4_tRNA_Arg	Arg-CCG-1	13	12	12	NA	NA	NA	NA	NA	NA
V1	4_tRNA_Arg	Arg-CCG-1	14	13	13	NA	NA	NA	NA	NA	NA
V1	4_tRNA_Arg	Arg-CCG-1	15	14	14	NA	NA	NA	NA	NA	NA
V1	4_tRNA_Arg	Arg-CCG-1	16	15	15	NA	NA	NA	NA	NA	NA
V1	4_tRNA_Arg	Arg-CCG-1	17	16	16	NA	NA	NA	NA	NA	NA
V1	4_tRNA_Arg	Arg-CCG-1	18	17	17	NA	NA	NA	NA	NA	D
V1	4_tRNA_Arg	Arg-CCG-1	19	17A	NA	NA	NA	NA	NA	NA	NA
V1	4_tRNA_Arg	Arg-CCG-1	20	18	18	NA	NA	NA	NA	NA	NA
V1	4_tRNA_Arg	Arg-CCG-1	21	19	19	NA	NA	NA	NA	NA	NA
V1	4_tRNA_Arg	Arg-CCG-1	22	20	20	NA	NA	NA	NA	NA	NA
V1	4_tRNA_Arg	Arg-CCG-1	23	20A	21	NA	NA	NA	NA	NA	D
V1	4_tRNA_Arg	Arg-CCG-1	24	20B	NA	NA	NA	NA	NA	NA	NA
V1	4_tRNA_Arg	Arg-CCG-1	25	21	22	NA	NA	NA	NA	NA	NA
V1	4_tRNA_Arg	Arg-CCG-1	26	22	23	NA	NA	NA	NA	NA	NA
V1	4_tRNA_Arg	Arg-CCG-1	27	23	24	NA	NA	NA	NA	NA	NA
V1	4_tRNA_Arg	Arg-CCG-1	28	24	25	NA	NA	NA	NA	NA	NA
V1	4_tRNA_Arg	Arg-CCG-1	29	25	26	NA	NA	NA	NA	NA	NA
V1	4_tRNA_Arg	Arg-CCG-1	30	26	27	NA	NA	NA	NA	NA	NA
V1	4_tRNA_Arg	Arg-CCG-1	31	27	28	NA	NA	NA	NA	NA	NA
V1	4_tRNA_Arg	Arg-CCG-1	32	28	29	NA	NA	NA	NA	NA	NA
V1	4_tRNA_Arg	Arg-CCG-1	33	29	30	NA	NA	NA	NA	NA	NA
V1	4_tRNA_Arg	Arg-CCG-1	34	30	31	NA	NA	NA	NA	NA	NA
V1	4_tRNA_Arg	Arg-CCG-1	35	31	32	NA	NA	NA	NA	NA	NA
V1	4_tRNA_Arg	Arg-CCG-1	36	32	33	NA	NA	NA	NA	NA	s2C
V1	4_tRNA_Arg	Arg-CCG-1	37	33	34	NA	NA	NA	NA	NA	NA
V1	4_tRNA_Arg	Arg-CCG-1	38	34	35	NA	NA	NA	NA	NA	NA
V1	4_tRNA_Arg	Arg-CCG-1	39	35	36	NA	NA	NA	NA	NA	NA
V1	4_tRNA_Arg	Arg-CCG-1	40	36	37	NA	NA	NA	NA	NA	NA
V1	4_tRNA_Arg	Arg-CCG-1	41	37	38	NA	NA	NA	NA	NA	m1G
V1	4_tRNA_Arg	Arg-CCG-1	42	38	39	NA	NA	NA	NA	NA	NA
V1	4_tRNA_Arg	Arg-CCG-1	43	39	40	NA	NA	NA	NA	NA	NA
V1	4_tRNA_Arg	Arg-CCG-1	44	40	41	NA	NA	NA	NA	NA	NA
V1	4_tRNA_Arg	Arg-CCG-1	45	41	42	NA	NA	NA	NA	NA	NA
V1	4_tRNA_Arg	Arg-CCG-1	46	42	43	NA	NA	NA	NA	NA	NA
V1	4_tRNA_Arg	Arg-CCG-1	47	43	44	NA	NA	NA	NA	NA	NA
V1	4_tRNA_Arg	Arg-CCG-1	48	44	45	NA	NA	NA	NA	NA	NA
V1	4_tRNA_Arg	Arg-CCG-1	49	45	46	NA	NA	NA	NA	NA	NA
V1	4_tRNA_Arg	Arg-CCG-1	50	45A	47	1	0.849057	NA	0.107071	NA	m7G
V1	4_tRNA_Arg	Arg-CCG-1	51	45B	48	1	0.910448	NA	0.128283	NA	NA
V1	4_tRNA_Arg	Arg-CCG-1	52	45C	49	1	0.989583	NA	0.385859	NA	NA
V1	4_tRNA_Arg	Arg-CCG-1	53	45D	NA	NA	NA	NA	NA	NA	NA
V1	4_tRNA_Arg	Arg-CCG-1	54	45E	NA	NA	NA	NA	NA	NA	NA
V1	4_tRNA_Arg	Arg-CCG-1	55	45F	NA	NA	NA	NA	NA	NA	NA
V1	4_tRNA_Arg	Arg-CCG-1	56	45G	NA	NA	NA	NA	NA	NA	NA
V1	4_tRNA_Arg	Arg-CCG-1	57	45H	NA	NA	NA	NA	NA	NA	NA
V1	4_tRNA_Arg	Arg-CCG-1	58	45I	NA	NA	NA	NA	NA	NA	NA
V1	4_tRNA_Arg	Arg-CCG-1	59	45J	NA	NA	NA	NA	NA	NA	NA
V1	4_tRNA_Arg	Arg-CCG-1	60	45K	NA	NA	NA	NA	NA	NA	NA
V1	4_tRNA_Arg	Arg-CCG-1	61	45L	NA	NA	NA	NA	NA	NA	NA
V1	4_tRNA_Arg	Arg-CCG-1	62	45M	NA	NA	NA	NA	NA	NA	NA
V1	4_tRNA_Arg	Arg-CCG-1	63	45N	NA	NA	NA	NA	NA	NA	NA
V1	4_tRNA_Arg	Arg-CCG-1	64	45O	NA	NA	NA	NA	NA	NA	NA
V1	4_tRNA_Arg	Arg-CCG-1	65	45P	NA	NA	NA	NA	NA	NA	NA
V1	4_tRNA_Arg	Arg-CCG-1	66	45Q	NA	NA	NA	NA	NA	NA	NA
V1	4_tRNA_Arg	Arg-CCG-1	67	45R	NA	NA	NA	NA	NA	NA	NA
V1	4_tRNA_Arg	Arg-CCG-1	68	45S	NA	NA	NA	NA	NA	NA	NA
V1	4_tRNA_Arg	Arg-CCG-1	69	46	NA	NA	NA	NA	NA	NA	NA
V1	4_tRNA_Arg	Arg-CCG-1	70	47	NA	NA	NA	NA	NA	NA	NA
V1	4_tRNA_Arg	Arg-CCG-1	71	48	NA	NA	NA	NA	NA	NA	NA
V1	4_tRNA_Arg	Arg-CCG-1	72	49	50	1	0.950125	NA	0.39798	NA	NA
V1	4_tRNA_Arg	Arg-CCG-1	73	50	51	1	0.984055	NA	0.440404	NA	NA
V1	4_tRNA_Arg	Arg-CCG-1	74	51	52	1	0.982456	NA	0.459596	NA	NA
V1	4_tRNA_Arg	Arg-CCG-1	75	52	53	3	1	0	0.95587	0.00786784	NA
V1	4_tRNA_Arg	Arg-CCG-1	76	53	54	3	0.999306	0.00120281	0.963029	0.00699222	NA
V1	4_tRNA_Arg	Arg-CCG-1	77	54	55	3	0.999306	0.00120156	0.963365	0.00748111	m5U
V1	4_tRNA_Arg	Arg-CCG-1	78	55	56	3	0.996914	0.00534584	0.963365	0.00748111	Y
V1	4_tRNA_Arg	Arg-CCG-1	79	56	57	3	0.985862	0.0120002	0.963029	0.00699222	NA
V1	4_tRNA_Arg	Arg-CCG-1	80	57	58	3	0.992514	0.00711113	0.963702	0.00798268	NA
V1	4_tRNA_Arg	Arg-CCG-1	81	58	59	3	1	0	0.973049	0.00861272	NA
V1	4_tRNA_Arg	Arg-CCG-1	82	59	60	3	1	0	0.988208	0.00701366	NA
V1	4_tRNA_Arg	Arg-CCG-1	83	60	61	3	0.999646	0.000612898	0.949473	0.00235104	NA
V1	4_tRNA_Arg	Arg-CCG-1	84	61	62	3	1	0	0.974908	0.00657895	NA
V1	4_tRNA_Arg	Arg-CCG-1	85	62	63	3	0.987908	0.0104824	0.977097	0.00529405	NA
V1	4_tRNA_Arg	Arg-CCG-1	86	63	64	3	1	0	0.975918	0.00552733	NA
V1	4_tRNA_Arg	Arg-CCG-1	87	64	65	3	0.999306	0.00120281	0.973393	0.00775137	NA
V1	4_tRNA_Arg	Arg-CCG-1	88	65	66	3	0.987739	0.00498582	0.973057	0.00800983	NA
V1	4_tRNA_Arg	Arg-CCG-1	89	66	67	3	0.965101	0.00762643	0.973057	0.00800983	NA
V1	4_tRNA_Arg	Arg-CCG-1	90	67	68	3	0.932019	0.0182782	0.97971	0.0104374	NA
V1	4_tRNA_Arg	Arg-CCG-1	91	68	69	3	0.935163	0.0103657	1	0	NA
V1	4_tRNA_Arg	Arg-CCG-1	92	69	70	3	0.927959	0.0127456	0.995455	0.00454546	NA
V1	4_tRNA_Arg	Arg-CCG-1	93	70	71	3	0.971637	0.00939561	0.997138	0.00249135	NA
V1	4_tRNA_Arg	Arg-CCG-1	94	71	72	3	0.973324	0.00781492	0.997811	0.0022774	NA
V1	4_tRNA_Arg	Arg-CCG-1	95	72	73	3	0.972811	0.00808583	0.99099	0.000139344	NA
V1	4_tRNA_Arg	Arg-CCG-1	96	73	74	3	0.971878	0.00862638	0.960511	0.0141178	NA
V1	4_tRNA_Arg	Arg-CCG-1	97	74	75	3	0.971919	0.00838049	0.949055	0.0150511	NA
V1	4_tRNA_Arg	Arg-CCG-1	98	75	76	2	0.96054	0.00419165	0.790152	0.0567828	NA
V1	4_tRNA_Arg	Arg-CCG-1	99	76	77	2	0.958068	0.000878686	0.675	0.0482118	NA
V1	5_tRNA_Arg	Arg-TCT-1	1	0	NA	NA	NA	NA	NA	NA	NA
V1	5_tRNA_Arg	Arg-TCT-1	2	1	1	2	1	0	0.0766759	0.00770858	NA
V1	5_tRNA_Arg	Arg-TCT-1	3	2	2	2	1	0	0.0781986	0.00784747	NA
V1	5_tRNA_Arg	Arg-TCT-1	4	3	3	2	0.99872	0.00181077	0.0789976	0.00763442	NA
V1	5_tRNA_Arg	Arg-TCT-1	5	4	4	2	0.996183	0.00539776	0.079926	0.00693279	NA
V1	5_tRNA_Arg	Arg-TCT-1	6	5	5	2	1	0	0.0809624	0.00638398	NA
V1	5_tRNA_Arg	Arg-TCT-1	7	6	6	2	0.997491	0.00354884	0.081524	0.00650668	NA
V1	5_tRNA_Arg	Arg-TCT-1	8	7	7	2	0.995132	0.00163428	0.0829599	0.00585135	NA
V1	5_tRNA_Arg	Arg-TCT-1	9	8	8	2	0.950682	0.00468581	0.0851736	0.00562437	NA
V1	5_tRNA_Arg	Arg-TCT-1	10	9	9	2	0.998295	0.00241059	0.0951597	0.000398599	NA
V1	5_tRNA_Arg	Arg-TCT-1	11	10	10	2	0.990934	0.00118125	0.112263	0.0044142	NA
V1	5_tRNA_Arg	Arg-TCT-1	12	11	11	2	0.994119	0.00286227	0.116096	0.00570869	NA
V1	5_tRNA_Arg	Arg-TCT-1	13	12	12	2	0.998086	0.00270663	0.117003	0.00576892	NA
V1	5_tRNA_Arg	Arg-TCT-1	14	13	13	2	0.99521	0.0012922	0.118094	0.00624131	NA
V1	5_tRNA_Arg	Arg-TCT-1	15	14	14	2	0.999059	0.0013304	0.119346	0.00648448	NA
V1	5_tRNA_Arg	Arg-TCT-1	16	15	15	2	0.995802	0.00593653	0.120491	0.00688047	NA
V1	5_tRNA_Arg	Arg-TCT-1	17	16	16	2	0.99734	0.00127149	0.128039	0.00762165	NA
V1	5_tRNA_Arg	Arg-TCT-1	18	17	17	2	0.999137	0.0012202	0.130944	0.0082145	NA
V1	5_tRNA_Arg	Arg-TCT-1	19	17A	NA	NA	NA	NA	NA	NA	NA
V1	5_tRNA_Arg	Arg-TCT-1	20	18	18	2	0.999153	0.00119849	0.134032	0.00921953	NA
V1	5_tRNA_Arg	Arg-TCT-1	21	19	19	2	0.999589	0.000581502	0.136926	0.00781177	NA
V1	5_tRNA_Arg	Arg-TCT-1	22	20	20	2	0.998817	0.00167297	0.141052	0.00600577	NA
V1	5_tRNA_Arg	Arg-TCT-1	23	20A	21	2	0.999238	0.00107709	0.144725	0.00416966	NA
V1	5_tRNA_Arg	Arg-TCT-1	24	20B	NA	NA	NA	NA	NA	NA	NA
V1	5_tRNA_Arg	Arg-TCT-1	25	21	22	2	0.998896	0.00156094	0.151063	0.00595047	NA
V1	5_tRNA_Arg	Arg-TCT-1	26	22	23	2	0.990414	0.00944619	0.158071	0.00745576	NA
V1	5_tRNA_Arg	Arg-TCT-1	27	23	24	2	0.999321	0.000960743	0.164291	0.00738879	NA
V1	5_tRNA_Arg	Arg-TCT-1	28	24	25	2	0.997604	0.000540481	0.165976	0.00702066	NA
V1	5_tRNA_Arg	Arg-TCT-1	29	25	26	2	0.99967	0.000467045	0.16751	0.00552256	NA
V1	5_tRNA_Arg	Arg-TCT-1	30	26	27	3	0.999781	0.000379337	0.138491	0.0515558	NA
V1	5_tRNA_Arg	Arg-TCT-1	31	27	28	2	0.999346	0.000924323	0.168795	0.00504791	NA
V1	5_tRNA_Arg	Arg-TCT-1	32	28	29	2	0.998692	0.00184985	0.168558	0.00471215	NA
V1	5_tRNA_Arg	Arg-TCT-1	33	29	30	2	0.998052	0.00275496	0.169573	0.00461956	NA
V1	5_tRNA_Arg	Arg-TCT-1	34	30	31	3	0.999805	0.000337434	0.149624	0.0537048	NA
V1	5_tRNA_Arg	Arg-TCT-1	35	31	32	3	0.991752	0.000774759	0.148442	0.0540875	NA
V1	5_tRNA_Arg	Arg-TCT-1	36	32	33	2	0.981593	0.0063355	0.176631	0.00939151	s2C
V1	5_tRNA_Arg	Arg-TCT-1	37	33	34	3	0.996406	0.000968258	0.585684	0.0220206	NA
V1	5_tRNA_Arg	Arg-TCT-1	38	34	35	3	0.996803	0.000527486	0.599547	0.0257497	mnm5U
V1	5_tRNA_Arg	Arg-TCT-1	39	35	36	3	0.998041	0.000926979	0.607891	0.0280651	NA
V1	5_tRNA_Arg	Arg-TCT-1	40	36	37	3	0.994784	0.00354578	0.613889	0.0272453	NA
V1	5_tRNA_Arg	Arg-TCT-1	41	37	38	3	0.991439	0.00308822	0.632966	0.0270327	t6A
V1	5_tRNA_Arg	Arg-TCT-1	42	38	39	3	0.997114	0.00184421	0.682483	0.025365	NA
V1	5_tRNA_Arg	Arg-TCT-1	43	39	40	3	0.995085	0.00179068	0.729392	0.0229179	NA
V1	5_tRNA_Arg	Arg-TCT-1	44	40	41	3	0.998641	0.000761892	0.779004	0.0280318	Y
V1	5_tRNA_Arg	Arg-TCT-1	45	41	42	3	0.995596	0.000850655	0.782137	0.0273384	NA
V1	5_tRNA_Arg	Arg-TCT-1	46	42	43	3	0.997143	0.00160776	0.784803	0.0282316	NA
V1	5_tRNA_Arg	Arg-TCT-1	47	43	44	3	0.99895	0.000116058	0.792386	0.0279676	NA
V1	5_tRNA_Arg	Arg-TCT-1	48	44	45	3	0.992531	0.00205129	0.806977	0.028232	NA
V1	5_tRNA_Arg	Arg-TCT-1	49	45	46	3	0.992278	0.00160389	0.827008	0.0180248	NA
V1	5_tRNA_Arg	Arg-TCT-1	50	45A	47	3	0.992418	0.00310616	0.852077	0.0126565	NA
V1	5_tRNA_Arg	Arg-TCT-1	51	45B	48	3	0.994633	0.00174361	0.887047	0.00802379	NA
V1	5_tRNA_Arg	Arg-TCT-1	52	45C	49	3	0.995979	0.00287086	0.906038	0.00454951	NA
V1	5_tRNA_Arg	Arg-TCT-1	53	45D	NA	NA	NA	NA	NA	NA	NA
V1	5_tRNA_Arg	Arg-TCT-1	54	45E	NA	NA	NA	NA	NA	NA	NA
V1	5_tRNA_Arg	Arg-TCT-1	55	45F	NA	NA	NA	NA	NA	NA	NA
V1	5_tRNA_Arg	Arg-TCT-1	56	45G	NA	NA	NA	NA	NA	NA	NA
V1	5_tRNA_Arg	Arg-TCT-1	57	45H	NA	NA	NA	NA	NA	NA	NA
V1	5_tRNA_Arg	Arg-TCT-1	58	45I	NA	NA	NA	NA	NA	NA	NA
V1	5_tRNA_Arg	Arg-TCT-1	59	45J	NA	NA	NA	NA	NA	NA	NA
V1	5_tRNA_Arg	Arg-TCT-1	60	45K	NA	NA	NA	NA	NA	NA	NA
V1	5_tRNA_Arg	Arg-TCT-1	61	45L	NA	NA	NA	NA	NA	NA	NA
V1	5_tRNA_Arg	Arg-TCT-1	62	45M	NA	NA	NA	NA	NA	NA	NA
V1	5_tRNA_Arg	Arg-TCT-1	63	45N	NA	NA	NA	NA	NA	NA	NA
V1	5_tRNA_Arg	Arg-TCT-1	64	45O	NA	NA	NA	NA	NA	NA	NA
V1	5_tRNA_Arg	Arg-TCT-1	65	45P	NA	NA	NA	NA	NA	NA	NA
V1	5_tRNA_Arg	Arg-TCT-1	66	45Q	NA	NA	NA	NA	NA	NA	NA
V1	5_tRNA_Arg	Arg-TCT-1	67	45R	NA	NA	NA	NA	NA	NA	NA
V1	5_tRNA_Arg	Arg-TCT-1	68	45S	NA	NA	NA	NA	NA	NA	NA
V1	5_tRNA_Arg	Arg-TCT-1	69	46	NA	NA	NA	NA	NA	NA	NA
V1	5_tRNA_Arg	Arg-TCT-1	70	47	NA	NA	NA	NA	NA	NA	NA
V1	5_tRNA_Arg	Arg-TCT-1	71	48	NA	NA	NA	NA	NA	NA	NA
V1	5_tRNA_Arg	Arg-TCT-1	72	49	50	3	0.990357	0.00108025	0.916957	0.00614467	NA
V1	5_tRNA_Arg	Arg-TCT-1	73	50	51	3	0.996356	0.00203299	0.938617	0.00505173	NA
V1	5_tRNA_Arg	Arg-TCT-1	74	51	52	3	0.998899	0.000535456	0.944854	0.0058139	NA
V1	5_tRNA_Arg	Arg-TCT-1	75	52	53	3	0.996336	0.00102829	0.947495	0.00599713	NA
V1	5_tRNA_Arg	Arg-TCT-1	76	53	54	3	0.998737	0.000664028	0.951007	0.00460228	NA
V1	5_tRNA_Arg	Arg-TCT-1	77	54	55	3	0.998635	0.0014997	0.952178	0.0048167	m5U
V1	5_tRNA_Arg	Arg-TCT-1	78	55	56	3	0.999421	0.000515973	0.953977	0.00537981	Y
V1	5_tRNA_Arg	Arg-TCT-1	79	56	57	3	0.992166	0.00113174	0.954989	0.00734161	NA
V1	5_tRNA_Arg	Arg-TCT-1	80	57	58	3	0.993642	0.00101507	0.959823	0.00533328	NA
V1	5_tRNA_Arg	Arg-TCT-1	81	58	59	3	0.999834	0.000288315	0.971029	0.00431391	NA
V1	5_tRNA_Arg	Arg-TCT-1	82	59	60	3	0.99916	0.000111247	0.980984	0.00431078	NA
V1	5_tRNA_Arg	Arg-TCT-1	83	60	61	3	0.998774	0.000330466	0.990876	0.00158243	NA
V1	5_tRNA_Arg	Arg-TCT-1	84	61	62	3	0.999445	0.000482661	0.998901	0.00031707	NA
V1	5_tRNA_Arg	Arg-TCT-1	85	62	63	3	0.998434	0.000731048	1	0	NA
V1	5_tRNA_Arg	Arg-TCT-1	86	63	64	3	0.998931	0.000925621	0.99959	0.000382306	NA
V1	5_tRNA_Arg	Arg-TCT-1	87	64	65	3	0.998366	0.00139118	0.997666	0.00140811	NA
V1	5_tRNA_Arg	Arg-TCT-1	88	65	66	3	0.995455	0.00169276	0.99763	0.0013819	NA
V1	5_tRNA_Arg	Arg-TCT-1	89	66	67	3	0.999202	0.000324721	0.997364	0.00114542	NA
V1	5_tRNA_Arg	Arg-TCT-1	90	67	68	3	0.992595	0.00201798	0.994823	0.0011257	NA
V1	5_tRNA_Arg	Arg-TCT-1	91	68	69	3	0.992191	0.00495803	0.995084	0.00224962	NA
V1	5_tRNA_Arg	Arg-TCT-1	92	69	70	3	0.992647	0.00394629	0.993649	0.00213926	NA
V1	5_tRNA_Arg	Arg-TCT-1	93	70	71	3	0.994866	0.00383818	0.993086	0.00128109	NA
V1	5_tRNA_Arg	Arg-TCT-1	94	71	72	3	0.996937	0.00423946	0.992856	0.00151483	NA
V1	5_tRNA_Arg	Arg-TCT-1	95	72	73	3	0.994538	0.00577569	0.985017	0.0041312	NA
V1	5_tRNA_Arg	Arg-TCT-1	96	73	74	3	0.995311	0.00602909	0.951233	0.00325185	NA
V1	5_tRNA_Arg	Arg-TCT-1	97	74	75	3	0.997215	0.00482331	0.941626	0.00470904	NA
V1	5_tRNA_Arg	Arg-TCT-1	98	75	76	3	0.996667	0.0057735	0.814039	0.0198679	NA
V1	5_tRNA_Arg	Arg-TCT-1	99	76	77	3	0.999235	0.0013242	0.728102	0.0333444	NA
V1	7_tRNA_Asn	Asn-GTT-1	1	0	NA	NA	NA	NA	NA	NA	NA
V1	7_tRNA_Asn	Asn-GTT-1	2	1	1	3	1	0	0.300335	0.081313	NA
V1	7_tRNA_Asn	Asn-GTT-1	3	2	2	3	1	0	0.305777	0.0840149	NA
V1	7_tRNA_Asn	Asn-GTT-1	4	3	3	3	0.999164	0.000734246	0.308022	0.0845932	NA
V1	7_tRNA_Asn	Asn-GTT-1	5	4	4	3	0.998454	0.00137604	0.308958	0.0850045	NA
V1	7_tRNA_Asn	Asn-GTT-1	6	5	5	3	0.997586	0.00209424	0.310522	0.0851547	NA
V1	7_tRNA_Asn	Asn-GTT-1	7	6	6	3	0.998836	0.00118743	0.312108	0.0851374	NA
V1	7_tRNA_Asn	Asn-GTT-1	8	7	7	3	0.998187	0.00167969	0.315062	0.0858187	NA
V1	7_tRNA_Asn	Asn-GTT-1	9	8	8	3	0.987741	0.0113546	0.321471	0.0867265	s4U
V1	7_tRNA_Asn	Asn-GTT-1	10	9	9	3	0.999163	0.000737016	0.332852	0.0892253	NA
V1	7_tRNA_Asn	Asn-GTT-1	11	10	10	3	0.994488	0.00480253	0.357599	0.0921462	NA
V1	7_tRNA_Asn	Asn-GTT-1	12	11	11	3	0.998111	0.00166122	0.364932	0.0913153	NA
V1	7_tRNA_Asn	Asn-GTT-1	13	12	12	3	0.999097	0.000794989	0.382864	0.0912772	NA
V1	7_tRNA_Asn	Asn-GTT-1	14	13	13	3	0.996792	0.00279506	0.384855	0.0910684	NA
V1	7_tRNA_Asn	Asn-GTT-1	15	14	14	3	0.998926	0.000939766	0.388989	0.0902444	NA
V1	7_tRNA_Asn	Asn-GTT-1	16	15	15	3	0.997747	0.00208613	0.391002	0.0904466	NA
V1	7_tRNA_Asn	Asn-GTT-1	17	16	16	3	0.999481	0.000450183	0.424487	0.0930123	D
V1	7_tRNA_Asn	Asn-GTT-1	18	17	17	3	0.997669	0.00215474	0.430799	0.0939291	NA
V1	7_tRNA_Asn	Asn-GTT-1	19	17A	NA	NA	NA	NA	NA	NA	NA
V1	7_tRNA_Asn	Asn-GTT-1	20	18	18	3	0.998498	0.00144614	0.435677	0.0943599	NA
V1	7_tRNA_Asn	Asn-GTT-1	21	19	19	3	0.998331	0.00163167	0.44647	0.0910541	NA
V1	7_tRNA_Asn	Asn-GTT-1	22	20	20	3	0.999794	0.000189973	0.455846	0.0900579	D
V1	7_tRNA_Asn	Asn-GTT-1	23	20A	NA	NA	NA	NA	NA	NA	NA
V1	7_tRNA_Asn	Asn-GTT-1	24	20B	NA	NA	NA	NA	NA	NA	NA
V1	7_tRNA_Asn	Asn-GTT-1	25	21	21	3	0.999634	0.000325654	0.468358	0.0909412	NA
V1	7_tRNA_Asn	Asn-GTT-1	26	22	22	3	0.998076	0.0017113	0.475271	0.0911593	NA
V1	7_tRNA_Asn	Asn-GTT-1	27	23	23	3	0.999221	0.000950639	0.481696	0.0895402	NA
V1	7_tRNA_Asn	Asn-GTT-1	28	24	24	3	0.999446	0.000486903	0.484408	0.0899478	NA
V1	7_tRNA_Asn	Asn-GTT-1	29	25	25	3	0.999039	0.000885907	0.485629	0.08986	NA
V1	7_tRNA_Asn	Asn-GTT-1	30	26	26	3	0.998744	0.00115443	0.487382	0.0897454	NA
V1	7_tRNA_Asn	Asn-GTT-1	31	27	27	3	0.998729	0.00115109	0.49092	0.0887056	NA
V1	7_tRNA_Asn	Asn-GTT-1	32	28	28	3	0.998556	0.00125108	0.495184	0.0877095	NA
V1	7_tRNA_Asn	Asn-GTT-1	33	29	29	3	0.997193	0.00243083	0.49739	0.0872339	NA
V1	7_tRNA_Asn	Asn-GTT-1	34	30	30	3	0.99818	0.00158037	0.500025	0.0863958	NA
V1	7_tRNA_Asn	Asn-GTT-1	35	31	31	3	0.999171	0.000810189	0.503257	0.0856561	NA
V1	7_tRNA_Asn	Asn-GTT-1	36	32	32	3	0.993646	0.00550282	0.495312	0.085145	NA
V1	7_tRNA_Asn	Asn-GTT-1	37	33	33	3	0.997124	0.00308697	0.501914	0.083085	NA
V1	7_tRNA_Asn	Asn-GTT-1	38	34	34	3	0.99799	0.00185865	0.51081	0.0830318	Q
V1	7_tRNA_Asn	Asn-GTT-1	39	35	35	3	0.995111	0.00427774	0.522294	0.0824704	NA
V1	7_tRNA_Asn	Asn-GTT-1	40	36	36	3	0.995981	0.00348123	0.53663	0.0825107	NA
V1	7_tRNA_Asn	Asn-GTT-1	41	37	37	3	0.990663	0.00815433	0.557366	0.0847674	t6A
V1	7_tRNA_Asn	Asn-GTT-1	42	38	38	3	0.993686	0.00553469	0.605315	0.0829754	NA
V1	7_tRNA_Asn	Asn-GTT-1	43	39	39	3	0.9804	0.0179002	0.637878	0.0742362	Y
V1	7_tRNA_Asn	Asn-GTT-1	44	40	40	3	0.998643	0.00127735	0.801788	0.0419319	NA
V1	7_tRNA_Asn	Asn-GTT-1	45	41	41	3	0.999153	0.000953877	0.811623	0.0408866	NA
V1	7_tRNA_Asn	Asn-GTT-1	46	42	42	3	0.998454	0.00141033	0.815741	0.0395455	NA
V1	7_tRNA_Asn	Asn-GTT-1	47	43	43	3	0.999159	0.000952096	0.823964	0.036771	NA
V1	7_tRNA_Asn	Asn-GTT-1	48	44	44	3	0.999412	0.000628155	0.832211	0.0362047	NA
V1	7_tRNA_Asn	Asn-GTT-1	49	45	45	3	0.999455	0.00047707	0.843316	0.0339425	NA
V1	7_tRNA_Asn	Asn-GTT-1	50	45A	46	3	0.998667	0.00125828	0.856894	0.0323604	m7G
V1	7_tRNA_Asn	Asn-GTT-1	51	45B	47	3	0.996251	0.00325632	0.872966	0.0298086	NA
V1	7_tRNA_Asn	Asn-GTT-1	52	45C	48	3	0.998001	0.00174927	0.882124	0.0278281	NA
V1	7_tRNA_Asn	Asn-GTT-1	53	45D	NA	NA	NA	NA	NA	NA	NA
V1	7_tRNA_Asn	Asn-GTT-1	54	45E	NA	NA	NA	NA	NA	NA	NA
V1	7_tRNA_Asn	Asn-GTT-1	55	45F	NA	NA	NA	NA	NA	NA	NA
V1	7_tRNA_Asn	Asn-GTT-1	56	45G	NA	NA	NA	NA	NA	NA	NA
V1	7_tRNA_Asn	Asn-GTT-1	57	45H	NA	NA	NA	NA	NA	NA	NA
V1	7_tRNA_Asn	Asn-GTT-1	58	45I	NA	NA	NA	NA	NA	NA	NA
V1	7_tRNA_Asn	Asn-GTT-1	59	45J	NA	NA	NA	NA	NA	NA	NA
V1	7_tRNA_Asn	Asn-GTT-1	60	45K	NA	NA	NA	NA	NA	NA	NA
V1	7_tRNA_Asn	Asn-GTT-1	61	45L	NA	NA	NA	NA	NA	NA	NA
V1	7_tRNA_Asn	Asn-GTT-1	62	45M	NA	NA	NA	NA	NA	NA	NA
V1	7_tRNA_Asn	Asn-GTT-1	63	45N	NA	NA	NA	NA	NA	NA	NA
V1	7_tRNA_Asn	Asn-GTT-1	64	45O	NA	NA	NA	NA	NA	NA	NA
V1	7_tRNA_Asn	Asn-GTT-1	65	45P	NA	NA	NA	NA	NA	NA	NA
V1	7_tRNA_Asn	Asn-GTT-1	66	45Q	NA	NA	NA	NA	NA	NA	NA
V1	7_tRNA_Asn	Asn-GTT-1	67	45R	NA	NA	NA	NA	NA	NA	NA
V1	7_tRNA_Asn	Asn-GTT-1	68	45S	NA	NA	NA	NA	NA	NA	NA
V1	7_tRNA_Asn	Asn-GTT-1	69	46	NA	NA	NA	NA	NA	NA	NA
V1	7_tRNA_Asn	Asn-GTT-1	70	47	NA	NA	NA	NA	NA	NA	NA
V1	7_tRNA_Asn	Asn-GTT-1	71	48	NA	NA	NA	NA	NA	NA	NA
V1	7_tRNA_Asn	Asn-GTT-1	72	49	49	3	0.997751	0.00218909	0.903648	0.0224276	NA
V1	7_tRNA_Asn	Asn-GTT-1	73	50	50	3	0.998126	0.00163372	0.927739	0.0193144	NA
V1	7_tRNA_Asn	Asn-GTT-1	74	51	51	3	0.999209	0.000688154	0.935065	0.0182773	NA
V1	7_tRNA_Asn	Asn-GTT-1	75	52	52	3	0.998084	0.00165895	0.939858	0.0170321	NA
V1	7_tRNA_Asn	Asn-GTT-1	76	53	53	3	0.999001	0.000900803	0.944415	0.0158147	NA
V1	7_tRNA_Asn	Asn-GTT-1	77	54	54	3	0.999084	0.00083165	0.946181	0.0156209	m5U
V1	7_tRNA_Asn	Asn-GTT-1	78	55	55	3	0.999417	0.000628607	0.948255	0.0151293	Y
V1	7_tRNA_Asn	Asn-GTT-1	79	56	56	3	0.996296	0.00368399	0.948924	0.0147757	NA
V1	7_tRNA_Asn	Asn-GTT-1	80	57	57	3	0.998001	0.00188688	0.954505	0.0134465	NA
V1	7_tRNA_Asn	Asn-GTT-1	81	58	58	3	0.999625	0.000374859	0.968849	0.00792292	NA
V1	7_tRNA_Asn	Asn-GTT-1	82	59	59	3	0.996253	0.00332953	0.975799	0.00662684	NA
V1	7_tRNA_Asn	Asn-GTT-1	83	60	60	3	0.999376	0.000544393	0.993437	0.0013188	NA
V1	7_tRNA_Asn	Asn-GTT-1	84	61	61	3	0.998335	0.00148974	0.999012	0.000321925	NA
V1	7_tRNA_Asn	Asn-GTT-1	85	62	62	3	0.999126	0.000943041	0.999769	0.000342805	NA
V1	7_tRNA_Asn	Asn-GTT-1	86	63	63	3	0.999417	0.000519877	0.999974	2.35e-05	NA
V1	7_tRNA_Asn	Asn-GTT-1	87	64	64	3	0.998626	0.0012676	1	0	NA
V1	7_tRNA_Asn	Asn-GTT-1	88	65	65	3	0.999209	0.0007103	0.999773	0.00015746	NA
V1	7_tRNA_Asn	Asn-GTT-1	89	66	66	3	0.998376	0.00144111	0.999262	0.000183692	NA
V1	7_tRNA_Asn	Asn-GTT-1	90	67	67	3	0.999458	0.000564091	0.998706	0.000251921	NA
V1	7_tRNA_Asn	Asn-GTT-1	91	68	68	3	0.997332	0.00322683	0.998617	0.0003552	NA
V1	7_tRNA_Asn	Asn-GTT-1	92	69	69	3	0.9995	0.000500501	0.998071	0.000156077	NA
V1	7_tRNA_Asn	Asn-GTT-1	93	70	70	3	0.998832	0.00125961	0.998401	0.000240004	NA
V1	7_tRNA_Asn	Asn-GTT-1	94	71	71	3	0.998123	0.0019435	0.997405	0.000149738	NA
V1	7_tRNA_Asn	Asn-GTT-1	95	72	72	3	0.999791	0.000191465	0.99034	0.00237126	NA
V1	7_tRNA_Asn	Asn-GTT-1	96	73	73	3	0.998333	0.00144786	0.966925	0.0077624	NA
V1	7_tRNA_Asn	Asn-GTT-1	97	74	74	3	1	0	0.957087	0.00945392	NA
V1	7_tRNA_Asn	Asn-GTT-1	98	75	75	3	1	0	0.8702	0.0292232	NA
V1	7_tRNA_Asn	Asn-GTT-1	99	76	76	3	1	0	0.831184	0.0292922	NA
V1	8_tRNA_Asp	Asp-GTC-1	1	0	NA	NA	NA	NA	NA	NA	NA
V1	8_tRNA_Asp	Asp-GTC-1	2	1	1	3	1	0	0.421243	0.0759504	NA
V1	8_tRNA_Asp	Asp-GTC-1	3	2	2	3	1	0	0.437486	0.0860699	NA
V1	8_tRNA_Asp	Asp-GTC-1	4	3	3	3	0.999412	0.000522444	0.439683	0.0864221	NA
V1	8_tRNA_Asp	Asp-GTC-1	5	4	4	3	0.999493	0.000672617	0.440183	0.0862567	NA
V1	8_tRNA_Asp	Asp-GTC-1	6	5	5	3	0.999327	0.000774368	0.44112	0.0862605	NA
V1	8_tRNA_Asp	Asp-GTC-1	7	6	6	3	0.996306	0.00535337	0.439725	0.0858315	NA
V1	8_tRNA_Asp	Asp-GTC-1	8	7	7	3	0.998583	0.00137853	0.44706	0.0875425	NA
V1	8_tRNA_Asp	Asp-GTC-1	9	8	8	3	0.999092	0.00157355	0.452859	0.0885745	s4U
V1	8_tRNA_Asp	Asp-GTC-1	10	9	9	3	0.999714	0.000253973	0.461657	0.0891858	NA
V1	8_tRNA_Asp	Asp-GTC-1	11	10	10	3	0.998229	0.00178243	0.471589	0.0901203	NA
V1	8_tRNA_Asp	Asp-GTC-1	12	11	11	3	0.999331	0.00105233	0.477708	0.0898439	NA
V1	8_tRNA_Asp	Asp-GTC-1	13	12	12	3	0.999846	0.000265876	0.488072	0.0901281	NA
V1	8_tRNA_Asp	Asp-GTC-1	14	13	13	3	0.999391	0.00105404	0.49251	0.0900515	NA
V1	8_tRNA_Asp	Asp-GTC-1	15	14	14	3	0.99985	0.000260244	0.496631	0.089654	NA
V1	8_tRNA_Asp	Asp-GTC-1	16	15	15	3	0.998366	0.00148692	0.50106	0.0898745	NA
V1	8_tRNA_Asp	Asp-GTC-1	17	16	16	3	1	0	0.526399	0.0926023	D
V1	8_tRNA_Asp	Asp-GTC-1	18	17	17	3	0.999575	0.000736886	0.528374	0.0929028	NA
V1	8_tRNA_Asp	Asp-GTC-1	19	17A	NA	NA	NA	NA	NA	NA	NA
V1	8_tRNA_Asp	Asp-GTC-1	20	18	18	3	0.999435	0.00097856	0.52956	0.0919125	NA
V1	8_tRNA_Asp	Asp-GTC-1	21	19	19	3	0.999221	0.00114091	0.537278	0.0914742	NA
V1	8_tRNA_Asp	Asp-GTC-1	22	20	20	3	0.999861	0.000240462	0.539168	0.0914608	D
V1	8_tRNA_Asp	Asp-GTC-1	23	20A	21	3	0.999793	0.000358454	0.542438	0.0905556	D
V1	8_tRNA_Asp	Asp-GTC-1	24	20B	NA	NA	NA	NA	NA	NA	NA
V1	8_tRNA_Asp	Asp-GTC-1	25	21	22	3	0.999559	0.000414823	0.544821	0.0904781	NA
V1	8_tRNA_Asp	Asp-GTC-1	26	22	23	3	0.999327	0.000861583	0.546164	0.0904121	NA
V1	8_tRNA_Asp	Asp-GTC-1	27	23	24	3	0.999369	0.000551342	0.548795	0.0893328	NA
V1	8_tRNA_Asp	Asp-GTC-1	28	24	25	3	0.999589	0.000356279	0.549634	0.0890925	NA
V1	8_tRNA_Asp	Asp-GTC-1	29	25	26	3	0.99939	0.00105699	0.550092	0.0889607	NA
V1	8_tRNA_Asp	Asp-GTC-1	30	26	27	3	0.999834	0.00028774	0.550571	0.0888622	NA
V1	8_tRNA_Asp	Asp-GTC-1	31	27	28	3	0.999319	0.000712164	0.550834	0.0888541	NA
V1	8_tRNA_Asp	Asp-GTC-1	32	28	29	3	0.999429	0.000610801	0.551643	0.0886429	NA
V1	8_tRNA_Asp	Asp-GTC-1	33	29	30	3	0.999824	0.000207273	0.551843	0.0885625	NA
V1	8_tRNA_Asp	Asp-GTC-1	34	30	31	3	0.999352	0.00101675	0.552152	0.0885592	NA
V1	8_tRNA_Asp	Asp-GTC-1	35	31	32	3	0.998917	0.00137202	0.551924	0.0888081	NA
V1	8_tRNA_Asp	Asp-GTC-1	36	32	33	3	0.999265	0.000966942	0.550481	0.088924	NA
V1	8_tRNA_Asp	Asp-GTC-1	37	33	34	3	0.999323	0.001173	0.551904	0.0887044	NA
V1	8_tRNA_Asp	Asp-GTC-1	38	34	35	3	0.998555	0.00229046	0.548125	0.089154	gluQ
V1	8_tRNA_Asp	Asp-GTC-1	39	35	36	3	0.999193	0.00139822	0.554754	0.0893691	NA
V1	8_tRNA_Asp	Asp-GTC-1	40	36	37	3	0.993311	0.0111571	0.549197	0.0903736	NA
V1	8_tRNA_Asp	Asp-GTC-1	41	37	38	3	0.993484	0.00951258	0.564356	0.0890829	m2A
V1	8_tRNA_Asp	Asp-GTC-1	42	38	39	3	0.978011	0.0372272	0.554758	0.0896532	NA
V1	8_tRNA_Asp	Asp-GTC-1	43	39	40	3	0.999309	0.00119687	0.672304	0.0614401	NA
V1	8_tRNA_Asp	Asp-GTC-1	44	40	41	3	0.998661	0.00171334	0.688235	0.057502	NA
V1	8_tRNA_Asp	Asp-GTC-1	45	41	42	3	0.999613	0.000471206	0.698061	0.0542735	NA
V1	8_tRNA_Asp	Asp-GTC-1	46	42	43	3	0.997596	0.00287942	0.699765	0.0540129	NA
V1	8_tRNA_Asp	Asp-GTC-1	47	43	44	3	0.996895	0.00293471	0.707609	0.0521749	NA
V1	8_tRNA_Asp	Asp-GTC-1	48	44	45	3	0.999018	0.00138973	0.730064	0.048555	NA
V1	8_tRNA_Asp	Asp-GTC-1	49	45	46	3	0.998517	0.00154476	0.741639	0.0469746	NA
V1	8_tRNA_Asp	Asp-GTC-1	50	45A	47	3	0.998588	0.00202993	0.748839	0.044915	m7G
V1	8_tRNA_Asp	Asp-GTC-1	51	45B	48	3	0.99792	0.0033891	0.774688	0.041002	NA
V1	8_tRNA_Asp	Asp-GTC-1	52	45C	49	3	0.997671	0.00237634	0.854855	0.037988	NA
V1	8_tRNA_Asp	Asp-GTC-1	53	45D	NA	NA	NA	NA	NA	NA	NA
V1	8_tRNA_Asp	Asp-GTC-1	54	45E	NA	NA	NA	NA	NA	NA	NA
V1	8_tRNA_Asp	Asp-GTC-1	55	45F	NA	NA	NA	NA	NA	NA	NA
V1	8_tRNA_Asp	Asp-GTC-1	56	45G	NA	NA	NA	NA	NA	NA	NA
V1	8_tRNA_Asp	Asp-GTC-1	57	45H	NA	NA	NA	NA	NA	NA	NA
V1	8_tRNA_Asp	Asp-GTC-1	58	45I	NA	NA	NA	NA	NA	NA	NA
V1	8_tRNA_Asp	Asp-GTC-1	59	45J	NA	NA	NA	NA	NA	NA	NA
V1	8_tRNA_Asp	Asp-GTC-1	60	45K	NA	NA	NA	NA	NA	NA	NA
V1	8_tRNA_Asp	Asp-GTC-1	61	45L	NA	NA	NA	NA	NA	NA	NA
V1	8_tRNA_Asp	Asp-GTC-1	62	45M	NA	NA	NA	NA	NA	NA	NA
V1	8_tRNA_Asp	Asp-GTC-1	63	45N	NA	NA	NA	NA	NA	NA	NA
V1	8_tRNA_Asp	Asp-GTC-1	64	45O	NA	NA	NA	NA	NA	NA	NA
V1	8_tRNA_Asp	Asp-GTC-1	65	45P	NA	NA	NA	NA	NA	NA	NA
V1	8_tRNA_Asp	Asp-GTC-1	66	45Q	NA	NA	NA	NA	NA	NA	NA
V1	8_tRNA_Asp	Asp-GTC-1	67	45R	NA	NA	NA	NA	NA	NA	NA
V1	8_tRNA_Asp	Asp-GTC-1	68	45S	NA	NA	NA	NA	NA	NA	NA
V1	8_tRNA_Asp	Asp-GTC-1	69	46	NA	NA	NA	NA	NA	NA	NA
V1	8_tRNA_Asp	Asp-GTC-1	70	47	NA	NA	NA	NA	NA	NA	NA
V1	8_tRNA_Asp	Asp-GTC-1	71	48	NA	NA	NA	NA	NA	NA	NA
V1	8_tRNA_Asp	Asp-GTC-1	72	49	50	3	0.997837	0.00240319	0.875799	0.0349238	NA
V1	8_tRNA_Asp	Asp-GTC-1	73	50	51	3	0.998586	0.00150717	0.910711	0.0265547	NA
V1	8_tRNA_Asp	Asp-GTC-1	74	51	52	3	0.998501	0.00238465	0.918753	0.0248632	NA
V1	8_tRNA_Asp	Asp-GTC-1	75	52	53	3	0.998626	0.00227353	0.924682	0.0240462	NA
V1	8_tRNA_Asp	Asp-GTC-1	76	53	54	3	0.999292	0.00112	0.928272	0.0233601	NA
V1	8_tRNA_Asp	Asp-GTC-1	77	54	55	3	0.999875	0.000216371	0.930662	0.0232653	m5U
V1	8_tRNA_Asp	Asp-GTC-1	78	55	56	3	0.999792	0.000360573	0.932353	0.0229347	Y
V1	8_tRNA_Asp	Asp-GTC-1	79	56	57	3	0.997669	0.00371877	0.934124	0.0222545	NA
V1	8_tRNA_Asp	Asp-GTC-1	80	57	58	3	0.999418	0.000903561	0.940438	0.0212315	NA
V1	8_tRNA_Asp	Asp-GTC-1	81	58	59	3	0.999792	0.000360438	0.951289	0.0188536	NA
V1	8_tRNA_Asp	Asp-GTC-1	82	59	60	3	0.998836	0.0017047	0.963082	0.0133095	NA
V1	8_tRNA_Asp	Asp-GTC-1	83	60	61	3	0.999667	0.000576558	0.988757	0.00458721	NA
V1	8_tRNA_Asp	Asp-GTC-1	84	61	62	3	0.999584	0.000720607	0.998636	0.000774177	NA
V1	8_tRNA_Asp	Asp-GTC-1	85	62	63	3	0.999293	0.00122488	0.999746	0.000182917	NA
V1	8_tRNA_Asp	Asp-GTC-1	86	63	64	3	0.999875	0.000216209	0.999881	0.000163553	NA
V1	8_tRNA_Asp	Asp-GTC-1	87	64	65	3	0.999376	0.00108091	1	0	NA
V1	8_tRNA_Asp	Asp-GTC-1	88	65	66	3	0.99975	0.000432418	0.999877	0.00013441	Y
V1	8_tRNA_Asp	Asp-GTC-1	89	66	67	3	0.999667	0.000576701	0.999483	0.000189481	NA
V1	8_tRNA_Asp	Asp-GTC-1	90	67	68	3	0.999584	0.000721057	0.998898	0.000338724	NA
V1	8_tRNA_Asp	Asp-GTC-1	91	68	69	3	0.9995	0.000865268	0.998699	0.000344837	NA
V1	8_tRNA_Asp	Asp-GTC-1	92	69	70	3	0.999417	0.00100961	0.998733	0.000394147	NA
V1	8_tRNA_Asp	Asp-GTC-1	93	70	71	3	0.999501	0.000760294	0.998428	0.000397756	NA
V1	8_tRNA_Asp	Asp-GTC-1	94	71	72	3	0.99975	0.000433175	0.997491	0.000636421	NA
V1	8_tRNA_Asp	Asp-GTC-1	95	72	73	3	0.999408	0.000919623	0.98406	0.00310322	NA
V1	8_tRNA_Asp	Asp-GTC-1	96	73	74	3	0.999434	0.000980477	0.959174	0.00564669	NA
V1	8_tRNA_Asp	Asp-GTC-1	97	74	75	3	1	0	0.948988	0.00735096	NA
V1	8_tRNA_Asp	Asp-GTC-1	98	75	76	3	1	0	0.777103	0.0334337	NA
V1	8_tRNA_Asp	Asp-GTC-1	99	76	77	3	1	0	0.708677	0.0356685	NA
V1	9_tRNA_Cys	Cys-GCA-1	1	0	NA	NA	NA	NA	NA	NA	NA
V1	9_tRNA_Cys	Cys-GCA-1	2	1	1	1	1	NA	0.0159724	NA	NA
V1	9_tRNA_Cys	Cys-GCA-1	3	2	2	1	1	NA	0.0167915	NA	NA
V1	9_tRNA_Cys	Cys-GCA-1	4	3	3	1	0.986301	NA	0.017084	NA	NA
V1	9_tRNA_Cys	Cys-GCA-1	5	4	4	1	0.993289	NA	0.0173766	NA	NA
V1	9_tRNA_Cys	Cys-GCA-1	6	5	5	1	0.990066	NA	0.0176691	NA	NA
V1	9_tRNA_Cys	Cys-GCA-1	7	6	6	1	0.996764	NA	0.0180786	NA	NA
V1	9_tRNA_Cys	Cys-GCA-1	8	7	7	1	0.987578	NA	0.0187807	NA	NA
V1	9_tRNA_Cys	Cys-GCA-1	9	8	8	2	0.974615	0.007615	0.0202416	0.00173503	s4U
V1	9_tRNA_Cys	Cys-GCA-1	10	9	9	2	0.998538	0.00206756	0.0209243	0.00137671	NA
V1	9_tRNA_Cys	Cys-GCA-1	11	10	10	2	1	0	0.0225337	0.000922304	NA
V1	9_tRNA_Cys	Cys-GCA-1	12	11	11	2	0.99349	0.00920712	0.0228459	0.000784514	NA
V1	9_tRNA_Cys	Cys-GCA-1	13	12	12	2	0.989735	0.010964	0.0233139	0.000122584	NA
V1	9_tRNA_Cys	Cys-GCA-1	14	13	13	2	0.998786	0.00171628	0.0240747	4.26e-05	NA
V1	9_tRNA_Cys	Cys-GCA-1	15	14	14	2	0.991228	0.0124054	0.0246697	0.000276769	NA
V1	9_tRNA_Cys	Cys-GCA-1	16	15	15	2	0.991935	0.0114049	0.0251477	0.000345495	NA
V1	9_tRNA_Cys	Cys-GCA-1	17	16	16	2	0.996629	0.00476701	0.0257915	0.000345158	NA
V1	9_tRNA_Cys	Cys-GCA-1	18	17	NA	NA	NA	NA	NA	NA	NA
V1	9_tRNA_Cys	Cys-GCA-1	19	17A	NA	NA	NA	NA	NA	NA	NA
V1	9_tRNA_Cys	Cys-GCA-1	20	18	17	2	0.997773	0.0031497	0.0260159	0.000358836	NA
V1	9_tRNA_Cys	Cys-GCA-1	21	19	18	2	0.998975	0.00144899	0.0274788	0.00151688	NA
V1	9_tRNA_Cys	Cys-GCA-1	22	20	19	2	0.992896	0.00154481	0.0275566	0.00223419	D
V1	9_tRNA_Cys	Cys-GCA-1	23	20A	NA	NA	NA	NA	NA	NA	NA
V1	9_tRNA_Cys	Cys-GCA-1	24	20B	NA	NA	NA	NA	NA	NA	NA
V1	9_tRNA_Cys	Cys-GCA-1	25	21	20	2	0.997099	0.00410313	0.0284052	0.00252345	D
V1	9_tRNA_Cys	Cys-GCA-1	26	22	21	2	0.999097	0.00127637	0.0304829	0.00272929	NA
V1	9_tRNA_Cys	Cys-GCA-1	27	23	22	2	0.996522	0.004919	0.0315266	0.00299085	NA
V1	9_tRNA_Cys	Cys-GCA-1	28	24	23	2	1	0	0.0321119	0.00290777	NA
V1	9_tRNA_Cys	Cys-GCA-1	29	25	24	2	0.988159	0.012313	0.0343357	0.00423096	NA
V1	9_tRNA_Cys	Cys-GCA-1	30	26	25	2	0.995071	0.00258517	0.0347551	0.00421694	NA
V1	9_tRNA_Cys	Cys-GCA-1	31	27	26	2	0.992093	0.0017534	0.0352623	0.00432704	NA
V1	9_tRNA_Cys	Cys-GCA-1	32	28	27	2	0.986578	0.00874829	0.0366082	0.0053196	NA
V1	9_tRNA_Cys	Cys-GCA-1	33	29	28	2	0.98433	0.0040291	0.0372521	0.00531926	NA
V1	9_tRNA_Cys	Cys-GCA-1	34	30	29	2	0.995137	0.00174655	0.0417967	0.00931752	NA
V1	9_tRNA_Cys	Cys-GCA-1	35	31	30	2	0.995935	0.00261967	0.044586	0.011744	NA
V1	9_tRNA_Cys	Cys-GCA-1	36	32	31	2	0.991368	0.00433314	0.0445374	0.0110681	Y
V1	9_tRNA_Cys	Cys-GCA-1	37	33	32	2	0.995844	0.0027455	0.0439907	0.0124203	NA
V1	9_tRNA_Cys	Cys-GCA-1	38	34	33	2	0.994919	0.00108397	0.0454442	0.0123506	NA
V1	9_tRNA_Cys	Cys-GCA-1	39	35	34	3	0.990188	0.00867765	0.0459599	0.00923893	NA
V1	9_tRNA_Cys	Cys-GCA-1	40	36	35	3	0.803953	0.0776455	0.0384567	0.00472036	NA
V1	9_tRNA_Cys	Cys-GCA-1	41	37	36	3	0.918693	0.0297232	0.0992142	0.0203202	ms2i6A
V1	9_tRNA_Cys	Cys-GCA-1	42	38	37	3	0.999147	0.0005741	0.887292	0.0126927	NA
V1	9_tRNA_Cys	Cys-GCA-1	43	39	38	3	0.999515	0.000500765	0.932662	0.0107564	Y
V1	9_tRNA_Cys	Cys-GCA-1	44	40	39	3	0.99691	0.000450221	0.947201	0.00999745	NA
V1	9_tRNA_Cys	Cys-GCA-1	45	41	40	3	0.998383	0.000149142	0.949824	0.0100139	NA
V1	9_tRNA_Cys	Cys-GCA-1	46	42	41	3	0.997382	0.000935485	0.953907	0.00900649	NA
V1	9_tRNA_Cys	Cys-GCA-1	47	43	42	3	0.998191	0.000451279	0.956287	0.00939883	NA
V1	9_tRNA_Cys	Cys-GCA-1	48	44	43	3	0.996865	0.00100478	0.959633	0.0113612	NA
V1	9_tRNA_Cys	Cys-GCA-1	49	45	44	3	0.997445	0.00166739	0.967146	0.0109208	NA
V1	9_tRNA_Cys	Cys-GCA-1	50	45A	45	3	0.998723	0.00127965	0.980827	0.00692164	NA
V1	9_tRNA_Cys	Cys-GCA-1	51	45B	46	3	0.994817	0.00199495	0.984321	0.00637207	NA
V1	9_tRNA_Cys	Cys-GCA-1	52	45C	NA	NA	NA	NA	NA	NA	NA
V1	9_tRNA_Cys	Cys-GCA-1	53	45D	NA	NA	NA	NA	NA	NA	NA
V1	9_tRNA_Cys	Cys-GCA-1	54	45E	NA	NA	NA	NA	NA	NA	NA
V1	9_tRNA_Cys	Cys-GCA-1	55	45F	NA	NA	NA	NA	NA	NA	NA
V1	9_tRNA_Cys	Cys-GCA-1	56	45G	NA	NA	NA	NA	NA	NA	NA
V1	9_tRNA_Cys	Cys-GCA-1	57	45H	NA	NA	NA	NA	NA	NA	NA
V1	9_tRNA_Cys	Cys-GCA-1	58	45I	NA	NA	NA	NA	NA	NA	NA
V1	9_tRNA_Cys	Cys-GCA-1	59	45J	NA	NA	NA	NA	NA	NA	NA
V1	9_tRNA_Cys	Cys-GCA-1	60	45K	NA	NA	NA	NA	NA	NA	NA
V1	9_tRNA_Cys	Cys-GCA-1	61	45L	NA	NA	NA	NA	NA	NA	NA
V1	9_tRNA_Cys	Cys-GCA-1	62	45M	NA	NA	NA	NA	NA	NA	NA
V1	9_tRNA_Cys	Cys-GCA-1	63	45N	NA	NA	NA	NA	NA	NA	NA
V1	9_tRNA_Cys	Cys-GCA-1	64	45O	NA	NA	NA	NA	NA	NA	NA
V1	9_tRNA_Cys	Cys-GCA-1	65	45P	NA	NA	NA	NA	NA	NA	NA
V1	9_tRNA_Cys	Cys-GCA-1	66	45Q	NA	NA	NA	NA	NA	NA	NA
V1	9_tRNA_Cys	Cys-GCA-1	67	45R	NA	NA	NA	NA	NA	NA	NA
V1	9_tRNA_Cys	Cys-GCA-1	68	45S	NA	NA	NA	NA	NA	NA	NA
V1	9_tRNA_Cys	Cys-GCA-1	69	46	NA	NA	NA	NA	NA	NA	NA
V1	9_tRNA_Cys	Cys-GCA-1	70	47	NA	NA	NA	NA	NA	NA	NA
V1	9_tRNA_Cys	Cys-GCA-1	71	48	NA	NA	NA	NA	NA	NA	NA
V1	9_tRNA_Cys	Cys-GCA-1	72	49	47	3	0.993441	0.00342698	0.993417	0.00199694	NA
V1	9_tRNA_Cys	Cys-GCA-1	73	50	48	3	0.994159	0.00403049	0.995208	0.00155791	NA
V1	9_tRNA_Cys	Cys-GCA-1	74	51	49	3	0.996413	0.00156047	0.998014	0.00168402	NA
V1	9_tRNA_Cys	Cys-GCA-1	75	52	50	3	0.995783	0.00315741	0.999512	0.000319185	NA
V1	9_tRNA_Cys	Cys-GCA-1	76	53	51	3	0.998037	0.000617848	0.999623	0.000425626	NA
V1	9_tRNA_Cys	Cys-GCA-1	77	54	52	3	0.999074	0.000543873	0.999928	0.000123948	m5U
V1	9_tRNA_Cys	Cys-GCA-1	78	55	53	3	0.999334	0.000588803	0.409695	0.0306879	Y
V1	9_tRNA_Cys	Cys-GCA-1	79	56	54	3	0.990366	0.00219886	0.409301	0.0309481	NA
V1	9_tRNA_Cys	Cys-GCA-1	80	57	55	3	0.997066	0.00173768	0.41171	0.0304616	NA
V1	9_tRNA_Cys	Cys-GCA-1	81	58	56	3	0.995962	0.00256054	0.428492	0.0305419	NA
V1	9_tRNA_Cys	Cys-GCA-1	82	59	57	3	0.988592	0.00184915	0.439836	0.0303095	NA
V1	9_tRNA_Cys	Cys-GCA-1	83	60	58	3	0.992856	0.00100782	0.457888	0.0328525	NA
V1	9_tRNA_Cys	Cys-GCA-1	84	61	59	3	0.986976	0.0029162	0.474858	0.034716	NA
V1	9_tRNA_Cys	Cys-GCA-1	85	62	60	3	0.99595	0.00124013	0.478405	0.0338261	NA
V1	9_tRNA_Cys	Cys-GCA-1	86	63	61	3	0.968438	0.00319263	0.477229	0.0337307	NA
V1	9_tRNA_Cys	Cys-GCA-1	87	64	62	3	0.962729	0.00413669	0.478123	0.0340142	NA
V1	9_tRNA_Cys	Cys-GCA-1	88	65	63	3	0.998967	0.000972089	0.479215	0.0337482	NA
V1	9_tRNA_Cys	Cys-GCA-1	89	66	64	3	0.997593	0.00149454	0.479176	0.0336905	NA
V1	9_tRNA_Cys	Cys-GCA-1	90	67	65	3	0.996395	0.00163428	0.479056	0.0337147	NA
V1	9_tRNA_Cys	Cys-GCA-1	91	68	66	3	0.9972	0.000501248	0.479036	0.0336857	NA
V1	9_tRNA_Cys	Cys-GCA-1	92	69	67	3	0.996814	0.00062786	0.478893	0.0339026	NA
V1	9_tRNA_Cys	Cys-GCA-1	93	70	68	3	0.99545	0.00094044	0.478526	0.0337751	NA
V1	9_tRNA_Cys	Cys-GCA-1	94	71	69	3	0.996973	0.00164685	0.477726	0.0332398	NA
V1	9_tRNA_Cys	Cys-GCA-1	95	72	70	3	0.998801	0.00105032	0.470987	0.0326633	NA
V1	9_tRNA_Cys	Cys-GCA-1	96	73	71	3	0.993755	0.00236357	0.45226	0.0320434	NA
V1	9_tRNA_Cys	Cys-GCA-1	97	74	72	3	0.999324	0.000796161	0.444887	0.0305552	NA
V1	9_tRNA_Cys	Cys-GCA-1	98	75	73	3	0.999194	0.000944924	0.372713	0.0292408	NA
V1	9_tRNA_Cys	Cys-GCA-1	99	76	74	3	0.999858	0.0002461	0.338666	0.0250546	NA
V1	11_tRNA_Gln	Gln-CTG-1	1	0	NA	NA	NA	NA	NA	NA	NA
V1	11_tRNA_Gln	Gln-CTG-1	2	1	1	3	1	0	0.376703	0.104971	NA
V1	11_tRNA_Gln	Gln-CTG-1	3	2	2	3	1	0	0.382523	0.107622	NA
V1	11_tRNA_Gln	Gln-CTG-1	4	3	3	3	0.997156	0.00254985	0.385412	0.108494	NA
V1	11_tRNA_Gln	Gln-CTG-1	5	4	4	3	0.995771	0.00468767	0.386601	0.108517	NA
V1	11_tRNA_Gln	Gln-CTG-1	6	5	5	3	0.997655	0.00205118	0.387766	0.108764	NA
V1	11_tRNA_Gln	Gln-CTG-1	7	6	6	3	0.99916	0.000813953	0.389073	0.108571	NA
V1	11_tRNA_Gln	Gln-CTG-1	8	7	7	3	0.999583	0.000371423	0.391069	0.108923	NA
V1	11_tRNA_Gln	Gln-CTG-1	9	8	8	3	0.980473	0.0184095	0.396173	0.109753	s4U
V1	11_tRNA_Gln	Gln-CTG-1	10	9	9	3	0.996658	0.00313502	0.403748	0.110651	NA
V1	11_tRNA_Gln	Gln-CTG-1	11	10	10	3	0.993628	0.00555877	0.4095	0.111317	NA
V1	11_tRNA_Gln	Gln-CTG-1	12	11	11	3	0.997967	0.00183342	0.41305	0.112337	NA
V1	11_tRNA_Gln	Gln-CTG-1	13	12	12	3	0.998598	0.00128386	0.416069	0.112567	NA
V1	11_tRNA_Gln	Gln-CTG-1	14	13	13	3	0.999329	0.000769313	0.418001	0.112833	NA
V1	11_tRNA_Gln	Gln-CTG-1	15	14	14	3	0.999223	0.000749847	0.420096	0.113076	NA
V1	11_tRNA_Gln	Gln-CTG-1	16	15	15	3	0.997509	0.00228023	0.421714	0.113627	NA
V1	11_tRNA_Gln	Gln-CTG-1	17	16	16	3	0.998003	0.00192983	0.429981	0.112458	NA
V1	11_tRNA_Gln	Gln-CTG-1	18	17	NA	NA	NA	NA	NA	NA	NA
V1	11_tRNA_Gln	Gln-CTG-1	19	17A	NA	NA	NA	NA	NA	NA	NA
V1	11_tRNA_Gln	Gln-CTG-1	20	18	17	3	0.994988	0.00437364	0.433814	0.113627	Gm
V1	11_tRNA_Gln	Gln-CTG-1	21	19	18	3	0.998096	0.00164977	0.44052	0.114208	NA
V1	11_tRNA_Gln	Gln-CTG-1	22	20	19	3	0.999634	0.000328956	0.446699	0.114575	D
V1	11_tRNA_Gln	Gln-CTG-1	23	20A	NA	NA	NA	NA	NA	NA	NA
V1	11_tRNA_Gln	Gln-CTG-1	24	20B	NA	NA	NA	NA	NA	NA	NA
V1	11_tRNA_Gln	Gln-CTG-1	25	21	20	3	0.999843	0.000271099	0.455886	0.115057	NA
V1	11_tRNA_Gln	Gln-CTG-1	26	22	21	3	0.999654	0.000310857	0.475332	0.118105	NA
V1	11_tRNA_Gln	Gln-CTG-1	27	23	22	3	0.993642	0.00571765	0.485097	0.118342	NA
V1	11_tRNA_Gln	Gln-CTG-1	28	24	23	3	0.99595	0.00351291	0.492091	0.116988	NA
V1	11_tRNA_Gln	Gln-CTG-1	29	25	24	3	0.998568	0.00133157	0.494393	0.117005	NA
V1	11_tRNA_Gln	Gln-CTG-1	30	26	25	3	0.999206	0.000827981	0.496671	0.11653	NA
V1	11_tRNA_Gln	Gln-CTG-1	31	27	26	3	0.998852	0.00134168	0.497986	0.11616	NA
V1	11_tRNA_Gln	Gln-CTG-1	32	28	27	3	0.998057	0.0018921	0.499509	0.116168	NA
V1	11_tRNA_Gln	Gln-CTG-1	33	29	28	3	0.998674	0.00137855	0.501665	0.116243	NA
V1	11_tRNA_Gln	Gln-CTG-1	34	30	29	3	0.998383	0.00145818	0.505167	0.115463	NA
V1	11_tRNA_Gln	Gln-CTG-1	35	31	30	3	0.998874	0.0014806	0.508424	0.114223	NA
V1	11_tRNA_Gln	Gln-CTG-1	36	32	31	3	0.998467	0.00135972	0.507647	0.113275	Um
V1	11_tRNA_Gln	Gln-CTG-1	37	33	32	3	0.998451	0.00160805	0.508783	0.113661	NA
V1	11_tRNA_Gln	Gln-CTG-1	38	34	33	3	0.996637	0.00291673	0.510095	0.112345	NA
V1	11_tRNA_Gln	Gln-CTG-1	39	35	34	3	0.997559	0.00221981	0.516612	0.112605	NA
V1	11_tRNA_Gln	Gln-CTG-1	40	36	35	3	0.996704	0.0028671	0.522159	0.112591	NA
V1	11_tRNA_Gln	Gln-CTG-1	41	37	36	3	0.993853	0.00557199	0.536155	0.111884	m2A
V1	11_tRNA_Gln	Gln-CTG-1	42	38	37	3	0.982076	0.0156337	0.617413	0.071222	Y
V1	11_tRNA_Gln	Gln-CTG-1	43	39	38	3	0.995522	0.00390375	0.706473	0.0539399	Y
V1	11_tRNA_Gln	Gln-CTG-1	44	40	39	3	0.997234	0.00265204	0.768587	0.0393587	NA
V1	11_tRNA_Gln	Gln-CTG-1	45	41	40	3	0.99817	0.00160355	0.776373	0.0368823	NA
V1	11_tRNA_Gln	Gln-CTG-1	46	42	41	3	0.997475	0.00219231	0.782899	0.035318	NA
V1	11_tRNA_Gln	Gln-CTG-1	47	43	42	3	0.998469	0.00156324	0.78879	0.0340836	NA
V1	11_tRNA_Gln	Gln-CTG-1	48	44	43	3	0.997217	0.00241651	0.797054	0.0328138	NA
V1	11_tRNA_Gln	Gln-CTG-1	49	45	44	3	0.99896	0.000952312	0.817894	0.0287647	NA
V1	11_tRNA_Gln	Gln-CTG-1	50	45A	45	3	0.999549	0.000594246	0.834581	0.0267114	NA
V1	11_tRNA_Gln	Gln-CTG-1	51	45B	46	3	0.996642	0.00310379	0.868001	0.022149	NA
V1	11_tRNA_Gln	Gln-CTG-1	52	45C	47	3	0.996994	0.00274249	0.881304	0.018014	NA
V1	11_tRNA_Gln	Gln-CTG-1	53	45D	NA	NA	NA	NA	NA	NA	NA
V1	11_tRNA_Gln	Gln-CTG-1	54	45E	NA	NA	NA	NA	NA	NA	NA
V1	11_tRNA_Gln	Gln-CTG-1	55	45F	NA	NA	NA	NA	NA	NA	NA
V1	11_tRNA_Gln	Gln-CTG-1	56	45G	NA	NA	NA	NA	NA	NA	NA
V1	11_tRNA_Gln	Gln-CTG-1	57	45H	NA	NA	NA	NA	NA	NA	NA
V1	11_tRNA_Gln	Gln-CTG-1	58	45I	NA	NA	NA	NA	NA	NA	NA
V1	11_tRNA_Gln	Gln-CTG-1	59	45J	NA	NA	NA	NA	NA	NA	NA
V1	11_tRNA_Gln	Gln-CTG-1	60	45K	NA	NA	NA	NA	NA	NA	NA
V1	11_tRNA_Gln	Gln-CTG-1	61	45L	NA	NA	NA	NA	NA	NA	NA
V1	11_tRNA_Gln	Gln-CTG-1	62	45M	NA	NA	NA	NA	NA	NA	NA
V1	11_tRNA_Gln	Gln-CTG-1	63	45N	NA	NA	NA	NA	NA	NA	NA
V1	11_tRNA_Gln	Gln-CTG-1	64	45O	NA	NA	NA	NA	NA	NA	NA
V1	11_tRNA_Gln	Gln-CTG-1	65	45P	NA	NA	NA	NA	NA	NA	NA
V1	11_tRNA_Gln	Gln-CTG-1	66	45Q	NA	NA	NA	NA	NA	NA	NA
V1	11_tRNA_Gln	Gln-CTG-1	67	45R	NA	NA	NA	NA	NA	NA	NA
V1	11_tRNA_Gln	Gln-CTG-1	68	45S	NA	NA	NA	NA	NA	NA	NA
V1	11_tRNA_Gln	Gln-CTG-1	69	46	NA	NA	NA	NA	NA	NA	NA
V1	11_tRNA_Gln	Gln-CTG-1	70	47	NA	NA	NA	NA	NA	NA	NA
V1	11_tRNA_Gln	Gln-CTG-1	71	48	NA	NA	NA	NA	NA	NA	NA
V1	11_tRNA_Gln	Gln-CTG-1	72	49	48	3	0.997843	0.00193689	0.899685	0.0149319	NA
V1	11_tRNA_Gln	Gln-CTG-1	73	50	49	3	0.996711	0.00296152	0.919341	0.0133602	NA
V1	11_tRNA_Gln	Gln-CTG-1	74	51	50	3	0.999683	0.00038775	0.933628	0.0112632	NA
V1	11_tRNA_Gln	Gln-CTG-1	75	52	51	3	0.997759	0.00208376	0.938445	0.0100034	NA
V1	11_tRNA_Gln	Gln-CTG-1	76	53	52	3	0.999269	0.000641004	0.942495	0.0093141	NA
V1	11_tRNA_Gln	Gln-CTG-1	77	54	53	3	0.999137	0.000803138	0.944753	0.00887805	m5U
V1	11_tRNA_Gln	Gln-CTG-1	78	55	54	3	0.999934	0.000114417	0.946401	0.00844853	Y
V1	11_tRNA_Gln	Gln-CTG-1	79	56	55	3	0.997345	0.00232729	0.948809	0.00825532	NA
V1	11_tRNA_Gln	Gln-CTG-1	80	57	56	3	0.995196	0.00424497	0.953316	0.00773405	NA
V1	11_tRNA_Gln	Gln-CTG-1	81	58	57	3	0.999621	0.000374389	0.962858	0.00664431	NA
V1	11_tRNA_Gln	Gln-CTG-1	82	59	58	3	0.999705	0.000261527	0.971316	0.00487623	NA
V1	11_tRNA_Gln	Gln-CTG-1	83	60	59	3	0.999498	0.000434807	0.988867	0.00212643	NA
V1	11_tRNA_Gln	Gln-CTG-1	84	61	60	3	0.999126	0.000942973	0.998889	0.000503639	NA
V1	11_tRNA_Gln	Gln-CTG-1	85	62	61	3	0.999439	0.000494903	0.999938	0.000107976	NA
V1	11_tRNA_Gln	Gln-CTG-1	86	63	62	3	0.999065	0.000815309	0.999684	0.000283998	NA
V1	11_tRNA_Gln	Gln-CTG-1	87	64	63	3	0.996755	0.00283512	0.999097	0.000226979	NA
V1	11_tRNA_Gln	Gln-CTG-1	88	65	64	3	0.998085	0.00173178	0.998351	0.000482886	NA
V1	11_tRNA_Gln	Gln-CTG-1	89	66	65	3	0.999292	0.000616136	0.998312	0.000529979	NA
V1	11_tRNA_Gln	Gln-CTG-1	90	67	66	3	0.999521	0.000443454	0.998045	0.000620086	NA
V1	11_tRNA_Gln	Gln-CTG-1	91	68	67	3	0.999125	0.000780033	0.99803	0.000683049	NA
V1	11_tRNA_Gln	Gln-CTG-1	92	69	68	3	0.999104	0.000776308	0.997856	0.000528149	NA
V1	11_tRNA_Gln	Gln-CTG-1	93	70	69	3	0.998687	0.00141564	0.997341	0.000624439	NA
V1	11_tRNA_Gln	Gln-CTG-1	94	71	70	3	0.998436	0.00150555	0.995298	0.000709727	NA
V1	11_tRNA_Gln	Gln-CTG-1	95	72	71	3	0.999768	0.000255363	0.98528	0.00225999	NA
V1	11_tRNA_Gln	Gln-CTG-1	96	73	72	3	0.998881	0.000976912	0.964717	0.00379951	NA
V1	11_tRNA_Gln	Gln-CTG-1	97	74	73	3	1	0	0.956742	0.00492594	NA
V1	11_tRNA_Gln	Gln-CTG-1	98	75	74	3	1	0	0.84968	0.0344363	NA
V1	11_tRNA_Gln	Gln-CTG-1	99	76	75	3	1	0	0.807288	0.0340896	NA
V1	10_tRNA_Gln	Gln-TTG-1	1	0	NA	NA	NA	NA	NA	NA	NA
V1	10_tRNA_Gln	Gln-TTG-1	2	1	1	3	1	0	0.290639	0.0745242	NA
V1	10_tRNA_Gln	Gln-TTG-1	3	2	2	3	1	0	0.294793	0.0769321	NA
V1	10_tRNA_Gln	Gln-TTG-1	4	3	3	3	0.995645	0.000890248	0.297782	0.0771983	NA
V1	10_tRNA_Gln	Gln-TTG-1	5	4	4	3	0.995696	0.00010021	0.298983	0.0773909	NA
V1	10_tRNA_Gln	Gln-TTG-1	6	5	5	3	0.996493	0.00143506	0.299918	0.077385	NA
V1	10_tRNA_Gln	Gln-TTG-1	7	6	6	3	0.998551	0.000694229	0.30126	0.077401	NA
V1	10_tRNA_Gln	Gln-TTG-1	8	7	7	3	0.998451	0.000986581	0.302807	0.0774429	NA
V1	10_tRNA_Gln	Gln-TTG-1	9	8	8	3	0.990668	0.00742902	0.306678	0.0784884	s4U
V1	10_tRNA_Gln	Gln-TTG-1	10	9	9	3	0.994771	0.00113632	0.311426	0.0794003	NA
V1	10_tRNA_Gln	Gln-TTG-1	11	10	10	3	0.994908	0.0013271	0.315693	0.0797428	NA
V1	10_tRNA_Gln	Gln-TTG-1	12	11	11	3	0.996265	0.000833474	0.31837	0.0798841	NA
V1	10_tRNA_Gln	Gln-TTG-1	13	12	12	3	0.996962	0.00173822	0.320815	0.0798967	NA
V1	10_tRNA_Gln	Gln-TTG-1	14	13	13	3	0.998732	0.000939215	0.322347	0.0799593	NA
V1	10_tRNA_Gln	Gln-TTG-1	15	14	14	3	0.999236	0.00035615	0.323768	0.0801597	NA
V1	10_tRNA_Gln	Gln-TTG-1	16	15	15	3	0.995985	0.000371051	0.324907	0.0800786	NA
V1	10_tRNA_Gln	Gln-TTG-1	17	16	16	3	0.995442	0.00178613	0.33172	0.0796253	NA
V1	10_tRNA_Gln	Gln-TTG-1	18	17	NA	NA	NA	NA	NA	NA	NA
V1	10_tRNA_Gln	Gln-TTG-1	19	17A	NA	NA	NA	NA	NA	NA	NA
V1	10_tRNA_Gln	Gln-TTG-1	20	18	17	3	0.993873	0.0021523	0.334891	0.0787901	Gm
V1	10_tRNA_Gln	Gln-TTG-1	21	19	18	3	0.997599	0.000538689	0.340015	0.0794054	NA
V1	10_tRNA_Gln	Gln-TTG-1	22	20	19	3	0.99943	0.000211176	0.345111	0.0793356	D
V1	10_tRNA_Gln	Gln-TTG-1	23	20A	NA	NA	NA	NA	NA	NA	NA
V1	10_tRNA_Gln	Gln-TTG-1	24	20B	NA	NA	NA	NA	NA	NA	NA
V1	10_tRNA_Gln	Gln-TTG-1	25	21	20	3	0.998448	0.000498617	0.352595	0.0802662	NA
V1	10_tRNA_Gln	Gln-TTG-1	26	22	21	3	0.998474	0.000529865	0.367918	0.0824881	NA
V1	10_tRNA_Gln	Gln-TTG-1	27	23	22	3	0.992185	0.00202762	0.37405	0.0824944	NA
V1	10_tRNA_Gln	Gln-TTG-1	28	24	23	3	0.994132	0.0015487	0.379691	0.0812373	NA
V1	10_tRNA_Gln	Gln-TTG-1	29	25	24	3	0.997526	0.00143916	0.381882	0.0811074	NA
V1	10_tRNA_Gln	Gln-TTG-1	30	26	25	3	0.998839	0.000170932	0.383269	0.081101	NA
V1	10_tRNA_Gln	Gln-TTG-1	31	27	26	3	0.997954	0.00058573	0.383885	0.0814521	NA
V1	10_tRNA_Gln	Gln-TTG-1	32	28	27	3	0.99817	0.000403013	0.38558	0.0813533	NA
V1	10_tRNA_Gln	Gln-TTG-1	33	29	28	3	0.996702	0.000212928	0.387102	0.0810308	NA
V1	10_tRNA_Gln	Gln-TTG-1	34	30	29	3	0.997243	0.00123087	0.390826	0.0796758	NA
V1	10_tRNA_Gln	Gln-TTG-1	35	31	30	3	0.974398	0.0185128	0.382226	0.0780541	NA
V1	10_tRNA_Gln	Gln-TTG-1	36	32	31	3	0.984712	0.0100883	0.393381	0.0767541	Um
V1	10_tRNA_Gln	Gln-TTG-1	37	33	32	3	0.996467	0.00333691	0.419499	0.0734847	NA
V1	10_tRNA_Gln	Gln-TTG-1	38	34	33	3	0.992796	0.00532688	0.442382	0.0712301	cmnm5s2U
V1	10_tRNA_Gln	Gln-TTG-1	39	35	34	3	0.995781	0.0040715	0.490472	0.0718786	NA
V1	10_tRNA_Gln	Gln-TTG-1	40	36	35	3	0.994773	0.0032469	0.497523	0.0725199	NA
V1	10_tRNA_Gln	Gln-TTG-1	41	37	36	3	0.991145	0.00725369	0.51671	0.0745926	m2A
V1	10_tRNA_Gln	Gln-TTG-1	42	38	37	3	0.988026	0.00843911	0.55506	0.0646102	Y
V1	10_tRNA_Gln	Gln-TTG-1	43	39	38	3	0.989345	0.00456261	0.674167	0.0540064	NA
V1	10_tRNA_Gln	Gln-TTG-1	44	40	39	3	0.99712	0.000674508	0.794647	0.0279583	NA
V1	10_tRNA_Gln	Gln-TTG-1	45	41	40	3	0.997714	0.00100983	0.809371	0.0251213	NA
V1	10_tRNA_Gln	Gln-TTG-1	46	42	41	3	0.99788	0.00066255	0.816293	0.0231515	NA
V1	10_tRNA_Gln	Gln-TTG-1	47	43	42	3	0.997765	0.000643595	0.824016	0.0217327	NA
V1	10_tRNA_Gln	Gln-TTG-1	48	44	43	3	0.996326	0.000283508	0.832059	0.0223803	NA
V1	10_tRNA_Gln	Gln-TTG-1	49	45	44	3	0.997603	0.000291346	0.849081	0.0188067	NA
V1	10_tRNA_Gln	Gln-TTG-1	50	45A	45	3	0.998813	0.000343478	0.864018	0.0180935	NA
V1	10_tRNA_Gln	Gln-TTG-1	51	45B	46	3	0.993895	0.000709728	0.890465	0.0160029	NA
V1	10_tRNA_Gln	Gln-TTG-1	52	45C	47	3	0.996138	0.00260464	0.900152	0.0136445	NA
V1	10_tRNA_Gln	Gln-TTG-1	53	45D	NA	NA	NA	NA	NA	NA	NA
V1	10_tRNA_Gln	Gln-TTG-1	54	45E	NA	NA	NA	NA	NA	NA	NA
V1	10_tRNA_Gln	Gln-TTG-1	55	45F	NA	NA	NA	NA	NA	NA	NA
V1	10_tRNA_Gln	Gln-TTG-1	56	45G	NA	NA	NA	NA	NA	NA	NA
V1	10_tRNA_Gln	Gln-TTG-1	57	45H	NA	NA	NA	NA	NA	NA	NA
V1	10_tRNA_Gln	Gln-TTG-1	58	45I	NA	NA	NA	NA	NA	NA	NA
V1	10_tRNA_Gln	Gln-TTG-1	59	45J	NA	NA	NA	NA	NA	NA	NA
V1	10_tRNA_Gln	Gln-TTG-1	60	45K	NA	NA	NA	NA	NA	NA	NA
V1	10_tRNA_Gln	Gln-TTG-1	61	45L	NA	NA	NA	NA	NA	NA	NA
V1	10_tRNA_Gln	Gln-TTG-1	62	45M	NA	NA	NA	NA	NA	NA	NA
V1	10_tRNA_Gln	Gln-TTG-1	63	45N	NA	NA	NA	NA	NA	NA	NA
V1	10_tRNA_Gln	Gln-TTG-1	64	45O	NA	NA	NA	NA	NA	NA	NA
V1	10_tRNA_Gln	Gln-TTG-1	65	45P	NA	NA	NA	NA	NA	NA	NA
V1	10_tRNA_Gln	Gln-TTG-1	66	45Q	NA	NA	NA	NA	NA	NA	NA
V1	10_tRNA_Gln	Gln-TTG-1	67	45R	NA	NA	NA	NA	NA	NA	NA
V1	10_tRNA_Gln	Gln-TTG-1	68	45S	NA	NA	NA	NA	NA	NA	NA
V1	10_tRNA_Gln	Gln-TTG-1	69	46	NA	NA	NA	NA	NA	NA	NA
V1	10_tRNA_Gln	Gln-TTG-1	70	47	NA	NA	NA	NA	NA	NA	NA
V1	10_tRNA_Gln	Gln-TTG-1	71	48	NA	NA	NA	NA	NA	NA	NA
V1	10_tRNA_Gln	Gln-TTG-1	72	49	48	3	0.99737	0.00092046	0.919161	0.0129582	NA
V1	10_tRNA_Gln	Gln-TTG-1	73	50	49	3	0.998248	0.000509958	0.935758	0.012567	NA
V1	10_tRNA_Gln	Gln-TTG-1	74	51	50	3	0.999458	0.000193564	0.93992	0.0125195	NA
V1	10_tRNA_Gln	Gln-TTG-1	75	52	51	3	0.997821	0.00043598	0.946629	0.0121448	NA
V1	10_tRNA_Gln	Gln-TTG-1	76	53	52	3	0.998115	0.000478189	0.950046	0.0114514	NA
V1	10_tRNA_Gln	Gln-TTG-1	77	54	53	3	0.998882	5.59e-06	0.952414	0.0111637	m5U
V1	10_tRNA_Gln	Gln-TTG-1	78	55	54	3	0.999545	0.000145925	0.954422	0.0111182	Y
V1	10_tRNA_Gln	Gln-TTG-1	79	56	55	3	0.99719	0.000519168	0.956652	0.0101906	NA
V1	10_tRNA_Gln	Gln-TTG-1	80	57	56	3	0.995958	0.000321257	0.961735	0.00948406	NA
V1	10_tRNA_Gln	Gln-TTG-1	81	58	57	3	0.999695	0.000213788	0.975957	0.00654212	NA
V1	10_tRNA_Gln	Gln-TTG-1	82	59	58	3	0.999305	6.65e-05	0.982016	0.00538652	NA
V1	10_tRNA_Gln	Gln-TTG-1	83	60	59	3	0.998769	0.000726456	0.991149	0.00272201	NA
V1	10_tRNA_Gln	Gln-TTG-1	84	61	60	3	0.998645	0.000645826	0.99896	0.000407459	NA
V1	10_tRNA_Gln	Gln-TTG-1	85	62	61	3	0.998159	0.000843359	1	0	NA
V1	10_tRNA_Gln	Gln-TTG-1	86	63	62	3	0.999101	0.00030323	0.99905	0.000614687	NA
V1	10_tRNA_Gln	Gln-TTG-1	87	64	63	3	0.996338	0.000183968	0.999138	0.000520273	NA
V1	10_tRNA_Gln	Gln-TTG-1	88	65	64	3	0.996272	0.00167569	0.99889	0.000582468	NA
V1	10_tRNA_Gln	Gln-TTG-1	89	66	65	3	0.998918	0.000258716	0.998884	0.000665825	NA
V1	10_tRNA_Gln	Gln-TTG-1	90	67	66	3	0.999426	0.000269591	0.998854	0.000618261	NA
V1	10_tRNA_Gln	Gln-TTG-1	91	68	67	3	0.998102	0.000418038	0.998788	0.000625819	NA
V1	10_tRNA_Gln	Gln-TTG-1	92	69	68	3	0.998773	0.000664243	0.998628	0.00064784	NA
V1	10_tRNA_Gln	Gln-TTG-1	93	70	69	3	0.998649	0.000511035	0.998279	0.000702118	NA
V1	10_tRNA_Gln	Gln-TTG-1	94	71	70	3	0.997273	0.00222027	0.995053	0.0014019	NA
V1	10_tRNA_Gln	Gln-TTG-1	95	72	71	3	0.999692	0.000271452	0.986904	0.00275466	NA
V1	10_tRNA_Gln	Gln-TTG-1	96	73	72	3	0.997334	0.0004688	0.96683	0.0029025	NA
V1	10_tRNA_Gln	Gln-TTG-1	97	74	73	3	1	0	0.960168	0.00282156	NA
V1	10_tRNA_Gln	Gln-TTG-1	98	75	74	3	1	0	0.864433	0.0272762	NA
V1	10_tRNA_Gln	Gln-TTG-1	99	76	75	3	1	0	0.824191	0.0269544	NA
V1	12_tRNA_Glu	Glu-TTC-1	1	0	NA	NA	NA	NA	NA	NA	NA
V1	12_tRNA_Glu	Glu-TTC-1	2	1	1	3	1	0	0.279539	0.0757519	NA
V1	12_tRNA_Glu	Glu-TTC-1	3	2	2	3	1	0	0.287149	0.0782364	NA
V1	12_tRNA_Glu	Glu-TTC-1	4	3	3	3	0.996567	0.0021132	0.290687	0.0798483	NA
V1	12_tRNA_Glu	Glu-TTC-1	5	4	4	3	0.997633	0.00171242	0.293193	0.0797566	NA
V1	12_tRNA_Glu	Glu-TTC-1	6	5	5	3	0.995496	0.00207712	0.295187	0.0797141	NA
V1	12_tRNA_Glu	Glu-TTC-1	7	6	6	3	0.994492	0.00218585	0.296602	0.0800957	NA
V1	12_tRNA_Glu	Glu-TTC-1	8	7	7	3	0.974805	0.00234365	0.295099	0.0803667	NA
V1	12_tRNA_Glu	Glu-TTC-1	9	8	8	3	0.994311	0.00224463	0.304534	0.0804706	NA
V1	12_tRNA_Glu	Glu-TTC-1	10	9	9	3	0.998436	0.00092567	0.31166	0.0801711	NA
V1	12_tRNA_Glu	Glu-TTC-1	11	10	10	3	0.997808	0.00118375	0.314274	0.0798308	NA
V1	12_tRNA_Glu	Glu-TTC-1	12	11	11	3	0.997421	0.00121645	0.321774	0.0783154	NA
V1	12_tRNA_Glu	Glu-TTC-1	13	12	12	3	0.993868	0.00416843	0.325865	0.0784276	NA
V1	12_tRNA_Glu	Glu-TTC-1	14	13	13	3	0.998549	0.00114733	0.330775	0.0801003	Y
V1	12_tRNA_Glu	Glu-TTC-1	15	14	14	3	0.998422	0.000985034	0.337367	0.0803528	NA
V1	12_tRNA_Glu	Glu-TTC-1	16	15	15	3	0.98977	0.00572575	0.340438	0.0811251	NA
V1	12_tRNA_Glu	Glu-TTC-1	17	16	16	3	0.996511	0.00173436	0.351149	0.0812748	NA
V1	12_tRNA_Glu	Glu-TTC-1	18	17	NA	NA	NA	NA	NA	NA	NA
V1	12_tRNA_Glu	Glu-TTC-1	19	17A	NA	NA	NA	NA	NA	NA	NA
V1	12_tRNA_Glu	Glu-TTC-1	20	18	17	3	0.996483	0.00201466	0.35631	0.0821337	NA
V1	12_tRNA_Glu	Glu-TTC-1	21	19	18	3	0.995157	0.00333066	0.35962	0.0816116	NA
V1	12_tRNA_Glu	Glu-TTC-1	22	20	19	3	0.995442	0.00242288	0.361695	0.082042	NA
V1	12_tRNA_Glu	Glu-TTC-1	23	20A	20	3	0.99564	0.00273761	0.36469	0.0842346	NA
V1	12_tRNA_Glu	Glu-TTC-1	24	20B	21	3	0.994284	0.00337203	0.36723	0.0849827	NA
V1	12_tRNA_Glu	Glu-TTC-1	25	21	22	3	0.998479	0.000734192	0.373483	0.0850505	NA
V1	12_tRNA_Glu	Glu-TTC-1	26	22	23	3	0.988253	0.0050089	0.378152	0.0861138	NA
V1	12_tRNA_Glu	Glu-TTC-1	27	23	24	3	0.995777	0.00193998	0.402932	0.0904226	NA
V1	12_tRNA_Glu	Glu-TTC-1	28	24	25	3	0.996628	0.00153455	0.408689	0.0898459	NA
V1	12_tRNA_Glu	Glu-TTC-1	29	25	26	3	0.99473	0.00295007	0.410682	0.09056	NA
V1	12_tRNA_Glu	Glu-TTC-1	30	26	27	3	0.999094	0.00106041	0.413516	0.0915874	NA
V1	12_tRNA_Glu	Glu-TTC-1	31	27	28	3	0.996016	0.00193776	0.4135	0.0915679	NA
V1	12_tRNA_Glu	Glu-TTC-1	32	28	29	3	0.987981	0.00451537	0.411324	0.0927403	NA
V1	12_tRNA_Glu	Glu-TTC-1	33	29	30	3	0.995874	0.00163314	0.411402	0.0932651	NA
V1	12_tRNA_Glu	Glu-TTC-1	34	30	31	3	0.997018	0.0011838	0.412517	0.0947778	NA
V1	12_tRNA_Glu	Glu-TTC-1	35	31	32	3	0.997419	0.00128826	0.414652	0.0955885	NA
V1	12_tRNA_Glu	Glu-TTC-1	36	32	33	3	0.995717	0.00307829	0.391287	0.108024	NA
V1	12_tRNA_Glu	Glu-TTC-1	37	33	34	3	0.993414	0.0048913	0.391672	0.109162	NA
V1	12_tRNA_Glu	Glu-TTC-1	38	34	35	3	0.990297	0.00662921	0.398967	0.111122	mnm5s2U
V1	12_tRNA_Glu	Glu-TTC-1	39	35	36	3	0.996727	0.00301478	0.492106	0.119083	NA
V1	12_tRNA_Glu	Glu-TTC-1	40	36	37	3	0.992337	0.00324366	0.517308	0.115371	NA
V1	12_tRNA_Glu	Glu-TTC-1	41	37	38	3	0.990292	0.00559887	0.544226	0.115251	m2A
V1	12_tRNA_Glu	Glu-TTC-1	42	38	39	3	0.9834	0.00555554	0.571955	0.110949	NA
V1	12_tRNA_Glu	Glu-TTC-1	43	39	40	3	0.992142	0.000706728	0.692408	0.116386	NA
V1	12_tRNA_Glu	Glu-TTC-1	44	40	41	3	0.996647	0.00155481	0.722022	0.120158	NA
V1	12_tRNA_Glu	Glu-TTC-1	45	41	42	3	0.997646	0.00102021	0.728178	0.120275	NA
V1	12_tRNA_Glu	Glu-TTC-1	46	42	43	3	0.99626	0.00127736	0.733482	0.12084	NA
V1	12_tRNA_Glu	Glu-TTC-1	47	43	44	3	0.997468	0.00124516	0.739985	0.122198	NA
V1	12_tRNA_Glu	Glu-TTC-1	48	44	45	3	0.997017	0.000600222	0.749592	0.122522	NA
V1	12_tRNA_Glu	Glu-TTC-1	49	45	46	3	0.9989	0.000630027	0.754274	0.121955	NA
V1	12_tRNA_Glu	Glu-TTC-1	50	45A	47	3	0.998865	0.00103687	0.75886	0.122553	NA
V1	12_tRNA_Glu	Glu-TTC-1	51	45B	48	3	0.997031	0.00174107	0.766395	0.122357	NA
V1	12_tRNA_Glu	Glu-TTC-1	52	45C	NA	NA	NA	NA	NA	NA	NA
V1	12_tRNA_Glu	Glu-TTC-1	53	45D	NA	NA	NA	NA	NA	NA	NA
V1	12_tRNA_Glu	Glu-TTC-1	54	45E	NA	NA	NA	NA	NA	NA	NA
V1	12_tRNA_Glu	Glu-TTC-1	55	45F	NA	NA	NA	NA	NA	NA	NA
V1	12_tRNA_Glu	Glu-TTC-1	56	45G	NA	NA	NA	NA	NA	NA	NA
V1	12_tRNA_Glu	Glu-TTC-1	57	45H	NA	NA	NA	NA	NA	NA	NA
V1	12_tRNA_Glu	Glu-TTC-1	58	45I	NA	NA	NA	NA	NA	NA	NA
V1	12_tRNA_Glu	Glu-TTC-1	59	45J	NA	NA	NA	NA	NA	NA	NA
V1	12_tRNA_Glu	Glu-TTC-1	60	45K	NA	NA	NA	NA	NA	NA	NA
V1	12_tRNA_Glu	Glu-TTC-1	61	45L	NA	NA	NA	NA	NA	NA	NA
V1	12_tRNA_Glu	Glu-TTC-1	62	45M	NA	NA	NA	NA	NA	NA	NA
V1	12_tRNA_Glu	Glu-TTC-1	63	45N	NA	NA	NA	NA	NA	NA	NA
V1	12_tRNA_Glu	Glu-TTC-1	64	45O	NA	NA	NA	NA	NA	NA	NA
V1	12_tRNA_Glu	Glu-TTC-1	65	45P	NA	NA	NA	NA	NA	NA	NA
V1	12_tRNA_Glu	Glu-TTC-1	66	45Q	NA	NA	NA	NA	NA	NA	NA
V1	12_tRNA_Glu	Glu-TTC-1	67	45R	NA	NA	NA	NA	NA	NA	NA
V1	12_tRNA_Glu	Glu-TTC-1	68	45S	NA	NA	NA	NA	NA	NA	NA
V1	12_tRNA_Glu	Glu-TTC-1	69	46	NA	NA	NA	NA	NA	NA	NA
V1	12_tRNA_Glu	Glu-TTC-1	70	47	NA	NA	NA	NA	NA	NA	NA
V1	12_tRNA_Glu	Glu-TTC-1	71	48	NA	NA	NA	NA	NA	NA	NA
V1	12_tRNA_Glu	Glu-TTC-1	72	49	49	3	0.996804	0.00187263	0.794054	0.117129	NA
V1	12_tRNA_Glu	Glu-TTC-1	73	50	50	3	0.993853	0.00241307	0.824412	0.117757	NA
V1	12_tRNA_Glu	Glu-TTC-1	74	51	51	3	0.99378	0.00256254	0.832532	0.117865	NA
V1	12_tRNA_Glu	Glu-TTC-1	75	52	52	3	0.994193	0.00363076	0.837929	0.117815	NA
V1	12_tRNA_Glu	Glu-TTC-1	76	53	53	3	0.995414	0.00301847	0.840926	0.117778	NA
V1	12_tRNA_Glu	Glu-TTC-1	77	54	54	3	0.994721	0.00333886	0.847859	0.116624	m5U
V1	12_tRNA_Glu	Glu-TTC-1	78	55	55	3	0.997279	0.00214195	0.858615	0.114752	Y
V1	12_tRNA_Glu	Glu-TTC-1	79	56	56	3	0.991979	0.00597943	0.858055	0.115524	NA
V1	12_tRNA_Glu	Glu-TTC-1	80	57	57	3	0.994314	0.00148877	0.860626	0.111883	NA
V1	12_tRNA_Glu	Glu-TTC-1	81	58	58	3	0.997843	0.00168088	0.873223	0.109454	NA
V1	12_tRNA_Glu	Glu-TTC-1	82	59	59	3	0.996463	0.00247218	0.880965	0.108615	NA
V1	12_tRNA_Glu	Glu-TTC-1	83	60	60	3	0.73506	0.239235	0.98076	0.00232799	NA
V1	12_tRNA_Glu	Glu-TTC-1	84	61	61	3	0.738847	0.235718	0.99716	0.00152742	NA
V1	12_tRNA_Glu	Glu-TTC-1	85	62	62	3	0.730741	0.229462	0.99882	0.000778952	NA
V1	12_tRNA_Glu	Glu-TTC-1	86	63	63	3	0.739494	0.235709	0.999267	0.00126928	NA
V1	12_tRNA_Glu	Glu-TTC-1	87	64	64	3	0.725037	0.222572	0.99764	0.000882931	NA
V1	12_tRNA_Glu	Glu-TTC-1	88	65	65	3	0.725269	0.218681	0.996197	0.00211664	NA
V1	12_tRNA_Glu	Glu-TTC-1	89	66	66	3	0.741349	0.236433	0.99692	0.000432787	NA
V1	12_tRNA_Glu	Glu-TTC-1	90	67	67	3	0.708455	0.207257	0.996675	0.000422252	NA
V1	12_tRNA_Glu	Glu-TTC-1	91	68	68	3	0.690296	0.190365	0.996532	0.00046583	NA
V1	12_tRNA_Glu	Glu-TTC-1	92	69	69	3	0.709622	0.209411	0.995437	0.000947951	NA
V1	12_tRNA_Glu	Glu-TTC-1	93	70	70	3	0.737004	0.232243	0.99377	0.00173521	NA
V1	12_tRNA_Glu	Glu-TTC-1	94	71	71	3	0.742197	0.231275	0.984547	0.00884243	NA
V1	12_tRNA_Glu	Glu-TTC-1	95	72	72	3	0.996629	0.000664307	0.533754	0.00894177	NA
V1	12_tRNA_Glu	Glu-TTC-1	96	73	73	3	0.99721	0.000746751	0.487216	0.00940994	NA
V1	12_tRNA_Glu	Glu-TTC-1	97	74	74	3	0.999455	0.000574158	0.480799	0.0093773	NA
V1	12_tRNA_Glu	Glu-TTC-1	98	75	75	3	0.999333	0.000691061	0.396317	0.0217839	NA
V1	12_tRNA_Glu	Glu-TTC-1	99	76	76	3	0.9995	0.000865917	0.358812	0.0239037	NA
V1	13_tRNA_Gly	Gly-CCC-1	1	0	NA	NA	NA	NA	NA	NA	NA
V1	13_tRNA_Gly	Gly-CCC-1	2	1	1	1	0.981982	NA	0.0674567	NA	NA
V1	13_tRNA_Gly	Gly-CCC-1	3	2	2	1	0.982379	NA	0.068976	NA	NA
V1	13_tRNA_Gly	Gly-CCC-1	4	3	3	1	0.965066	NA	0.0695837	NA	NA
V1	13_tRNA_Gly	Gly-CCC-1	5	4	4	1	0.969432	NA	0.0695837	NA	NA
V1	13_tRNA_Gly	Gly-CCC-1	6	5	5	1	0.978541	NA	0.0707991	NA	NA
V1	13_tRNA_Gly	Gly-CCC-1	7	6	6	1	0.974359	NA	0.071103	NA	NA
V1	13_tRNA_Gly	Gly-CCC-1	8	7	7	1	0.974895	NA	0.0726223	NA	NA
V1	13_tRNA_Gly	Gly-CCC-1	9	8	8	1	0.980159	NA	0.0765725	NA	s4U
V1	13_tRNA_Gly	Gly-CCC-1	10	9	9	1	0.980392	NA	0.077484	NA	NA
V1	13_tRNA_Gly	Gly-CCC-1	11	10	10	1	0.977358	NA	0.0805226	NA	NA
V1	13_tRNA_Gly	Gly-CCC-1	12	11	11	1	1	NA	0.0808265	NA	NA
V1	13_tRNA_Gly	Gly-CCC-1	13	12	12	1	1	NA	0.0820419	NA	NA
V1	13_tRNA_Gly	Gly-CCC-1	14	13	13	1	0.992701	NA	0.0832574	NA	NA
V1	13_tRNA_Gly	Gly-CCC-1	15	14	14	1	0.996416	NA	0.0847767	NA	NA
V1	13_tRNA_Gly	Gly-CCC-1	16	15	15	1	0.996865	NA	0.096931	NA	NA
V1	13_tRNA_Gly	Gly-CCC-1	17	16	16	1	1	NA	0.096931	NA	NA
V1	13_tRNA_Gly	Gly-CCC-1	18	17	NA	NA	NA	NA	NA	NA	NA
V1	13_tRNA_Gly	Gly-CCC-1	19	17A	NA	NA	NA	NA	NA	NA	NA
V1	13_tRNA_Gly	Gly-CCC-1	20	18	17	1	1	NA	0.0975387	NA	NA
V1	13_tRNA_Gly	Gly-CCC-1	21	19	18	1	0.996951	NA	0.0996658	NA	NA
V1	13_tRNA_Gly	Gly-CCC-1	22	20	19	1	1	NA	0.101793	NA	D
V1	13_tRNA_Gly	Gly-CCC-1	23	20A	NA	NA	NA	NA	NA	NA	NA
V1	13_tRNA_Gly	Gly-CCC-1	24	20B	NA	NA	NA	NA	NA	NA	NA
V1	13_tRNA_Gly	Gly-CCC-1	25	21	20	1	0.99705	NA	0.103008	NA	NA
V1	13_tRNA_Gly	Gly-CCC-1	26	22	21	1	0.99422	NA	0.104831	NA	NA
V1	13_tRNA_Gly	Gly-CCC-1	27	23	22	1	1	NA	0.106047	NA	NA
V1	13_tRNA_Gly	Gly-CCC-1	28	24	23	1	0.997159	NA	0.106958	NA	NA
V1	13_tRNA_Gly	Gly-CCC-1	29	25	24	1	1	NA	0.10787	NA	NA
V1	13_tRNA_Gly	Gly-CCC-1	30	26	25	1	0.985994	NA	0.108478	NA	NA
V1	13_tRNA_Gly	Gly-CCC-1	31	27	26	1	1	NA	0.108782	NA	NA
V1	13_tRNA_Gly	Gly-CCC-1	32	28	27	1	0.994429	NA	0.109085	NA	NA
V1	13_tRNA_Gly	Gly-CCC-1	33	29	28	1	1	NA	0.109085	NA	NA
V1	13_tRNA_Gly	Gly-CCC-1	34	30	29	1	0.991643	NA	0.109085	NA	NA
V1	13_tRNA_Gly	Gly-CCC-1	35	31	30	1	0.997238	NA	0.109997	NA	NA
V1	13_tRNA_Gly	Gly-CCC-1	36	32	31	1	0.991573	NA	0.108174	NA	NA
V1	13_tRNA_Gly	Gly-CCC-1	37	33	32	1	0.991279	NA	0.104224	NA	NA
V1	13_tRNA_Gly	Gly-CCC-1	38	34	33	1	0.961877	NA	0.0996658	NA	NA
V1	13_tRNA_Gly	Gly-CCC-1	39	35	34	1	0.97654	NA	0.101185	NA	NA
V1	13_tRNA_Gly	Gly-CCC-1	40	36	35	1	0.994186	NA	0.104224	NA	NA
V1	13_tRNA_Gly	Gly-CCC-1	41	37	36	1	0.985163	NA	0.101185	NA	NA
V1	13_tRNA_Gly	Gly-CCC-1	42	38	37	1	0.98827	NA	0.1024	NA	NA
V1	13_tRNA_Gly	Gly-CCC-1	43	39	38	1	0.962366	NA	0.11182	NA	NA
V1	13_tRNA_Gly	Gly-CCC-1	44	40	39	1	0.964583	NA	0.144029	NA	NA
V1	13_tRNA_Gly	Gly-CCC-1	45	41	40	1	0.957611	NA	0.15588	NA	NA
V1	13_tRNA_Gly	Gly-CCC-1	46	42	41	1	0.973783	NA	0.162261	NA	NA
V1	13_tRNA_Gly	Gly-CCC-1	47	43	42	1	0.984456	NA	0.175023	NA	NA
V1	13_tRNA_Gly	Gly-CCC-1	48	44	43	2	0.998358	0.00232219	0.18584	0.00154614	NA
V1	13_tRNA_Gly	Gly-CCC-1	49	45	44	2	0.999255	0.00105381	0.202671	0.00172357	NA
V1	13_tRNA_Gly	Gly-CCC-1	50	45A	45	2	0.993191	0.00215619	0.223904	0.00865175	NA
V1	13_tRNA_Gly	Gly-CCC-1	51	45B	46	3	0.999368	0.0010945	0.679162	0.0431842	NA
V1	13_tRNA_Gly	Gly-CCC-1	52	45C	NA	NA	NA	NA	NA	NA	NA
V1	13_tRNA_Gly	Gly-CCC-1	53	45D	NA	NA	NA	NA	NA	NA	NA
V1	13_tRNA_Gly	Gly-CCC-1	54	45E	NA	NA	NA	NA	NA	NA	NA
V1	13_tRNA_Gly	Gly-CCC-1	55	45F	NA	NA	NA	NA	NA	NA	NA
V1	13_tRNA_Gly	Gly-CCC-1	56	45G	NA	NA	NA	NA	NA	NA	NA
V1	13_tRNA_Gly	Gly-CCC-1	57	45H	NA	NA	NA	NA	NA	NA	NA
V1	13_tRNA_Gly	Gly-CCC-1	58	45I	NA	NA	NA	NA	NA	NA	NA
V1	13_tRNA_Gly	Gly-CCC-1	59	45J	NA	NA	NA	NA	NA	NA	NA
V1	13_tRNA_Gly	Gly-CCC-1	60	45K	NA	NA	NA	NA	NA	NA	NA
V1	13_tRNA_Gly	Gly-CCC-1	61	45L	NA	NA	NA	NA	NA	NA	NA
V1	13_tRNA_Gly	Gly-CCC-1	62	45M	NA	NA	NA	NA	NA	NA	NA
V1	13_tRNA_Gly	Gly-CCC-1	63	45N	NA	NA	NA	NA	NA	NA	NA
V1	13_tRNA_Gly	Gly-CCC-1	64	45O	NA	NA	NA	NA	NA	NA	NA
V1	13_tRNA_Gly	Gly-CCC-1	65	45P	NA	NA	NA	NA	NA	NA	NA
V1	13_tRNA_Gly	Gly-CCC-1	66	45Q	NA	NA	NA	NA	NA	NA	NA
V1	13_tRNA_Gly	Gly-CCC-1	67	45R	NA	NA	NA	NA	NA	NA	NA
V1	13_tRNA_Gly	Gly-CCC-1	68	45S	NA	NA	NA	NA	NA	NA	NA
V1	13_tRNA_Gly	Gly-CCC-1	69	46	NA	NA	NA	NA	NA	NA	NA
V1	13_tRNA_Gly	Gly-CCC-1	70	47	NA	NA	NA	NA	NA	NA	NA
V1	13_tRNA_Gly	Gly-CCC-1	71	48	NA	NA	NA	NA	NA	NA	NA
V1	13_tRNA_Gly	Gly-CCC-1	72	49	47	3	0.996449	0.00437518	0.721459	0.0408508	NA
V1	13_tRNA_Gly	Gly-CCC-1	73	50	48	3	0.999258	0.00128538	0.846129	0.0289792	NA
V1	13_tRNA_Gly	Gly-CCC-1	74	51	49	3	0.997859	0.00218551	0.854722	0.0258733	NA
V1	13_tRNA_Gly	Gly-CCC-1	75	52	50	3	0.99464	0.00172974	0.886712	0.0215206	NA
V1	13_tRNA_Gly	Gly-CCC-1	76	53	51	3	0.998104	0.00198112	0.898821	0.0221066	NA
V1	13_tRNA_Gly	Gly-CCC-1	77	54	52	3	0.997973	0.00177807	0.905281	0.0226295	m5U
V1	13_tRNA_Gly	Gly-CCC-1	78	55	53	3	0.998777	0.00106501	0.911231	0.0242184	Y
V1	13_tRNA_Gly	Gly-CCC-1	79	56	54	3	0.991903	0.00367832	0.915277	0.0230823	NA
V1	13_tRNA_Gly	Gly-CCC-1	80	57	55	3	0.991707	0.00458562	0.927892	0.0227151	NA
V1	13_tRNA_Gly	Gly-CCC-1	81	58	56	3	0.999153	0.000955783	0.945459	0.020024	NA
V1	13_tRNA_Gly	Gly-CCC-1	82	59	57	3	0.995981	0.00270297	0.960714	0.0120544	NA
V1	13_tRNA_Gly	Gly-CCC-1	83	60	58	3	0.997955	0.00186629	0.98415	0.007507	NA
V1	13_tRNA_Gly	Gly-CCC-1	84	61	59	3	0.997366	0.00273756	0.995158	0.00159	NA
V1	13_tRNA_Gly	Gly-CCC-1	85	62	60	3	0.998583	0.00126487	0.998185	0.00120671	NA
V1	13_tRNA_Gly	Gly-CCC-1	86	63	61	3	0.996058	0.00110134	0.998892	0.0016635	NA
V1	13_tRNA_Gly	Gly-CCC-1	87	64	62	3	0.99879	0.00159798	1	0	NA
V1	13_tRNA_Gly	Gly-CCC-1	88	65	63	3	0.996261	0.00236621	0.999696	0.000526299	NA
V1	13_tRNA_Gly	Gly-CCC-1	89	66	64	3	0.996264	0.003265	0.998892	0.0016635	NA
V1	13_tRNA_Gly	Gly-CCC-1	90	67	65	3	0.99042	0.0048851	0.998182	0.00181489	NA
V1	13_tRNA_Gly	Gly-CCC-1	91	68	66	3	0.998888	0.000974163	0.999595	0.000701732	NA
V1	13_tRNA_Gly	Gly-CCC-1	92	69	67	3	0.997374	0.00070262	0.999595	0.000701732	NA
V1	13_tRNA_Gly	Gly-CCC-1	93	70	68	3	0.996062	0.00465448	0.998081	0.00182381	NA
V1	13_tRNA_Gly	Gly-CCC-1	94	71	69	3	0.998476	0.00263952	0.997676	0.00201783	NA
V1	13_tRNA_Gly	Gly-CCC-1	95	72	70	3	0.999181	0.00141811	0.994741	0.00516812	NA
V1	13_tRNA_Gly	Gly-CCC-1	96	73	71	3	0.994464	0.00419366	0.9466	0.0167752	NA
V1	13_tRNA_Gly	Gly-CCC-1	97	74	72	3	1	0	0.929641	0.0221569	NA
V1	13_tRNA_Gly	Gly-CCC-1	98	75	73	3	1	0	0.869882	0.0348703	NA
V1	13_tRNA_Gly	Gly-CCC-1	99	76	74	3	1	0	0.802756	0.0314085	NA
V1	15_tRNA_Gly	Gly-GCC-1	1	0	NA	NA	NA	NA	NA	NA	NA
V1	15_tRNA_Gly	Gly-GCC-1	2	1	1	3	1	0	0.377697	0.038567	NA
V1	15_tRNA_Gly	Gly-GCC-1	3	2	2	3	1	0	0.387487	0.0437292	NA
V1	15_tRNA_Gly	Gly-GCC-1	4	3	3	3	0.996167	0.0033223	0.391507	0.0439756	NA
V1	15_tRNA_Gly	Gly-GCC-1	5	4	4	3	0.997521	0.00219795	0.394691	0.0440436	NA
V1	15_tRNA_Gly	Gly-GCC-1	6	5	5	3	0.995672	0.00374823	0.396557	0.0443244	NA
V1	15_tRNA_Gly	Gly-GCC-1	7	6	6	3	0.993362	0.00577375	0.395828	0.0439125	NA
V1	15_tRNA_Gly	Gly-GCC-1	8	7	7	3	0.999758	0.000250159	0.405248	0.0457463	NA
V1	15_tRNA_Gly	Gly-GCC-1	9	8	8	3	0.988853	0.00978631	0.411707	0.0468797	s4U
V1	15_tRNA_Gly	Gly-GCC-1	10	9	9	3	0.999705	0.000320718	0.429005	0.0477657	NA
V1	15_tRNA_Gly	Gly-GCC-1	11	10	10	3	0.997434	0.00233875	0.437253	0.048243	NA
V1	15_tRNA_Gly	Gly-GCC-1	12	11	11	3	0.998397	0.00141614	0.440989	0.0486869	NA
V1	15_tRNA_Gly	Gly-GCC-1	13	12	12	3	0.999696	0.00026654	0.443254	0.0491842	NA
V1	15_tRNA_Gly	Gly-GCC-1	14	13	13	3	0.998081	0.00167957	0.449449	0.0495102	NA
V1	15_tRNA_Gly	Gly-GCC-1	15	14	14	3	0.999453	0.000741516	0.456848	0.0490512	NA
V1	15_tRNA_Gly	Gly-GCC-1	16	15	15	3	0.998546	0.00127314	0.459561	0.0492598	NA
V1	15_tRNA_Gly	Gly-GCC-1	17	16	16	3	0.999472	0.000618583	0.526952	0.0573263	D
V1	15_tRNA_Gly	Gly-GCC-1	18	17	17	3	0.999443	0.000508866	0.541107	0.0584641	D
V1	15_tRNA_Gly	Gly-GCC-1	19	17A	NA	NA	NA	NA	NA	NA	NA
V1	15_tRNA_Gly	Gly-GCC-1	20	18	18	3	0.999115	0.000784678	0.549482	0.0590115	NA
V1	15_tRNA_Gly	Gly-GCC-1	21	19	19	3	0.997771	0.00196183	0.561202	0.0562856	NA
V1	15_tRNA_Gly	Gly-GCC-1	22	20	20	3	0.999522	0.000467715	0.576477	0.0561746	D
V1	15_tRNA_Gly	Gly-GCC-1	23	20A	NA	NA	NA	NA	NA	NA	NA
V1	15_tRNA_Gly	Gly-GCC-1	24	20B	NA	NA	NA	NA	NA	NA	NA
V1	15_tRNA_Gly	Gly-GCC-1	25	21	21	3	0.999264	0.000645885	0.59314	0.0567877	NA
V1	15_tRNA_Gly	Gly-GCC-1	26	22	22	3	0.997931	0.00193658	0.606419	0.056343	NA
V1	15_tRNA_Gly	Gly-GCC-1	27	23	23	3	0.999627	0.000448054	0.615829	0.0557147	NA
V1	15_tRNA_Gly	Gly-GCC-1	28	24	24	3	0.999085	0.000937055	0.618797	0.0553131	NA
V1	15_tRNA_Gly	Gly-GCC-1	29	25	25	3	0.998676	0.00136465	0.621245	0.055176	NA
V1	15_tRNA_Gly	Gly-GCC-1	30	26	26	3	0.999308	0.000893873	0.626151	0.0537423	NA
V1	15_tRNA_Gly	Gly-GCC-1	31	27	27	3	0.998077	0.00233661	0.627639	0.053451	NA
V1	15_tRNA_Gly	Gly-GCC-1	32	28	28	3	0.99795	0.00237631	0.62912	0.0535473	NA
V1	15_tRNA_Gly	Gly-GCC-1	33	29	29	3	0.99935	0.0010195	0.631777	0.0534344	NA
V1	15_tRNA_Gly	Gly-GCC-1	34	30	30	3	0.998677	0.00168652	0.632709	0.0533762	NA
V1	15_tRNA_Gly	Gly-GCC-1	35	31	31	3	0.998761	0.00109924	0.634156	0.053346	NA
V1	15_tRNA_Gly	Gly-GCC-1	36	32	32	3	0.997139	0.00329717	0.631037	0.0548453	NA
V1	15_tRNA_Gly	Gly-GCC-1	37	33	33	3	0.99847	0.00213322	0.63099	0.0548053	NA
V1	15_tRNA_Gly	Gly-GCC-1	38	34	34	3	0.997594	0.00305958	0.629747	0.0549439	NA
V1	15_tRNA_Gly	Gly-GCC-1	39	35	35	3	0.995288	0.00447609	0.642928	0.0556282	NA
V1	15_tRNA_Gly	Gly-GCC-1	40	36	36	3	0.997796	0.00309336	0.655743	0.0541878	NA
V1	15_tRNA_Gly	Gly-GCC-1	41	37	37	3	0.996505	0.00363107	0.678034	0.0488739	NA
V1	15_tRNA_Gly	Gly-GCC-1	42	38	38	3	0.999156	0.0014622	0.694989	0.0478118	NA
V1	15_tRNA_Gly	Gly-GCC-1	43	39	39	3	0.998289	0.00198589	0.720377	0.0443391	NA
V1	15_tRNA_Gly	Gly-GCC-1	44	40	40	3	0.997505	0.00219444	0.736688	0.0423008	NA
V1	15_tRNA_Gly	Gly-GCC-1	45	41	41	3	0.998793	0.0014055	0.74094	0.0410973	NA
V1	15_tRNA_Gly	Gly-GCC-1	46	42	42	3	0.998046	0.0017221	0.743082	0.0408086	NA
V1	15_tRNA_Gly	Gly-GCC-1	47	43	43	3	0.996507	0.00327752	0.749979	0.0408931	NA
V1	15_tRNA_Gly	Gly-GCC-1	48	44	44	3	0.998129	0.00165212	0.759615	0.0394236	NA
V1	15_tRNA_Gly	Gly-GCC-1	49	45	45	3	0.997672	0.0021134	0.768313	0.037505	NA
V1	15_tRNA_Gly	Gly-GCC-1	50	45A	46	3	0.997798	0.00193045	0.775949	0.0363728	m7G
V1	15_tRNA_Gly	Gly-GCC-1	51	45B	47	3	0.998297	0.00147607	0.796992	0.0344199	NA
V1	15_tRNA_Gly	Gly-GCC-1	52	45C	48	3	0.997507	0.00217444	0.833994	0.029238	NA
V1	15_tRNA_Gly	Gly-GCC-1	53	45D	NA	NA	NA	NA	NA	NA	NA
V1	15_tRNA_Gly	Gly-GCC-1	54	45E	NA	NA	NA	NA	NA	NA	NA
V1	15_tRNA_Gly	Gly-GCC-1	55	45F	NA	NA	NA	NA	NA	NA	NA
V1	15_tRNA_Gly	Gly-GCC-1	56	45G	NA	NA	NA	NA	NA	NA	NA
V1	15_tRNA_Gly	Gly-GCC-1	57	45H	NA	NA	NA	NA	NA	NA	NA
V1	15_tRNA_Gly	Gly-GCC-1	58	45I	NA	NA	NA	NA	NA	NA	NA
V1	15_tRNA_Gly	Gly-GCC-1	59	45J	NA	NA	NA	NA	NA	NA	NA
V1	15_tRNA_Gly	Gly-GCC-1	60	45K	NA	NA	NA	NA	NA	NA	NA
V1	15_tRNA_Gly	Gly-GCC-1	61	45L	NA	NA	NA	NA	NA	NA	NA
V1	15_tRNA_Gly	Gly-GCC-1	62	45M	NA	NA	NA	NA	NA	NA	NA
V1	15_tRNA_Gly	Gly-GCC-1	63	45N	NA	NA	NA	NA	NA	NA	NA
V1	15_tRNA_Gly	Gly-GCC-1	64	45O	NA	NA	NA	NA	NA	NA	NA
V1	15_tRNA_Gly	Gly-GCC-1	65	45P	NA	NA	NA	NA	NA	NA	NA
V1	15_tRNA_Gly	Gly-GCC-1	66	45Q	NA	NA	NA	NA	NA	NA	NA
V1	15_tRNA_Gly	Gly-GCC-1	67	45R	NA	NA	NA	NA	NA	NA	NA
V1	15_tRNA_Gly	Gly-GCC-1	68	45S	NA	NA	NA	NA	NA	NA	NA
V1	15_tRNA_Gly	Gly-GCC-1	69	46	NA	NA	NA	NA	NA	NA	NA
V1	15_tRNA_Gly	Gly-GCC-1	70	47	NA	NA	NA	NA	NA	NA	NA
V1	15_tRNA_Gly	Gly-GCC-1	71	48	NA	NA	NA	NA	NA	NA	NA
V1	15_tRNA_Gly	Gly-GCC-1	72	49	49	3	0.997633	0.00207185	0.84981	0.0258149	NA
V1	15_tRNA_Gly	Gly-GCC-1	73	50	50	3	0.998338	0.00157141	0.868657	0.0241377	NA
V1	15_tRNA_Gly	Gly-GCC-1	74	51	51	3	0.997924	0.00180319	0.875482	0.0236895	NA
V1	15_tRNA_Gly	Gly-GCC-1	75	52	52	3	0.999667	0.000473042	0.885382	0.0196958	NA
V1	15_tRNA_Gly	Gly-GCC-1	76	53	53	3	0.999169	0.000877406	0.88845	0.0197316	NA
V1	15_tRNA_Gly	Gly-GCC-1	77	54	54	3	0.999544	0.000399902	0.897213	0.0152379	m5U
V1	15_tRNA_Gly	Gly-GCC-1	78	55	55	3	0.999543	0.000400648	0.900392	0.0156467	Y
V1	15_tRNA_Gly	Gly-GCC-1	79	56	56	3	0.995599	0.00405654	0.904522	0.0147706	NA
V1	15_tRNA_Gly	Gly-GCC-1	80	57	57	3	0.998051	0.00181831	0.914779	0.0142103	NA
V1	15_tRNA_Gly	Gly-GCC-1	81	58	58	3	0.999834	0.000143721	0.934208	0.00861492	NA
V1	15_tRNA_Gly	Gly-GCC-1	82	59	59	3	0.99751	0.00219001	0.945832	0.00720047	NA
V1	15_tRNA_Gly	Gly-GCC-1	83	60	60	3	0.999626	0.000374347	0.9837	0.00126359	NA
V1	15_tRNA_Gly	Gly-GCC-1	84	61	61	3	0.999211	0.00075179	0.998203	0.00014096	NA
V1	15_tRNA_Gly	Gly-GCC-1	85	62	62	3	0.999419	0.000562406	0.999736	4.4e-05	NA
V1	15_tRNA_Gly	Gly-GCC-1	86	63	63	3	0.998381	0.0016877	0.999838	0.00015714	NA
V1	15_tRNA_Gly	Gly-GCC-1	87	64	64	3	0.998632	0.00119822	1	0	NA
V1	15_tRNA_Gly	Gly-GCC-1	88	65	65	3	0.999378	0.000542528	0.999986	2.41e-05	NA
V1	15_tRNA_Gly	Gly-GCC-1	89	66	66	3	0.999461	0.000501552	0.999569	8.69e-05	NA
V1	15_tRNA_Gly	Gly-GCC-1	90	67	67	3	0.998341	0.00144275	0.999154	0.000244975	NA
V1	15_tRNA_Gly	Gly-GCC-1	91	68	68	3	0.999004	0.000899319	0.998989	9.25e-05	NA
V1	15_tRNA_Gly	Gly-GCC-1	92	69	69	3	0.999254	0.000691076	0.998838	0.000145698	NA
V1	15_tRNA_Gly	Gly-GCC-1	93	70	70	3	0.999335	0.000628483	0.997787	0.000235565	NA
V1	15_tRNA_Gly	Gly-GCC-1	94	71	71	3	0.998878	0.00106769	0.997873	7.16e-05	NA
V1	15_tRNA_Gly	Gly-GCC-1	95	72	72	3	0.999374	0.000546327	0.991137	0.00137498	NA
V1	15_tRNA_Gly	Gly-GCC-1	96	73	73	3	0.998697	0.0014758	0.954617	0.0108505	NA
V1	15_tRNA_Gly	Gly-GCC-1	97	74	74	3	0.999955	7.72e-05	0.943491	0.0130441	NA
V1	15_tRNA_Gly	Gly-GCC-1	98	75	75	3	0.999953	8.13e-05	0.903284	0.0203787	NA
V1	15_tRNA_Gly	Gly-GCC-1	99	76	76	3	0.999949	8.83e-05	0.841932	0.0268757	NA
V1	14_tRNA_Gly	Gly-TCC-1	1	0	NA	NA	NA	NA	NA	NA	NA
V1	14_tRNA_Gly	Gly-TCC-1	2	1	1	3	0.997163	0.00491362	0.318499	0.0427833	NA
V1	14_tRNA_Gly	Gly-TCC-1	3	2	2	3	0.997187	0.00487215	0.32631	0.0480414	NA
V1	14_tRNA_Gly	Gly-TCC-1	4	3	3	3	0.992553	0.00446982	0.32984	0.0492082	NA
V1	14_tRNA_Gly	Gly-TCC-1	5	4	4	3	0.994669	0.00313816	0.331443	0.050732	NA
V1	14_tRNA_Gly	Gly-TCC-1	6	5	5	3	0.988524	0.00452648	0.332955	0.0512021	NA
V1	14_tRNA_Gly	Gly-TCC-1	7	6	6	3	0.992534	0.00454537	0.333796	0.0519845	NA
V1	14_tRNA_Gly	Gly-TCC-1	8	7	7	3	0.996266	0.00393671	0.336788	0.0517009	NA
V1	14_tRNA_Gly	Gly-TCC-1	9	8	8	3	0.996894	0.00444424	0.340856	0.0543324	NA
V1	14_tRNA_Gly	Gly-TCC-1	10	9	9	3	0.965655	0.0149292	0.34634	0.0566205	NA
V1	14_tRNA_Gly	Gly-TCC-1	11	10	10	3	0.993164	0.00437314	0.354113	0.0577022	NA
V1	14_tRNA_Gly	Gly-TCC-1	12	11	11	3	0.998445	0.00199898	0.360576	0.0573499	NA
V1	14_tRNA_Gly	Gly-TCC-1	13	12	12	3	0.999096	0.000936068	0.366725	0.0581576	NA
V1	14_tRNA_Gly	Gly-TCC-1	14	13	13	3	0.997996	0.00187315	0.369073	0.0581893	NA
V1	14_tRNA_Gly	Gly-TCC-1	15	14	14	3	0.998827	0.00102034	0.371947	0.0569004	NA
V1	14_tRNA_Gly	Gly-TCC-1	16	15	15	3	0.999931	0.000119559	0.373577	0.0569242	NA
V1	14_tRNA_Gly	Gly-TCC-1	17	16	16	3	0.999795	0.000354928	0.379704	0.0557357	NA
V1	14_tRNA_Gly	Gly-TCC-1	18	17	NA	NA	NA	NA	NA	NA	NA
V1	14_tRNA_Gly	Gly-TCC-1	19	17A	NA	NA	NA	NA	NA	NA	NA
V1	14_tRNA_Gly	Gly-TCC-1	20	18	17	3	0.999662	0.000584836	0.383788	0.0573587	NA
V1	14_tRNA_Gly	Gly-TCC-1	21	19	18	3	0.999078	0.000888593	0.391407	0.0566153	NA
V1	14_tRNA_Gly	Gly-TCC-1	22	20	19	3	0.998054	0.00178143	0.399153	0.0544373	NA
V1	14_tRNA_Gly	Gly-TCC-1	23	20A	20	3	0.97027	0.0113927	0.396284	0.0525166	NA
V1	14_tRNA_Gly	Gly-TCC-1	24	20B	NA	NA	NA	NA	NA	NA	NA
V1	14_tRNA_Gly	Gly-TCC-1	25	21	21	3	0.979277	0.00976064	0.422165	0.0609008	NA
V1	14_tRNA_Gly	Gly-TCC-1	26	22	22	3	0.978857	0.00536389	0.437851	0.0694418	NA
V1	14_tRNA_Gly	Gly-TCC-1	27	23	23	3	0.981443	0.00825109	0.461191	0.0746768	NA
V1	14_tRNA_Gly	Gly-TCC-1	28	24	24	3	0.999894	0.000183199	0.503694	0.0784361	NA
V1	14_tRNA_Gly	Gly-TCC-1	29	25	25	3	0.997479	0.000278495	0.507246	0.0815689	NA
V1	14_tRNA_Gly	Gly-TCC-1	30	26	26	3	0.997831	0.00274596	0.511149	0.0845131	NA
V1	14_tRNA_Gly	Gly-TCC-1	31	27	27	3	0.997401	0.000104559	0.512475	0.0866571	NA
V1	14_tRNA_Gly	Gly-TCC-1	32	28	28	3	0.995653	0.0034037	0.515589	0.0855275	NA
V1	14_tRNA_Gly	Gly-TCC-1	33	29	29	3	0.998428	0.00097157	0.519049	0.0861535	NA
V1	14_tRNA_Gly	Gly-TCC-1	34	30	30	3	0.998653	0.00137775	0.52193	0.0861748	NA
V1	14_tRNA_Gly	Gly-TCC-1	35	31	31	3	0.99932	0.000642569	0.524384	0.0879492	NA
V1	14_tRNA_Gly	Gly-TCC-1	36	32	32	3	0.999696	0.0005259	0.522155	0.0902915	NA
V1	14_tRNA_Gly	Gly-TCC-1	37	33	33	3	0.998249	0.00151899	0.52634	0.0889675	NA
V1	14_tRNA_Gly	Gly-TCC-1	38	34	34	3	0.996473	0.00248179	0.530717	0.0872143	mnm5U
V1	14_tRNA_Gly	Gly-TCC-1	39	35	35	3	0.997271	0.000926709	0.541157	0.0885587	NA
V1	14_tRNA_Gly	Gly-TCC-1	40	36	36	3	0.997788	0.00192965	0.569857	0.0895829	NA
V1	14_tRNA_Gly	Gly-TCC-1	41	37	37	3	0.99858	0.00245883	0.588557	0.0841769	NA
V1	14_tRNA_Gly	Gly-TCC-1	42	38	38	3	0.998766	0.00128701	0.600541	0.0842165	NA
V1	14_tRNA_Gly	Gly-TCC-1	43	39	39	3	0.995358	0.00164858	0.612856	0.0865377	NA
V1	14_tRNA_Gly	Gly-TCC-1	44	40	40	3	0.99545	0.000842993	0.622052	0.08532	NA
V1	14_tRNA_Gly	Gly-TCC-1	45	41	41	3	0.995796	0.00124756	0.627019	0.0834465	NA
V1	14_tRNA_Gly	Gly-TCC-1	46	42	42	3	0.99233	0.00182161	0.638843	0.0802346	NA
V1	14_tRNA_Gly	Gly-TCC-1	47	43	43	3	0.997652	0.0021332	0.665665	0.0784051	NA
V1	14_tRNA_Gly	Gly-TCC-1	48	44	44	3	0.992974	0.00193868	0.6816	0.0814245	NA
V1	14_tRNA_Gly	Gly-TCC-1	49	45	45	3	0.989694	0.00356068	0.72223	0.0753548	NA
V1	14_tRNA_Gly	Gly-TCC-1	50	45A	46	3	0.998074	0.00066302	0.81744	0.0486507	NA
V1	14_tRNA_Gly	Gly-TCC-1	51	45B	47	3	0.999875	0.000216479	0.857555	0.0435733	NA
V1	14_tRNA_Gly	Gly-TCC-1	52	45C	NA	NA	NA	NA	NA	NA	NA
V1	14_tRNA_Gly	Gly-TCC-1	53	45D	NA	NA	NA	NA	NA	NA	NA
V1	14_tRNA_Gly	Gly-TCC-1	54	45E	NA	NA	NA	NA	NA	NA	NA
V1	14_tRNA_Gly	Gly-TCC-1	55	45F	NA	NA	NA	NA	NA	NA	NA
V1	14_tRNA_Gly	Gly-TCC-1	56	45G	NA	NA	NA	NA	NA	NA	NA
V1	14_tRNA_Gly	Gly-TCC-1	57	45H	NA	NA	NA	NA	NA	NA	NA
V1	14_tRNA_Gly	Gly-TCC-1	58	45I	NA	NA	NA	NA	NA	NA	NA
V1	14_tRNA_Gly	Gly-TCC-1	59	45J	NA	NA	NA	NA	NA	NA	NA
V1	14_tRNA_Gly	Gly-TCC-1	60	45K	NA	NA	NA	NA	NA	NA	NA
V1	14_tRNA_Gly	Gly-TCC-1	61	45L	NA	NA	NA	NA	NA	NA	NA
V1	14_tRNA_Gly	Gly-TCC-1	62	45M	NA	NA	NA	NA	NA	NA	NA
V1	14_tRNA_Gly	Gly-TCC-1	63	45N	NA	NA	NA	NA	NA	NA	NA
V1	14_tRNA_Gly	Gly-TCC-1	64	45O	NA	NA	NA	NA	NA	NA	NA
V1	14_tRNA_Gly	Gly-TCC-1	65	45P	NA	NA	NA	NA	NA	NA	NA
V1	14_tRNA_Gly	Gly-TCC-1	66	45Q	NA	NA	NA	NA	NA	NA	NA
V1	14_tRNA_Gly	Gly-TCC-1	67	45R	NA	NA	NA	NA	NA	NA	NA
V1	14_tRNA_Gly	Gly-TCC-1	68	45S	NA	NA	NA	NA	NA	NA	NA
V1	14_tRNA_Gly	Gly-TCC-1	69	46	NA	NA	NA	NA	NA	NA	NA
V1	14_tRNA_Gly	Gly-TCC-1	70	47	NA	NA	NA	NA	NA	NA	NA
V1	14_tRNA_Gly	Gly-TCC-1	71	48	NA	NA	NA	NA	NA	NA	NA
V1	14_tRNA_Gly	Gly-TCC-1	72	49	48	3	0.99595	0.0012024	0.871032	0.0405863	NA
V1	14_tRNA_Gly	Gly-TCC-1	73	50	49	3	0.997942	0.000642303	0.907364	0.0374375	NA
V1	14_tRNA_Gly	Gly-TCC-1	74	51	50	3	0.997555	0.00154279	0.917623	0.0336026	NA
V1	14_tRNA_Gly	Gly-TCC-1	75	52	51	3	0.995061	0.00156517	0.943021	0.0169719	NA
V1	14_tRNA_Gly	Gly-TCC-1	76	53	52	3	0.998387	0.000390565	0.951428	0.0116202	NA
V1	14_tRNA_Gly	Gly-TCC-1	77	54	53	3	0.9995	0.000865484	0.964375	0.00576553	m5U
V1	14_tRNA_Gly	Gly-TCC-1	78	55	54	3	0.999564	0.000407345	0.965104	0.00533499	Y
V1	14_tRNA_Gly	Gly-TCC-1	79	56	55	3	0.99483	0.00147155	0.96602	0.00463041	NA
V1	14_tRNA_Gly	Gly-TCC-1	80	57	56	3	0.996567	0.00125291	0.971557	0.0046735	NA
V1	14_tRNA_Gly	Gly-TCC-1	81	58	57	3	0.99975	0.000432634	0.979234	0.00425571	NA
V1	14_tRNA_Gly	Gly-TCC-1	82	59	58	3	0.998085	0.00177188	0.985763	0.00274958	NA
V1	14_tRNA_Gly	Gly-TCC-1	83	60	59	3	0.998633	0.000208197	0.994138	0.00110678	NA
V1	14_tRNA_Gly	Gly-TCC-1	84	61	60	3	0.997648	0.00110389	0.998233	0.000464543	NA
V1	14_tRNA_Gly	Gly-TCC-1	85	62	61	3	0.998895	0.000961262	0.999015	0.000677779	NA
V1	14_tRNA_Gly	Gly-TCC-1	86	63	62	3	0.998378	0.000653226	0.99959	0.000641796	NA
V1	14_tRNA_Gly	Gly-TCC-1	87	64	63	3	0.997446	0.00177057	0.999973	4.61e-05	NA
V1	14_tRNA_Gly	Gly-TCC-1	88	65	64	3	0.998301	0.00252271	1	0	NA
V1	14_tRNA_Gly	Gly-TCC-1	89	66	65	3	0.999189	0.000326643	0.99959	0.000641796	NA
V1	14_tRNA_Gly	Gly-TCC-1	90	67	66	3	0.996888	0.00080548	0.999537	0.000606378	NA
V1	14_tRNA_Gly	Gly-TCC-1	91	68	67	3	0.998416	0.000664927	0.998786	0.000946465	NA
V1	14_tRNA_Gly	Gly-TCC-1	92	69	68	3	0.997363	0.00373597	0.99876	0.000919591	NA
V1	14_tRNA_Gly	Gly-TCC-1	93	70	69	3	0.998208	0.000602832	0.998467	0.000758298	NA
V1	14_tRNA_Gly	Gly-TCC-1	94	71	70	3	0.996239	0.00178381	0.99744	0.00176455	NA
V1	14_tRNA_Gly	Gly-TCC-1	95	72	71	3	0.99888	0.000475602	0.993356	0.00238331	NA
V1	14_tRNA_Gly	Gly-TCC-1	96	73	72	3	0.996815	0.000453189	0.960539	0.00248547	NA
V1	14_tRNA_Gly	Gly-TCC-1	97	74	73	3	0.999549	0.00067238	0.946086	0.00704444	NA
V1	14_tRNA_Gly	Gly-TCC-1	98	75	74	3	0.99952	0.000717893	0.897928	0.0157745	NA
V1	14_tRNA_Gly	Gly-TCC-1	99	76	75	3	0.999951	8.43e-05	0.832272	0.0251516	NA
V1	16_tRNA_His	His-GTG-1	1	0	1	3	1	0	0.299967	0.0722294	NA
V1	16_tRNA_His	His-GTG-1	2	1	2	3	1	0	0.301182	0.0722459	NA
V1	16_tRNA_His	His-GTG-1	3	2	3	3	0.998294	0.000780169	0.302302	0.0724859	NA
V1	16_tRNA_His	His-GTG-1	4	3	4	3	0.998399	0.000220967	0.303001	0.0724357	NA
V1	16_tRNA_His	His-GTG-1	5	4	5	3	0.998785	0.000594031	0.303299	0.0724527	NA
V1	16_tRNA_His	His-GTG-1	6	5	6	3	0.996922	0.00311366	0.302898	0.072022	NA
V1	16_tRNA_His	His-GTG-1	7	6	7	3	0.997299	0.00276423	0.304049	0.0722414	NA
V1	16_tRNA_His	His-GTG-1	8	7	8	3	0.988705	0.00864459	0.308228	0.0727473	NA
V1	16_tRNA_His	His-GTG-1	9	8	9	3	0.999265	0.000353646	0.32261	0.0757239	s4U
V1	16_tRNA_His	His-GTG-1	10	9	10	3	0.997899	0.000753914	0.337866	0.0775109	NA
V1	16_tRNA_His	His-GTG-1	11	10	11	3	0.997985	0.000834767	0.340183	0.0772955	NA
V1	16_tRNA_His	His-GTG-1	12	11	12	3	0.99869	0.00114552	0.341457	0.0775874	NA
V1	16_tRNA_His	His-GTG-1	13	12	13	3	0.996678	0.0012866	0.343427	0.0777534	NA
V1	16_tRNA_His	His-GTG-1	14	13	14	3	0.999396	0.00012522	0.344643	0.0775898	NA
V1	16_tRNA_His	His-GTG-1	15	14	15	3	0.998501	0.000716759	0.345668	0.0778746	NA
V1	16_tRNA_His	His-GTG-1	16	15	16	3	0.998938	0.00110548	0.368875	0.0779631	NA
V1	16_tRNA_His	His-GTG-1	17	16	17	3	0.999588	0.000141455	0.373629	0.078179	D
V1	16_tRNA_His	His-GTG-1	18	17	18	3	0.998574	0.00101636	0.376184	0.0784677	D
V1	16_tRNA_His	His-GTG-1	19	17A	NA	NA	NA	NA	NA	NA	NA
V1	16_tRNA_His	His-GTG-1	20	18	19	3	0.997876	0.00190304	0.38201	0.077141	NA
V1	16_tRNA_His	His-GTG-1	21	19	20	3	0.999266	0.000539255	0.386134	0.0762472	NA
V1	16_tRNA_His	His-GTG-1	22	20	21	3	0.999342	0.000357945	0.39144	0.0765765	D
V1	16_tRNA_His	His-GTG-1	23	20A	NA	NA	NA	NA	NA	NA	NA
V1	16_tRNA_His	His-GTG-1	24	20B	NA	NA	NA	NA	NA	NA	NA
V1	16_tRNA_His	His-GTG-1	25	21	22	3	0.995917	0.00202789	0.394363	0.0766923	NA
V1	16_tRNA_His	His-GTG-1	26	22	23	3	0.99841	0.00138655	0.397799	0.0766712	NA
V1	16_tRNA_His	His-GTG-1	27	23	24	3	0.998434	0.00103557	0.398551	0.0767401	NA
V1	16_tRNA_His	His-GTG-1	28	24	25	3	0.998559	0.000748057	0.399423	0.0768195	NA
V1	16_tRNA_His	His-GTG-1	29	25	26	3	0.999493	0.000674673	0.400844	0.0769277	NA
V1	16_tRNA_His	His-GTG-1	30	26	27	3	0.998453	0.00112906	0.401876	0.0767839	NA
V1	16_tRNA_His	His-GTG-1	31	27	28	3	0.999653	0.000193553	0.403609	0.0772718	NA
V1	16_tRNA_His	His-GTG-1	32	28	29	3	0.998495	0.00128079	0.404616	0.0773273	NA
V1	16_tRNA_His	His-GTG-1	33	29	30	3	0.99759	0.00133751	0.407949	0.0761025	NA
V1	16_tRNA_His	His-GTG-1	34	30	31	3	0.999128	0.000606528	0.411991	0.0749468	NA
V1	16_tRNA_His	His-GTG-1	35	31	32	3	0.997921	0.00235611	0.412392	0.0741967	NA
V1	16_tRNA_His	His-GTG-1	36	32	33	3	0.997597	0.00221966	0.409198	0.0730746	NA
V1	16_tRNA_His	His-GTG-1	37	33	34	3	0.997762	0.00218106	0.410687	0.0728457	NA
V1	16_tRNA_His	His-GTG-1	38	34	35	3	0.998483	0.00149927	0.416731	0.0724641	Q
V1	16_tRNA_His	His-GTG-1	39	35	36	3	0.99727	0.00226551	0.418553	0.0723359	NA
V1	16_tRNA_His	His-GTG-1	40	36	37	3	0.995561	0.00302786	0.42972	0.0735926	NA
V1	16_tRNA_His	His-GTG-1	41	37	38	3	0.978031	0.0192858	0.453625	0.0617943	m2A
V1	16_tRNA_His	His-GTG-1	42	38	39	3	0.995065	0.00417301	0.490098	0.05619	Y
V1	16_tRNA_His	His-GTG-1	43	39	40	3	0.99667	0.00254067	0.512141	0.0504452	Y
V1	16_tRNA_His	His-GTG-1	44	40	41	3	0.998129	0.00105936	0.515158	0.0500434	NA
V1	16_tRNA_His	His-GTG-1	45	41	42	3	0.99941	0.000348615	0.520198	0.0490852	NA
V1	16_tRNA_His	His-GTG-1	46	42	43	3	0.998365	0.00113064	0.522823	0.0479797	NA
V1	16_tRNA_His	His-GTG-1	47	43	44	3	0.999349	0.000643622	0.531858	0.0460599	NA
V1	16_tRNA_His	His-GTG-1	48	44	45	3	0.998738	0.00113751	0.541457	0.0434611	NA
V1	16_tRNA_His	His-GTG-1	49	45	46	3	0.998801	0.000718499	0.552884	0.0423031	NA
V1	16_tRNA_His	His-GTG-1	50	45A	47	3	0.997918	0.0014615	0.577673	0.0377249	m7G
V1	16_tRNA_His	His-GTG-1	51	45B	48	3	0.996551	0.00139667	0.879105	0.0197673	NA
V1	16_tRNA_His	His-GTG-1	52	45C	49	3	0.997012	0.00151822	0.898446	0.0213424	NA
V1	16_tRNA_His	His-GTG-1	53	45D	NA	NA	NA	NA	NA	NA	NA
V1	16_tRNA_His	His-GTG-1	54	45E	NA	NA	NA	NA	NA	NA	NA
V1	16_tRNA_His	His-GTG-1	55	45F	NA	NA	NA	NA	NA	NA	NA
V1	16_tRNA_His	His-GTG-1	56	45G	NA	NA	NA	NA	NA	NA	NA
V1	16_tRNA_His	His-GTG-1	57	45H	NA	NA	NA	NA	NA	NA	NA
V1	16_tRNA_His	His-GTG-1	58	45I	NA	NA	NA	NA	NA	NA	NA
V1	16_tRNA_His	His-GTG-1	59	45J	NA	NA	NA	NA	NA	NA	NA
V1	16_tRNA_His	His-GTG-1	60	45K	NA	NA	NA	NA	NA	NA	NA
V1	16_tRNA_His	His-GTG-1	61	45L	NA	NA	NA	NA	NA	NA	NA
V1	16_tRNA_His	His-GTG-1	62	45M	NA	NA	NA	NA	NA	NA	NA
V1	16_tRNA_His	His-GTG-1	63	45N	NA	NA	NA	NA	NA	NA	NA
V1	16_tRNA_His	His-GTG-1	64	45O	NA	NA	NA	NA	NA	NA	NA
V1	16_tRNA_His	His-GTG-1	65	45P	NA	NA	NA	NA	NA	NA	NA
V1	16_tRNA_His	His-GTG-1	66	45Q	NA	NA	NA	NA	NA	NA	NA
V1	16_tRNA_His	His-GTG-1	67	45R	NA	NA	NA	NA	NA	NA	NA
V1	16_tRNA_His	His-GTG-1	68	45S	NA	NA	NA	NA	NA	NA	NA
V1	16_tRNA_His	His-GTG-1	69	46	NA	NA	NA	NA	NA	NA	NA
V1	16_tRNA_His	His-GTG-1	70	47	NA	NA	NA	NA	NA	NA	NA
V1	16_tRNA_His	His-GTG-1	71	48	NA	NA	NA	NA	NA	NA	NA
V1	16_tRNA_His	His-GTG-1	72	49	50	3	0.999099	0.000826611	0.924556	0.0126963	NA
V1	16_tRNA_His	His-GTG-1	73	50	51	3	0.998194	0.000709413	0.930391	0.0123352	NA
V1	16_tRNA_His	His-GTG-1	74	51	52	3	0.997546	0.00132687	0.941977	0.0120354	NA
V1	16_tRNA_His	His-GTG-1	75	52	53	3	0.998077	0.000488082	0.945338	0.0113488	NA
V1	16_tRNA_His	His-GTG-1	76	53	54	3	0.999193	0.000997639	0.946959	0.0109511	NA
V1	16_tRNA_His	His-GTG-1	77	54	55	3	0.999842	0.000176888	0.948366	0.0110142	m5U
V1	16_tRNA_His	His-GTG-1	78	55	56	3	0.995384	0.00115633	0.950177	0.0106132	Y
V1	16_tRNA_His	His-GTG-1	79	56	57	3	0.996206	0.00308772	0.954719	0.010203	NA
V1	16_tRNA_His	His-GTG-1	80	57	58	3	0.999481	0.000236371	0.965427	0.00806255	NA
V1	16_tRNA_His	His-GTG-1	81	58	59	3	0.999483	0.000342367	0.974193	0.00665592	NA
V1	16_tRNA_His	His-GTG-1	82	59	60	3	0.999346	0.000670082	0.988901	0.00244043	NA
V1	16_tRNA_His	His-GTG-1	83	60	61	3	0.999059	0.000913323	0.998798	0.00091301	NA
V1	16_tRNA_His	His-GTG-1	84	61	62	3	0.999018	0.000919934	0.999908	0.000159471	NA
V1	16_tRNA_His	His-GTG-1	85	62	63	3	0.999197	0.000588301	0.99966	0.00045313	NA
V1	16_tRNA_His	His-GTG-1	86	63	64	3	0.999196	0.00069733	0.999286	0.000350892	NA
V1	16_tRNA_His	His-GTG-1	87	64	65	3	0.999432	0.000386375	0.999265	0.000475931	NA
V1	16_tRNA_His	His-GTG-1	88	65	66	3	0.999377	0.000449255	0.999125	0.000220033	NA
V1	16_tRNA_His	His-GTG-1	89	66	67	3	0.999432	0.000492426	0.999278	0.000207317	NA
V1	16_tRNA_His	His-GTG-1	90	67	68	3	0.998656	0.0013283	0.998763	0.000140093	NA
V1	16_tRNA_His	His-GTG-1	91	68	69	3	0.999113	0.00078682	0.998717	0.00011893	NA
V1	16_tRNA_His	His-GTG-1	92	69	70	3	0.999099	0.00069143	0.998144	0.000320796	NA
V1	16_tRNA_His	His-GTG-1	93	70	71	3	0.998947	0.00108052	0.997765	7.64e-05	NA
V1	16_tRNA_His	His-GTG-1	94	71	72	3	0.999708	0.000260155	0.996038	0.000539899	NA
V1	16_tRNA_His	His-GTG-1	95	72	73	3	0.999021	0.000655342	0.988858	0.00145583	NA
V1	16_tRNA_His	His-GTG-1	96	73	74	3	0.9999	8.96e-05	0.966968	0.00548249	NA
V1	16_tRNA_His	His-GTG-1	97	74	75	3	0.999896	9.26e-05	0.938286	0.0103921	NA
V1	16_tRNA_His	His-GTG-1	98	75	76	3	0.999886	0.000102194	0.852246	0.0176012	NA
V1	16_tRNA_His	His-GTG-1	99	76	77	NA	NA	NA	NA	NA	NA
V1	17_tRNA_Ile	Ile-GAT-1	1	0	NA	NA	NA	NA	NA	NA	NA
V1	17_tRNA_Ile	Ile-GAT-1	2	1	1	3	1	0	0.468158	0.098525	NA
V1	17_tRNA_Ile	Ile-GAT-1	3	2	2	3	1	0	0.480976	0.102758	NA
V1	17_tRNA_Ile	Ile-GAT-1	4	3	3	3	0.994545	0.00475552	0.48531	0.102218	NA
V1	17_tRNA_Ile	Ile-GAT-1	5	4	4	3	0.999374	0.000561651	0.487901	0.102055	NA
V1	17_tRNA_Ile	Ile-GAT-1	6	5	5	3	0.995003	0.0043465	0.490155	0.100515	NA
V1	17_tRNA_Ile	Ile-GAT-1	7	6	6	3	0.999882	0.000205244	0.494798	0.101416	NA
V1	17_tRNA_Ile	Ile-GAT-1	8	7	7	3	0.997648	0.00206845	0.498981	0.100594	NA
V1	17_tRNA_Ile	Ile-GAT-1	9	8	8	3	0.99921	0.00136813	0.510062	0.0983033	NA
V1	17_tRNA_Ile	Ile-GAT-1	10	9	9	3	0.99898	0.00117895	0.523027	0.0994597	NA
V1	17_tRNA_Ile	Ile-GAT-1	11	10	10	3	0.997941	0.00178757	0.532565	0.0972809	NA
V1	17_tRNA_Ile	Ile-GAT-1	12	11	11	3	0.996825	0.000533204	0.537852	0.0950942	NA
V1	17_tRNA_Ile	Ile-GAT-1	13	12	12	3	0.997411	0.000336513	0.542243	0.093111	NA
V1	17_tRNA_Ile	Ile-GAT-1	14	13	13	3	0.998241	0.00158714	0.546714	0.0927898	NA
V1	17_tRNA_Ile	Ile-GAT-1	15	14	14	3	1	0	0.553857	0.0946778	NA
V1	17_tRNA_Ile	Ile-GAT-1	16	15	15	3	0.996035	0.00380424	0.554615	0.0945201	NA
V1	17_tRNA_Ile	Ile-GAT-1	17	16	16	3	0.9963	0.00128055	0.584134	0.0837874	NA
V1	17_tRNA_Ile	Ile-GAT-1	18	17	17	3	0.996413	0.00119618	0.600305	0.0840335	D
V1	17_tRNA_Ile	Ile-GAT-1	19	17A	NA	NA	NA	NA	NA	NA	NA
V1	17_tRNA_Ile	Ile-GAT-1	20	18	18	3	0.998762	0.00112359	0.652902	0.0829901	NA
V1	17_tRNA_Ile	Ile-GAT-1	21	19	19	3	0.998618	0.000731407	0.682399	0.074587	NA
V1	17_tRNA_Ile	Ile-GAT-1	22	20	20	3	0.99829	0.000418003	0.69701	0.0695506	D
V1	17_tRNA_Ile	Ile-GAT-1	23	20A	21	3	0.99868	0.000693771	0.711583	0.068383	D
V1	17_tRNA_Ile	Ile-GAT-1	24	20B	NA	NA	NA	NA	NA	NA	NA
V1	17_tRNA_Ile	Ile-GAT-1	25	21	22	3	0.999706	0.000509914	0.727928	0.0676028	NA
V1	17_tRNA_Ile	Ile-GAT-1	26	22	23	3	0.996499	0.000447925	0.736053	0.0658313	NA
V1	17_tRNA_Ile	Ile-GAT-1	27	23	24	3	0.999733	0.000300492	0.759898	0.0572581	NA
V1	17_tRNA_Ile	Ile-GAT-1	28	24	25	3	0.99818	4.78e-05	0.761001	0.0564924	NA
V1	17_tRNA_Ile	Ile-GAT-1	29	25	26	3	0.997935	0.000289588	0.769176	0.0554903	NA
V1	17_tRNA_Ile	Ile-GAT-1	30	26	27	3	0.997945	0.00130339	0.772105	0.0557308	NA
V1	17_tRNA_Ile	Ile-GAT-1	31	27	28	3	0.997758	0.00113148	0.774972	0.0556935	NA
V1	17_tRNA_Ile	Ile-GAT-1	32	28	29	3	0.998881	0.000590382	0.778301	0.055754	NA
V1	17_tRNA_Ile	Ile-GAT-1	33	29	30	3	0.995718	0.00088995	0.776208	0.0544443	NA
V1	17_tRNA_Ile	Ile-GAT-1	34	30	31	3	0.997355	0.000785691	0.778041	0.0542221	NA
V1	17_tRNA_Ile	Ile-GAT-1	35	31	32	3	0.999601	0.000345307	0.778454	0.054297	NA
V1	17_tRNA_Ile	Ile-GAT-1	36	32	33	3	0.998181	0.000161479	0.733981	0.0406351	NA
V1	17_tRNA_Ile	Ile-GAT-1	37	33	34	3	0.998715	0.00113997	0.698523	0.049806	NA
V1	17_tRNA_Ile	Ile-GAT-1	38	34	35	3	0.994349	0.00273616	0.698187	0.0529208	NA
V1	17_tRNA_Ile	Ile-GAT-1	39	35	36	3	0.99672	0.00259321	0.724984	0.0390734	NA
V1	17_tRNA_Ile	Ile-GAT-1	40	36	37	3	0.993592	0.00289849	0.71584	0.0483129	NA
V1	17_tRNA_Ile	Ile-GAT-1	41	37	38	3	0.996076	0.00341095	0.715835	0.0503975	t6A
V1	17_tRNA_Ile	Ile-GAT-1	42	38	39	3	0.996258	0.000580419	0.716296	0.0567106	NA
V1	17_tRNA_Ile	Ile-GAT-1	43	39	40	3	0.996383	0.000995432	0.713641	0.0577415	NA
V1	17_tRNA_Ile	Ile-GAT-1	44	40	41	3	0.996689	0.00128275	0.723979	0.052551	NA
V1	17_tRNA_Ile	Ile-GAT-1	45	41	42	3	0.997746	0.000776553	0.728541	0.0525068	NA
V1	17_tRNA_Ile	Ile-GAT-1	46	42	43	3	0.999554	0.000392911	0.758921	0.0524326	NA
V1	17_tRNA_Ile	Ile-GAT-1	47	43	44	3	0.997262	0.000981983	0.769117	0.0502651	NA
V1	17_tRNA_Ile	Ile-GAT-1	48	44	45	3	0.999821	0.000309405	0.787827	0.0474488	NA
V1	17_tRNA_Ile	Ile-GAT-1	49	45	46	3	0.961562	0.0154625	0.760532	0.0375795	NA
V1	17_tRNA_Ile	Ile-GAT-1	50	45A	47	3	0.886726	0.0372683	0.78653	0.0375178	m7G
V1	17_tRNA_Ile	Ile-GAT-1	51	45B	48	3	0.593039	0.0559038	0.593653	0.0259065	acp3U
V1	17_tRNA_Ile	Ile-GAT-1	52	45C	49	3	0.997739	0.00112646	0.986151	0.00160023	NA
V1	17_tRNA_Ile	Ile-GAT-1	53	45D	NA	NA	NA	NA	NA	NA	NA
V1	17_tRNA_Ile	Ile-GAT-1	54	45E	NA	NA	NA	NA	NA	NA	NA
V1	17_tRNA_Ile	Ile-GAT-1	55	45F	NA	NA	NA	NA	NA	NA	NA
V1	17_tRNA_Ile	Ile-GAT-1	56	45G	NA	NA	NA	NA	NA	NA	NA
V1	17_tRNA_Ile	Ile-GAT-1	57	45H	NA	NA	NA	NA	NA	NA	NA
V1	17_tRNA_Ile	Ile-GAT-1	58	45I	NA	NA	NA	NA	NA	NA	NA
V1	17_tRNA_Ile	Ile-GAT-1	59	45J	NA	NA	NA	NA	NA	NA	NA
V1	17_tRNA_Ile	Ile-GAT-1	60	45K	NA	NA	NA	NA	NA	NA	NA
V1	17_tRNA_Ile	Ile-GAT-1	61	45L	NA	NA	NA	NA	NA	NA	NA
V1	17_tRNA_Ile	Ile-GAT-1	62	45M	NA	NA	NA	NA	NA	NA	NA
V1	17_tRNA_Ile	Ile-GAT-1	63	45N	NA	NA	NA	NA	NA	NA	NA
V1	17_tRNA_Ile	Ile-GAT-1	64	45O	NA	NA	NA	NA	NA	NA	NA
V1	17_tRNA_Ile	Ile-GAT-1	65	45P	NA	NA	NA	NA	NA	NA	NA
V1	17_tRNA_Ile	Ile-GAT-1	66	45Q	NA	NA	NA	NA	NA	NA	NA
V1	17_tRNA_Ile	Ile-GAT-1	67	45R	NA	NA	NA	NA	NA	NA	NA
V1	17_tRNA_Ile	Ile-GAT-1	68	45S	NA	NA	NA	NA	NA	NA	NA
V1	17_tRNA_Ile	Ile-GAT-1	69	46	NA	NA	NA	NA	NA	NA	NA
V1	17_tRNA_Ile	Ile-GAT-1	70	47	NA	NA	NA	NA	NA	NA	NA
V1	17_tRNA_Ile	Ile-GAT-1	71	48	NA	NA	NA	NA	NA	NA	NA
V1	17_tRNA_Ile	Ile-GAT-1	72	49	50	3	0.996637	0.00219407	0.99468	0.00191196	NA
V1	17_tRNA_Ile	Ile-GAT-1	73	50	51	3	0.998654	0.00130827	0.997265	0.00133883	NA
V1	17_tRNA_Ile	Ile-GAT-1	74	51	52	3	0.999903	0.000167445	0.99876	0.000320932	NA
V1	17_tRNA_Ile	Ile-GAT-1	75	52	53	3	0.998381	0.00114903	0.999649	0.000308797	NA
V1	17_tRNA_Ile	Ile-GAT-1	76	53	54	3	0.997284	0.00163958	0.999428	0.000754011	NA
V1	17_tRNA_Ile	Ile-GAT-1	77	54	55	3	0.999345	0.000567766	0.999952	8.36e-05	m5U
V1	17_tRNA_Ile	Ile-GAT-1	78	55	56	3	0.999758	0.00041837	0.999903	0.000167299	Y
V1	17_tRNA_Ile	Ile-GAT-1	79	56	57	3	0.994766	0.0029	0.998905	0.00057188	NA
V1	17_tRNA_Ile	Ile-GAT-1	80	57	58	3	0.999952	8.37e-05	0.999015	0.000424634	NA
V1	17_tRNA_Ile	Ile-GAT-1	81	58	59	3	0.999524	0.00082361	0.999367	0.00109606	NA
V1	17_tRNA_Ile	Ile-GAT-1	82	59	60	3	0.99944	0.000498092	0.996743	0.00133322	NA
V1	17_tRNA_Ile	Ile-GAT-1	83	60	61	3	1	0	0.205157	0.0472308	NA
V1	17_tRNA_Ile	Ile-GAT-1	84	61	62	3	0.999732	0.000464481	0.205109	0.0472691	NA
V1	17_tRNA_Ile	Ile-GAT-1	85	62	63	3	0.986767	0.0069436	0.204951	0.0474178	NA
V1	17_tRNA_Ile	Ile-GAT-1	86	63	64	3	0.977775	0.00456894	0.207294	0.0478977	NA
V1	17_tRNA_Ile	Ile-GAT-1	87	64	65	3	0.974648	0.00822597	0.207611	0.0488722	NA
V1	17_tRNA_Ile	Ile-GAT-1	88	65	66	3	0.961372	0.00878423	0.205523	0.0481644	Y
V1	17_tRNA_Ile	Ile-GAT-1	89	66	67	3	0.873604	0.0421969	0.205186	0.0497009	NA
V1	17_tRNA_Ile	Ile-GAT-1	90	67	68	3	0.99686	0.00281408	0.205483	0.0482925	NA
V1	17_tRNA_Ile	Ile-GAT-1	91	68	69	3	0.605982	0.038427	0.204745	0.0488817	NA
V1	17_tRNA_Ile	Ile-GAT-1	92	69	70	3	0.654994	0.0128722	0.191871	0.0450907	NA
V1	17_tRNA_Ile	Ile-GAT-1	93	70	71	3	0.981501	0.0023929	0.19538	0.0457805	NA
V1	17_tRNA_Ile	Ile-GAT-1	94	71	72	3	0.997732	0.00392755	0.195042	0.0460602	NA
V1	17_tRNA_Ile	Ile-GAT-1	95	72	73	3	0.996506	0.00310076	0.183864	0.0421508	NA
V1	17_tRNA_Ile	Ile-GAT-1	96	73	74	3	0.999687	0.000541604	0.179295	0.0399619	NA
V1	17_tRNA_Ile	Ile-GAT-1	97	74	75	3	1	0	0.173644	0.0424614	NA
V1	17_tRNA_Ile	Ile-GAT-1	98	75	76	3	1	0	0.137162	0.0283031	NA
V1	17_tRNA_Ile	Ile-GAT-1	99	76	77	3	1	0	0.125084	0.0252099	NA
V1	18_tRNA_Ile	Ile2-CAT-1	1	0	NA	NA	NA	NA	NA	NA	NA
V1	18_tRNA_Ile	Ile2-CAT-1	2	1	1	NA	NA	NA	NA	NA	NA
V1	18_tRNA_Ile	Ile2-CAT-1	3	2	2	NA	NA	NA	NA	NA	NA
V1	18_tRNA_Ile	Ile2-CAT-1	4	3	3	NA	NA	NA	NA	NA	NA
V1	18_tRNA_Ile	Ile2-CAT-1	5	4	4	NA	NA	NA	NA	NA	NA
V1	18_tRNA_Ile	Ile2-CAT-1	6	5	5	NA	NA	NA	NA	NA	NA
V1	18_tRNA_Ile	Ile2-CAT-1	7	6	6	NA	NA	NA	NA	NA	NA
V1	18_tRNA_Ile	Ile2-CAT-1	8	7	7	NA	NA	NA	NA	NA	NA
V1	18_tRNA_Ile	Ile2-CAT-1	9	8	8	NA	NA	NA	NA	NA	s4U
V1	18_tRNA_Ile	Ile2-CAT-1	10	9	9	NA	NA	NA	NA	NA	NA
V1	18_tRNA_Ile	Ile2-CAT-1	11	10	10	NA	NA	NA	NA	NA	NA
V1	18_tRNA_Ile	Ile2-CAT-1	12	11	11	NA	NA	NA	NA	NA	NA
V1	18_tRNA_Ile	Ile2-CAT-1	13	12	12	NA	NA	NA	NA	NA	NA
V1	18_tRNA_Ile	Ile2-CAT-1	14	13	13	NA	NA	NA	NA	NA	NA
V1	18_tRNA_Ile	Ile2-CAT-1	15	14	14	NA	NA	NA	NA	NA	NA
V1	18_tRNA_Ile	Ile2-CAT-1	16	15	15	NA	NA	NA	NA	NA	NA
V1	18_tRNA_Ile	Ile2-CAT-1	17	16	16	NA	NA	NA	NA	NA	NA
V1	18_tRNA_Ile	Ile2-CAT-1	18	17	NA	NA	NA	NA	NA	NA	NA
V1	18_tRNA_Ile	Ile2-CAT-1	19	17A	NA	NA	NA	NA	NA	NA	NA
V1	18_tRNA_Ile	Ile2-CAT-1	20	18	17	NA	NA	NA	NA	NA	Gm
V1	18_tRNA_Ile	Ile2-CAT-1	21	19	18	NA	NA	NA	NA	NA	NA
V1	18_tRNA_Ile	Ile2-CAT-1	22	20	19	NA	NA	NA	NA	NA	D
V1	18_tRNA_Ile	Ile2-CAT-1	23	20A	20	NA	NA	NA	NA	NA	D
V1	18_tRNA_Ile	Ile2-CAT-1	24	20B	NA	NA	NA	NA	NA	NA	NA
V1	18_tRNA_Ile	Ile2-CAT-1	25	21	21	NA	NA	NA	NA	NA	NA
V1	18_tRNA_Ile	Ile2-CAT-1	26	22	22	NA	NA	NA	NA	NA	NA
V1	18_tRNA_Ile	Ile2-CAT-1	27	23	23	NA	NA	NA	NA	NA	NA
V1	18_tRNA_Ile	Ile2-CAT-1	28	24	24	NA	NA	NA	NA	NA	NA
V1	18_tRNA_Ile	Ile2-CAT-1	29	25	25	NA	NA	NA	NA	NA	NA
V1	18_tRNA_Ile	Ile2-CAT-1	30	26	26	NA	NA	NA	NA	NA	NA
V1	18_tRNA_Ile	Ile2-CAT-1	31	27	27	NA	NA	NA	NA	NA	NA
V1	18_tRNA_Ile	Ile2-CAT-1	32	28	28	NA	NA	NA	NA	NA	NA
V1	18_tRNA_Ile	Ile2-CAT-1	33	29	29	NA	NA	NA	NA	NA	NA
V1	18_tRNA_Ile	Ile2-CAT-1	34	30	30	NA	NA	NA	NA	NA	NA
V1	18_tRNA_Ile	Ile2-CAT-1	35	31	31	NA	NA	NA	NA	NA	NA
V1	18_tRNA_Ile	Ile2-CAT-1	36	32	32	NA	NA	NA	NA	NA	NA
V1	18_tRNA_Ile	Ile2-CAT-1	37	33	33	NA	NA	NA	NA	NA	NA
V1	18_tRNA_Ile	Ile2-CAT-1	38	34	34	NA	NA	NA	NA	NA	k2C
V1	18_tRNA_Ile	Ile2-CAT-1	39	35	35	NA	NA	NA	NA	NA	NA
V1	18_tRNA_Ile	Ile2-CAT-1	40	36	36	NA	NA	NA	NA	NA	NA
V1	18_tRNA_Ile	Ile2-CAT-1	41	37	37	1	1	NA	0.0286748	NA	t6A
V1	18_tRNA_Ile	Ile2-CAT-1	42	38	38	1	1	NA	0.0289532	NA	NA
V1	18_tRNA_Ile	Ile2-CAT-1	43	39	39	1	0.963636	NA	0.0297884	NA	Y
V1	18_tRNA_Ile	Ile2-CAT-1	44	40	40	1	0.992126	NA	0.0353563	NA	NA
V1	18_tRNA_Ile	Ile2-CAT-1	45	41	41	1	0.992308	NA	0.0361915	NA	NA
V1	18_tRNA_Ile	Ile2-CAT-1	46	42	42	1	1	NA	0.0364699	NA	NA
V1	18_tRNA_Ile	Ile2-CAT-1	47	43	43	1	0.992593	NA	0.0375835	NA	NA
V1	18_tRNA_Ile	Ile2-CAT-1	48	44	44	1	0.992857	NA	0.0389755	NA	NA
V1	18_tRNA_Ile	Ile2-CAT-1	49	45	45	1	0.802817	NA	0.032294	NA	NA
V1	18_tRNA_Ile	Ile2-CAT-1	50	45A	46	1	0.981928	NA	0.0462138	NA	m7G
V1	18_tRNA_Ile	Ile2-CAT-1	51	45B	47	1	0.566327	NA	0.0476058	NA	acp3U
V1	18_tRNA_Ile	Ile2-CAT-1	52	45C	48	3	1	0	0.812182	0.0161748	NA
V1	18_tRNA_Ile	Ile2-CAT-1	53	45D	NA	NA	NA	NA	NA	NA	NA
V1	18_tRNA_Ile	Ile2-CAT-1	54	45E	NA	NA	NA	NA	NA	NA	NA
V1	18_tRNA_Ile	Ile2-CAT-1	55	45F	NA	NA	NA	NA	NA	NA	NA
V1	18_tRNA_Ile	Ile2-CAT-1	56	45G	NA	NA	NA	NA	NA	NA	NA
V1	18_tRNA_Ile	Ile2-CAT-1	57	45H	NA	NA	NA	NA	NA	NA	NA
V1	18_tRNA_Ile	Ile2-CAT-1	58	45I	NA	NA	NA	NA	NA	NA	NA
V1	18_tRNA_Ile	Ile2-CAT-1	59	45J	NA	NA	NA	NA	NA	NA	NA
V1	18_tRNA_Ile	Ile2-CAT-1	60	45K	NA	NA	NA	NA	NA	NA	NA
V1	18_tRNA_Ile	Ile2-CAT-1	61	45L	NA	NA	NA	NA	NA	NA	NA
V1	18_tRNA_Ile	Ile2-CAT-1	62	45M	NA	NA	NA	NA	NA	NA	NA
V1	18_tRNA_Ile	Ile2-CAT-1	63	45N	NA	NA	NA	NA	NA	NA	NA
V1	18_tRNA_Ile	Ile2-CAT-1	64	45O	NA	NA	NA	NA	NA	NA	NA
V1	18_tRNA_Ile	Ile2-CAT-1	65	45P	NA	NA	NA	NA	NA	NA	NA
V1	18_tRNA_Ile	Ile2-CAT-1	66	45Q	NA	NA	NA	NA	NA	NA	NA
V1	18_tRNA_Ile	Ile2-CAT-1	67	45R	NA	NA	NA	NA	NA	NA	NA
V1	18_tRNA_Ile	Ile2-CAT-1	68	45S	NA	NA	NA	NA	NA	NA	NA
V1	18_tRNA_Ile	Ile2-CAT-1	69	46	NA	NA	NA	NA	NA	NA	NA
V1	18_tRNA_Ile	Ile2-CAT-1	70	47	NA	NA	NA	NA	NA	NA	NA
V1	18_tRNA_Ile	Ile2-CAT-1	71	48	NA	NA	NA	NA	NA	NA	NA
V1	18_tRNA_Ile	Ile2-CAT-1	72	49	49	3	0.999446	0.00096001	0.840763	0.00314164	NA
V1	18_tRNA_Ile	Ile2-CAT-1	73	50	50	3	0.994571	0.0014533	0.889609	0.00689304	NA
V1	18_tRNA_Ile	Ile2-CAT-1	74	51	51	3	0.998472	0.00133262	0.911726	0.00548633	NA
V1	18_tRNA_Ile	Ile2-CAT-1	75	52	52	3	0.997086	0.00148696	0.923979	0.00564783	NA
V1	18_tRNA_Ile	Ile2-CAT-1	76	53	53	3	0.998603	0.000339106	0.929644	0.00549207	NA
V1	18_tRNA_Ile	Ile2-CAT-1	77	54	54	3	0.99712	0.000618803	0.934678	0.00893136	m5U
V1	18_tRNA_Ile	Ile2-CAT-1	78	55	55	3	0.999303	0.00120712	0.935517	0.00926795	Y
V1	18_tRNA_Ile	Ile2-CAT-1	79	56	56	3	0.993771	0.00109403	0.938667	0.00835735	NA
V1	18_tRNA_Ile	Ile2-CAT-1	80	57	57	3	0.997398	0.00221545	0.954482	0.0116335	NA
V1	18_tRNA_Ile	Ile2-CAT-1	81	58	58	3	0.999515	0.000606668	0.964052	0.00609356	NA
V1	18_tRNA_Ile	Ile2-CAT-1	82	59	59	3	0.993863	0.00349237	0.978158	0.00827868	NA
V1	18_tRNA_Ile	Ile2-CAT-1	83	60	60	3	0.998316	0.000560071	0.991633	0.00312714	NA
V1	18_tRNA_Ile	Ile2-CAT-1	84	61	61	3	0.999439	0.000563071	0.998601	0.00122043	NA
V1	18_tRNA_Ile	Ile2-CAT-1	85	62	62	3	0.999536	0.000804333	0.999722	0.000482197	NA
V1	18_tRNA_Ile	Ile2-CAT-1	86	63	63	3	0.999447	0.000957463	1	0	NA
V1	18_tRNA_Ile	Ile2-CAT-1	87	64	64	3	0.997114	0.0014558	1	0	NA
V1	18_tRNA_Ile	Ile2-CAT-1	88	65	65	3	0.999443	0.000964394	0.999814	0.000321465	NA
V1	18_tRNA_Ile	Ile2-CAT-1	89	66	66	3	0.999629	0.000642929	0.999907	0.000160732	NA
V1	18_tRNA_Ile	Ile2-CAT-1	90	67	67	3	0.999722	0.000482197	1	0	NA
V1	18_tRNA_Ile	Ile2-CAT-1	91	68	68	3	0.993024	0.00330582	0.999907	0.000160732	NA
V1	18_tRNA_Ile	Ile2-CAT-1	92	69	69	3	0.997217	0.000534783	0.999814	0.000321465	NA
V1	18_tRNA_Ile	Ile2-CAT-1	93	70	70	3	0.997768	0.00147439	0.997692	0.00250694	NA
V1	18_tRNA_Ile	Ile2-CAT-1	94	71	71	3	0.99432	0.0017745	0.997228	0.00253586	NA
V1	18_tRNA_Ile	Ile2-CAT-1	95	72	72	3	0.999235	0.000870595	0.967533	0.0116272	NA
V1	18_tRNA_Ile	Ile2-CAT-1	96	73	73	3	0.999008	0.00091018	0.929767	0.0151192	NA
V1	18_tRNA_Ile	Ile2-CAT-1	97	74	74	3	1	0	0.831076	0.0463158	NA
V1	18_tRNA_Ile	Ile2-CAT-1	98	75	75	3	1	0	0.41479	0.047569	NA
V1	18_tRNA_Ile	Ile2-CAT-1	99	76	76	3	1	0	0.35704	0.0508714	NA
V1	25_tRNA_Leu	Leu-CAA-1	1	0	NA	NA	NA	NA	NA	NA	NA
V1	25_tRNA_Leu	Leu-CAA-1	2	1	1	NA	NA	NA	NA	NA	NA
V1	25_tRNA_Leu	Leu-CAA-1	3	2	2	NA	NA	NA	NA	NA	NA
V1	25_tRNA_Leu	Leu-CAA-1	4	3	3	NA	NA	NA	NA	NA	NA
V1	25_tRNA_Leu	Leu-CAA-1	5	4	4	NA	NA	NA	NA	NA	NA
V1	25_tRNA_Leu	Leu-CAA-1	6	5	5	NA	NA	NA	NA	NA	NA
V1	25_tRNA_Leu	Leu-CAA-1	7	6	6	NA	NA	NA	NA	NA	NA
V1	25_tRNA_Leu	Leu-CAA-1	8	7	7	NA	NA	NA	NA	NA	NA
V1	25_tRNA_Leu	Leu-CAA-1	9	8	8	NA	NA	NA	NA	NA	s4U
V1	25_tRNA_Leu	Leu-CAA-1	10	9	9	NA	NA	NA	NA	NA	NA
V1	25_tRNA_Leu	Leu-CAA-1	11	10	10	NA	NA	NA	NA	NA	NA
V1	25_tRNA_Leu	Leu-CAA-1	12	11	11	NA	NA	NA	NA	NA	NA
V1	25_tRNA_Leu	Leu-CAA-1	13	12	12	NA	NA	NA	NA	NA	NA
V1	25_tRNA_Leu	Leu-CAA-1	14	13	13	1	0.990099	NA	0.00363728	NA	NA
V1	25_tRNA_Leu	Leu-CAA-1	15	14	14	1	1	NA	0.00363728	NA	NA
V1	25_tRNA_Leu	Leu-CAA-1	16	15	15	1	1	NA	0.00363728	NA	NA
V1	25_tRNA_Leu	Leu-CAA-1	17	16	16	1	1	NA	0.00385336	NA	D
V1	25_tRNA_Leu	Leu-CAA-1	18	17	17	1	0.981651	NA	0.00392538	NA	NA
V1	25_tRNA_Leu	Leu-CAA-1	19	17A	NA	NA	NA	NA	NA	NA	NA
V1	25_tRNA_Leu	Leu-CAA-1	20	18	18	1	1	NA	0.00410545	NA	Gm
V1	25_tRNA_Leu	Leu-CAA-1	21	19	19	1	1	NA	0.00421348	NA	NA
V1	25_tRNA_Leu	Leu-CAA-1	22	20	20	1	1	NA	0.00439355	NA	D
V1	25_tRNA_Leu	Leu-CAA-1	23	20A	21	1	1	NA	0.00442956	NA	NA
V1	25_tRNA_Leu	Leu-CAA-1	24	20B	NA	NA	NA	NA	NA	NA	NA
V1	25_tRNA_Leu	Leu-CAA-1	25	21	22	1	0.984733	NA	0.00471766	NA	NA
V1	25_tRNA_Leu	Leu-CAA-1	26	22	23	1	1	NA	0.00554595	NA	NA
V1	25_tRNA_Leu	Leu-CAA-1	27	23	24	1	1	NA	0.00558197	NA	NA
V1	25_tRNA_Leu	Leu-CAA-1	28	24	25	1	0.986928	NA	0.00550994	NA	NA
V1	25_tRNA_Leu	Leu-CAA-1	29	25	26	1	1	NA	0.00608614	NA	NA
V1	25_tRNA_Leu	Leu-CAA-1	30	26	27	1	0.994152	NA	0.00615817	NA	NA
V1	25_tRNA_Leu	Leu-CAA-1	31	27	28	1	1	NA	0.00612215	NA	NA
V1	25_tRNA_Leu	Leu-CAA-1	32	28	29	1	1	NA	0.00659032	NA	NA
V1	25_tRNA_Leu	Leu-CAA-1	33	29	30	1	1	NA	0.00669836	NA	NA
V1	25_tRNA_Leu	Leu-CAA-1	34	30	31	1	1	NA	0.00673437	NA	NA
V1	25_tRNA_Leu	Leu-CAA-1	35	31	32	1	1	NA	0.00749064	NA	NA
V1	25_tRNA_Leu	Leu-CAA-1	36	32	33	1	0.994792	NA	0.00687842	NA	Y
V1	25_tRNA_Leu	Leu-CAA-1	37	33	34	1	0.988571	NA	0.00626621	NA	NA
V1	25_tRNA_Leu	Leu-CAA-1	38	34	35	1	0.994152	NA	0.00612215	NA	Cm
V1	25_tRNA_Leu	Leu-CAA-1	39	35	36	1	0.880952	NA	0.00666235	NA	NA
V1	25_tRNA_Leu	Leu-CAA-1	40	36	37	1	0.948276	NA	0.0079588	NA	NA
V1	25_tRNA_Leu	Leu-CAA-1	41	37	38	3	0.987928	0.00473916	0.0431879	0.0153974	ms2i6A
V1	25_tRNA_Leu	Leu-CAA-1	42	38	39	3	0.999625	0.000375235	0.7205	0.0740158	NA
V1	25_tRNA_Leu	Leu-CAA-1	43	39	40	3	0.999717	0.00025654	0.77324	0.0740756	Y
V1	25_tRNA_Leu	Leu-CAA-1	44	40	41	3	0.997414	0.00196533	0.785029	0.0738321	NA
V1	25_tRNA_Leu	Leu-CAA-1	45	41	42	3	0.999553	0.00038615	0.790058	0.0705738	NA
V1	25_tRNA_Leu	Leu-CAA-1	46	42	43	3	0.999454	0.000446268	0.795478	0.0708978	NA
V1	25_tRNA_Leu	Leu-CAA-1	47	43	44	3	0.998493	0.000981751	0.797076	0.070638	NA
V1	25_tRNA_Leu	Leu-CAA-1	48	44	45	3	0.991219	0.00438008	0.801379	0.0705972	NA
V1	25_tRNA_Leu	Leu-CAA-1	49	45	46	3	0.997192	0.00161947	0.808988	0.0683616	NA
V1	25_tRNA_Leu	Leu-CAA-1	50	45A	47	3	0.99915	0.0007368	0.816436	0.0651668	NA
V1	25_tRNA_Leu	Leu-CAA-1	51	45B	48	3	0.998709	0.00100274	0.823285	0.0638157	NA
V1	25_tRNA_Leu	Leu-CAA-1	52	45C	49	3	0.996273	0.00210744	0.826471	0.0632564	NA
V1	25_tRNA_Leu	Leu-CAA-1	53	45D	50	3	0.998634	0.000642369	0.870992	0.0296031	NA
V1	25_tRNA_Leu	Leu-CAA-1	54	45E	51	3	0.99916	0.000511118	0.874048	0.0289886	NA
V1	25_tRNA_Leu	Leu-CAA-1	55	45F	52	3	0.999602	0.00034553	0.879778	0.0289499	NA
V1	25_tRNA_Leu	Leu-CAA-1	56	45G	53	3	0.998031	0.00169247	0.885439	0.0286179	NA
V1	25_tRNA_Leu	Leu-CAA-1	57	45H	54	3	0.999016	0.000822048	0.896899	0.0233943	NA
V1	25_tRNA_Leu	Leu-CAA-1	58	45I	55	3	0.998603	0.00128554	0.901964	0.021197	NA
V1	25_tRNA_Leu	Leu-CAA-1	59	45J	56	3	0.996964	0.00162347	0.910324	0.0208013	NA
V1	25_tRNA_Leu	Leu-CAA-1	60	45K	57	3	0.999103	0.000669807	0.927855	0.0136655	NA
V1	25_tRNA_Leu	Leu-CAA-1	61	45L	NA	NA	NA	NA	NA	NA	NA
V1	25_tRNA_Leu	Leu-CAA-1	62	45M	NA	NA	NA	NA	NA	NA	NA
V1	25_tRNA_Leu	Leu-CAA-1	63	45N	NA	NA	NA	NA	NA	NA	NA
V1	25_tRNA_Leu	Leu-CAA-1	64	45O	NA	NA	NA	NA	NA	NA	NA
V1	25_tRNA_Leu	Leu-CAA-1	65	45P	NA	NA	NA	NA	NA	NA	NA
V1	25_tRNA_Leu	Leu-CAA-1	66	45Q	NA	NA	NA	NA	NA	NA	NA
V1	25_tRNA_Leu	Leu-CAA-1	67	45R	NA	NA	NA	NA	NA	NA	NA
V1	25_tRNA_Leu	Leu-CAA-1	68	45S	NA	NA	NA	NA	NA	NA	NA
V1	25_tRNA_Leu	Leu-CAA-1	69	46	NA	NA	NA	NA	NA	NA	NA
V1	25_tRNA_Leu	Leu-CAA-1	70	47	NA	NA	NA	NA	NA	NA	NA
V1	25_tRNA_Leu	Leu-CAA-1	71	48	NA	NA	NA	NA	NA	NA	NA
V1	25_tRNA_Leu	Leu-CAA-1	72	49	58	3	0.996554	0.00257066	0.935302	0.0128599	NA
V1	25_tRNA_Leu	Leu-CAA-1	73	50	59	3	0.998002	0.00171885	0.948667	0.0124809	NA
V1	25_tRNA_Leu	Leu-CAA-1	74	51	60	3	0.999025	0.0008388	0.952337	0.0120455	NA
V1	25_tRNA_Leu	Leu-CAA-1	75	52	61	3	0.998237	0.00112286	0.954353	0.0120478	NA
V1	25_tRNA_Leu	Leu-CAA-1	76	53	62	3	0.998564	0.00109619	0.956357	0.0120308	NA
V1	25_tRNA_Leu	Leu-CAA-1	77	54	63	3	0.999499	0.000541963	0.957676	0.0117167	m5U
V1	25_tRNA_Leu	Leu-CAA-1	78	55	64	3	0.999541	0.000358037	0.958729	0.0120232	Y
V1	25_tRNA_Leu	Leu-CAA-1	79	56	65	3	0.993979	0.00451132	0.959547	0.0118941	NA
V1	25_tRNA_Leu	Leu-CAA-1	80	57	66	3	0.998288	0.001072	0.964565	0.0110712	NA
V1	25_tRNA_Leu	Leu-CAA-1	81	58	67	3	0.999586	0.000378875	0.979211	0.00387042	NA
V1	25_tRNA_Leu	Leu-CAA-1	82	59	68	3	0.998352	0.00133559	0.989342	0.00258149	NA
V1	25_tRNA_Leu	Leu-CAA-1	83	60	69	3	0.998938	0.00084701	0.996029	0.000718541	NA
V1	25_tRNA_Leu	Leu-CAA-1	84	61	70	3	0.998073	0.00125738	0.99932	0.000141113	NA
V1	25_tRNA_Leu	Leu-CAA-1	85	62	71	3	0.998938	0.000599213	1	0	NA
V1	25_tRNA_Leu	Leu-CAA-1	86	63	72	3	0.998521	0.000849376	0.997058	0.000879323	NA
V1	25_tRNA_Leu	Leu-CAA-1	87	64	73	3	0.99729	0.00148529	0.996822	0.000868933	NA
V1	25_tRNA_Leu	Leu-CAA-1	88	65	74	3	0.998766	0.000654473	0.996472	0.000760933	NA
V1	25_tRNA_Leu	Leu-CAA-1	89	66	75	3	0.99951	0.000484814	0.996296	0.000710786	NA
V1	25_tRNA_Leu	Leu-CAA-1	90	67	76	3	0.999878	0.000121204	0.996203	0.000780722	NA
V1	25_tRNA_Leu	Leu-CAA-1	91	68	77	3	0.99975	0.000331144	0.996144	0.000830072	NA
V1	25_tRNA_Leu	Leu-CAA-1	92	69	78	3	0.996751	0.00151867	0.995597	0.000674199	NA
V1	25_tRNA_Leu	Leu-CAA-1	93	70	79	3	0.999588	0.000258815	0.994532	0.000759887	NA
V1	25_tRNA_Leu	Leu-CAA-1	94	71	80	3	0.998435	0.000927508	0.993201	0.000667004	NA
V1	25_tRNA_Leu	Leu-CAA-1	95	72	81	3	0.999453	0.000478952	0.972182	0.00551878	NA
V1	25_tRNA_Leu	Leu-CAA-1	96	73	82	3	0.999566	0.000423098	0.94298	0.00788683	NA
V1	25_tRNA_Leu	Leu-CAA-1	97	74	83	3	1	0	0.897856	0.0161893	NA
V1	25_tRNA_Leu	Leu-CAA-1	98	75	84	3	1	0	0.64653	0.056111	NA
V1	25_tRNA_Leu	Leu-CAA-1	99	76	85	3	1	0	0.571567	0.058027	NA
V1	21_tRNA_Leu	Leu-CAG-1	1	0	NA	NA	NA	NA	NA	NA	NA
V1	21_tRNA_Leu	Leu-CAG-1	2	1	1	3	1	0	0.0574676	0.0240025	NA
V1	21_tRNA_Leu	Leu-CAG-1	3	2	2	3	1	0	0.0590218	0.0250021	NA
V1	21_tRNA_Leu	Leu-CAG-1	4	3	3	3	0.997681	0.000166239	0.05944	0.0250998	NA
V1	21_tRNA_Leu	Leu-CAG-1	5	4	4	3	0.997197	0.00176649	0.059556	0.0251373	NA
V1	21_tRNA_Leu	Leu-CAG-1	6	5	5	3	0.997639	0.00214031	0.0597729	0.0252254	NA
V1	21_tRNA_Leu	Leu-CAG-1	7	6	6	3	0.99622	0.00190521	0.0599572	0.0252037	NA
V1	21_tRNA_Leu	Leu-CAG-1	8	7	7	3	0.999078	0.0015971	0.0605196	0.0253152	NA
V1	21_tRNA_Leu	Leu-CAG-1	9	8	8	3	0.99831	0.00147305	0.0614652	0.0256956	NA
V1	21_tRNA_Leu	Leu-CAG-1	10	9	9	3	0.996664	0.00291175	0.0617416	0.0257784	NA
V1	21_tRNA_Leu	Leu-CAG-1	11	10	10	3	0.998568	0.00248036	0.062414	0.0255647	NA
V1	21_tRNA_Leu	Leu-CAG-1	12	11	11	3	0.998528	0.00165654	0.0628764	0.0255331	NA
V1	21_tRNA_Leu	Leu-CAG-1	13	12	12	3	0.996336	0.00314754	0.0632332	0.0255523	NA
V1	21_tRNA_Leu	Leu-CAG-1	14	13	13	3	0.99474	0.00324416	0.0641671	0.0253405	NA
V1	21_tRNA_Leu	Leu-CAG-1	15	14	14	3	0.99842	0.00137323	0.064991	0.0252255	NA
V1	21_tRNA_Leu	Leu-CAG-1	16	15	15	3	0.999505	0.000466005	0.0654488	0.0253369	NA
V1	21_tRNA_Leu	Leu-CAG-1	17	16	16	3	0.998447	0.000311366	0.0755317	0.0265441	D
V1	21_tRNA_Leu	Leu-CAG-1	18	17	17	3	0.998997	0.000704002	0.0787274	0.02651	D
V1	21_tRNA_Leu	Leu-CAG-1	19	17A	NA	NA	NA	NA	NA	NA	NA
V1	21_tRNA_Leu	Leu-CAG-1	20	18	18	3	0.999219	0.000710949	0.080588	0.0268865	Gm
V1	21_tRNA_Leu	Leu-CAG-1	21	19	19	3	0.997161	0.000598819	0.0823977	0.0268646	NA
V1	21_tRNA_Leu	Leu-CAG-1	22	20	20	3	0.998925	0.000537917	0.0854467	0.0268785	D
V1	21_tRNA_Leu	Leu-CAG-1	23	20A	21	3	0.999443	0.000483855	0.0899414	0.0276779	NA
V1	21_tRNA_Leu	Leu-CAG-1	24	20B	NA	NA	NA	NA	NA	NA	NA
V1	21_tRNA_Leu	Leu-CAG-1	25	21	22	3	0.988033	0.00137943	0.0956301	0.0272848	NA
V1	21_tRNA_Leu	Leu-CAG-1	26	22	23	3	0.999106	0.000834706	0.0988427	0.0270605	NA
V1	21_tRNA_Leu	Leu-CAG-1	27	23	24	3	0.997824	0.000810867	0.0999339	0.0270093	NA
V1	21_tRNA_Leu	Leu-CAG-1	28	24	25	3	0.998169	0.00193706	0.100486	0.0271746	NA
V1	21_tRNA_Leu	Leu-CAG-1	29	25	26	3	0.998948	0.000560847	0.101131	0.0272788	NA
V1	21_tRNA_Leu	Leu-CAG-1	30	26	27	3	0.998105	0.000660663	0.101423	0.027216	NA
V1	21_tRNA_Leu	Leu-CAG-1	31	27	28	3	0.999592	0.000409983	0.102013	0.0271661	NA
V1	21_tRNA_Leu	Leu-CAG-1	32	28	29	3	0.999346	0.00113206	0.102311	0.027135	NA
V1	21_tRNA_Leu	Leu-CAG-1	33	29	30	3	0.999326	0.000616587	0.102655	0.0270191	NA
V1	21_tRNA_Leu	Leu-CAG-1	34	30	31	3	0.99784	0.00149419	0.103021	0.0270834	NA
V1	21_tRNA_Leu	Leu-CAG-1	35	31	32	3	0.999467	0.000461674	0.103967	0.0266109	NA
V1	21_tRNA_Leu	Leu-CAG-1	36	32	33	3	0.996371	0.00248936	0.103967	0.0267063	NA
V1	21_tRNA_Leu	Leu-CAG-1	37	33	34	3	0.997069	0.000237733	0.104169	0.0269127	NA
V1	21_tRNA_Leu	Leu-CAG-1	38	34	35	3	0.991338	0.000782633	0.104934	0.0266993	NA
V1	21_tRNA_Leu	Leu-CAG-1	39	35	36	3	0.998716	0.00116613	0.108011	0.0253089	NA
V1	21_tRNA_Leu	Leu-CAG-1	40	36	37	3	0.969014	0.00850388	0.105926	0.0235025	NA
V1	21_tRNA_Leu	Leu-CAG-1	41	37	38	3	0.933997	0.0258413	0.113545	0.0232517	m1G
V1	21_tRNA_Leu	Leu-CAG-1	42	38	39	3	0.991581	0.00926982	0.79673	0.0498754	Y
V1	21_tRNA_Leu	Leu-CAG-1	43	39	40	3	0.998955	0.000828752	0.858806	0.0339863	NA
V1	21_tRNA_Leu	Leu-CAG-1	44	40	41	3	0.99904	0.000506737	0.875281	0.0271666	Y
V1	21_tRNA_Leu	Leu-CAG-1	45	41	42	3	0.998748	0.000876066	0.876621	0.026622	NA
V1	21_tRNA_Leu	Leu-CAG-1	46	42	43	3	0.999167	0.000563556	0.879394	0.0262325	NA
V1	21_tRNA_Leu	Leu-CAG-1	47	43	44	3	0.998167	0.00109186	0.881819	0.025601	NA
V1	21_tRNA_Leu	Leu-CAG-1	48	44	45	3	0.998209	0.00118791	0.896574	0.0224563	NA
V1	21_tRNA_Leu	Leu-CAG-1	49	45	46	3	0.997293	0.00106267	0.9011	0.0218846	NA
V1	21_tRNA_Leu	Leu-CAG-1	50	45A	47	3	0.998668	0.0009703	0.906124	0.0211203	NA
V1	21_tRNA_Leu	Leu-CAG-1	51	45B	48	3	1	0	0.910004	0.0207838	NA
V1	21_tRNA_Leu	Leu-CAG-1	52	45C	49	3	0.999417	0.000519997	0.910951	0.0203759	NA
V1	21_tRNA_Leu	Leu-CAG-1	53	45D	50	3	0.997127	0.0016528	0.91676	0.0166519	NA
V1	21_tRNA_Leu	Leu-CAG-1	54	45E	51	3	0.999167	0.000563331	0.922347	0.015771	NA
V1	21_tRNA_Leu	Leu-CAG-1	55	45F	52	3	0.999708	0.000260106	0.925349	0.0157753	NA
V1	21_tRNA_Leu	Leu-CAG-1	56	45G	53	3	0.998542	0.000879293	0.927741	0.0153017	NA
V1	21_tRNA_Leu	Leu-CAG-1	57	45H	54	3	0.997086	0.0014486	0.932126	0.0147669	NA
V1	21_tRNA_Leu	Leu-CAG-1	58	45I	55	3	0.998085	0.00120136	0.937809	0.0134095	NA
V1	21_tRNA_Leu	Leu-CAG-1	59	45J	56	3	0.999459	0.000260051	0.94135	0.0128553	NA
V1	21_tRNA_Leu	Leu-CAG-1	60	45K	57	3	0.998169	0.000832227	0.942438	0.0127286	NA
V1	21_tRNA_Leu	Leu-CAG-1	61	45L	58	3	0.99846	0.00122573	0.945396	0.0121964	NA
V1	21_tRNA_Leu	Leu-CAG-1	62	45M	59	3	0.999417	0.000401356	0.95399	0.0111613	NA
V1	21_tRNA_Leu	Leu-CAG-1	63	45N	NA	NA	NA	NA	NA	NA	NA
V1	21_tRNA_Leu	Leu-CAG-1	64	45O	NA	NA	NA	NA	NA	NA	NA
V1	21_tRNA_Leu	Leu-CAG-1	65	45P	NA	NA	NA	NA	NA	NA	NA
V1	21_tRNA_Leu	Leu-CAG-1	66	45Q	NA	NA	NA	NA	NA	NA	NA
V1	21_tRNA_Leu	Leu-CAG-1	67	45R	NA	NA	NA	NA	NA	NA	NA
V1	21_tRNA_Leu	Leu-CAG-1	68	45S	NA	NA	NA	NA	NA	NA	NA
V1	21_tRNA_Leu	Leu-CAG-1	69	46	NA	NA	NA	NA	NA	NA	NA
V1	21_tRNA_Leu	Leu-CAG-1	70	47	NA	NA	NA	NA	NA	NA	NA
V1	21_tRNA_Leu	Leu-CAG-1	71	48	NA	NA	NA	NA	NA	NA	NA
V1	21_tRNA_Leu	Leu-CAG-1	72	49	60	3	0.995922	0.00241093	0.959114	0.00961836	NA
V1	21_tRNA_Leu	Leu-CAG-1	73	50	61	3	0.995756	0.00250879	0.971005	0.00637744	NA
V1	21_tRNA_Leu	Leu-CAG-1	74	51	62	3	0.99609	0.00140556	0.973594	0.00579536	NA
V1	21_tRNA_Leu	Leu-CAG-1	75	52	63	3	0.998669	0.000562697	0.975497	0.00543423	NA
V1	21_tRNA_Leu	Leu-CAG-1	76	53	64	3	0.998087	0.00119872	0.976258	0.00529645	NA
V1	21_tRNA_Leu	Leu-CAG-1	77	54	65	3	0.999085	0.000438932	0.976567	0.00514654	m5U
V1	21_tRNA_Leu	Leu-CAG-1	78	55	66	3	0.999418	0.000472919	0.976888	0.00489919	Y
V1	21_tRNA_Leu	Leu-CAG-1	79	56	67	3	0.996092	0.00238748	0.977153	0.00444032	NA
V1	21_tRNA_Leu	Leu-CAG-1	80	57	68	3	0.999002	0.000648439	0.98127	0.00468871	NA
V1	21_tRNA_Leu	Leu-CAG-1	81	58	69	3	0.999543	0.000314204	0.985203	0.00434326	NA
V1	21_tRNA_Leu	Leu-CAG-1	82	59	70	3	0.998212	0.00122453	0.990552	0.00352027	NA
V1	21_tRNA_Leu	Leu-CAG-1	83	60	71	3	0.995052	0.00306988	0.995918	0.00156742	NA
V1	21_tRNA_Leu	Leu-CAG-1	84	61	72	3	0.997796	0.00118803	0.99974	0.000236491	NA
V1	21_tRNA_Leu	Leu-CAG-1	85	62	73	3	0.998296	0.000562665	1	0	NA
V1	21_tRNA_Leu	Leu-CAG-1	86	63	74	3	0.998337	0.00068761	0.999972	2.67e-05	NA
V1	21_tRNA_Leu	Leu-CAG-1	87	64	75	3	0.999001	0.000450789	0.999028	0.000228558	NA
V1	21_tRNA_Leu	Leu-CAG-1	88	65	76	3	0.998918	0.000563331	0.998973	0.000207851	NA
V1	21_tRNA_Leu	Leu-CAG-1	89	66	77	3	0.998793	0.000474713	0.998785	0.000274377	NA
V1	21_tRNA_Leu	Leu-CAG-1	90	67	78	3	0.998667	0.000642904	0.997422	0.000363027	NA
V1	21_tRNA_Leu	Leu-CAG-1	91	68	79	3	0.977883	0.0108019	0.971083	0.000621461	NA
V1	21_tRNA_Leu	Leu-CAG-1	92	69	80	3	0.998709	0.000712301	0.997602	0.000514412	NA
V1	21_tRNA_Leu	Leu-CAG-1	93	70	81	3	0.998373	0.000784605	0.996285	0.00108439	NA
V1	21_tRNA_Leu	Leu-CAG-1	94	71	82	3	0.998829	0.000595202	0.994669	0.00114742	NA
V1	21_tRNA_Leu	Leu-CAG-1	95	72	83	3	0.998422	0.000499439	0.970273	0.00936193	NA
V1	21_tRNA_Leu	Leu-CAG-1	96	73	84	3	0.999561	0.000209243	0.937433	0.00788628	NA
V1	21_tRNA_Leu	Leu-CAG-1	97	74	85	3	1	0	0.884227	0.00944634	NA
V1	21_tRNA_Leu	Leu-CAG-1	98	75	86	3	1	0	0.64163	0.0446299	NA
V1	21_tRNA_Leu	Leu-CAG-1	99	76	87	3	1	0	0.566558	0.0468135	NA
V1	22_tRNA_Leu	Leu-GAG-1	1	0	NA	NA	NA	NA	NA	NA	NA
V1	22_tRNA_Leu	Leu-GAG-1	2	1	1	1	1	NA	0.0237747	NA	NA
V1	22_tRNA_Leu	Leu-GAG-1	3	2	2	1	1	NA	0.0250549	NA	NA
V1	22_tRNA_Leu	Leu-GAG-1	4	3	3	1	1	NA	0.0261522	NA	NA
V1	22_tRNA_Leu	Leu-GAG-1	5	4	4	1	0.986301	NA	0.0267008	NA	NA
V1	22_tRNA_Leu	Leu-GAG-1	6	5	5	1	1	NA	0.0268837	NA	NA
V1	22_tRNA_Leu	Leu-GAG-1	7	6	6	1	0.979866	NA	0.0270666	NA	NA
V1	22_tRNA_Leu	Leu-GAG-1	8	7	7	1	0.993506	NA	0.0281639	NA	NA
V1	22_tRNA_Leu	Leu-GAG-1	9	8	8	1	0.9875	NA	0.0292612	NA	NA
V1	22_tRNA_Leu	Leu-GAG-1	10	9	9	1	0.993976	NA	0.0303584	NA	NA
V1	22_tRNA_Leu	Leu-GAG-1	11	10	10	1	0.982558	NA	0.0314557	NA	NA
V1	22_tRNA_Leu	Leu-GAG-1	12	11	11	1	0.994318	NA	0.0320044	NA	NA
V1	22_tRNA_Leu	Leu-GAG-1	13	12	12	1	0.994444	NA	0.0329188	NA	NA
V1	22_tRNA_Leu	Leu-GAG-1	14	13	13	1	1	NA	0.0343819	NA	NA
V1	22_tRNA_Leu	Leu-GAG-1	15	14	14	1	0.994949	NA	0.0362107	NA	NA
V1	22_tRNA_Leu	Leu-GAG-1	16	15	15	1	0.99505	NA	0.0369422	NA	NA
V1	22_tRNA_Leu	Leu-GAG-1	17	16	16	1	0.992248	NA	0.0468178	NA	D
V1	22_tRNA_Leu	Leu-GAG-1	18	17	17	1	1	NA	0.0504755	NA	D
V1	22_tRNA_Leu	Leu-GAG-1	19	17A	NA	NA	NA	NA	NA	NA	NA
V1	22_tRNA_Leu	Leu-GAG-1	20	18	18	1	1	NA	0.0532187	NA	Gm
V1	22_tRNA_Leu	Leu-GAG-1	21	19	19	1	0.996656	NA	0.0546818	NA	NA
V1	22_tRNA_Leu	Leu-GAG-1	22	20	20	1	0.996865	NA	0.0583394	NA	D
V1	22_tRNA_Leu	Leu-GAG-1	23	20A	21	1	0.987988	NA	0.0608998	NA	NA
V1	22_tRNA_Leu	Leu-GAG-1	24	20B	NA	NA	NA	NA	NA	NA	NA
V1	22_tRNA_Leu	Leu-GAG-1	25	21	22	1	0.982808	NA	0.0638259	NA	NA
V1	22_tRNA_Leu	Leu-GAG-1	26	22	23	1	0.991667	NA	0.0654718	NA	NA
V1	22_tRNA_Leu	Leu-GAG-1	27	23	24	1	0.98913	NA	0.0669349	NA	NA
V1	22_tRNA_Leu	Leu-GAG-1	28	24	25	1	1	NA	0.0682151	NA	NA
V1	22_tRNA_Leu	Leu-GAG-1	29	25	26	1	0.98939	NA	0.0689466	NA	NA
V1	22_tRNA_Leu	Leu-GAG-1	30	26	27	1	0.989583	NA	0.0702268	NA	NA
V1	22_tRNA_Leu	Leu-GAG-1	31	27	28	1	0.992347	NA	0.0716898	NA	NA
V1	22_tRNA_Leu	Leu-GAG-1	32	28	29	1	1	NA	0.0724214	NA	NA
V1	22_tRNA_Leu	Leu-GAG-1	33	29	30	1	1	NA	0.0727871	NA	NA
V1	22_tRNA_Leu	Leu-GAG-1	34	30	31	1	1	NA	0.0731529	NA	NA
V1	22_tRNA_Leu	Leu-GAG-1	35	31	32	1	0.997519	NA	0.0737015	NA	NA
V1	22_tRNA_Leu	Leu-GAG-1	36	32	33	1	0.989664	NA	0.0704097	NA	NA
V1	22_tRNA_Leu	Leu-GAG-1	37	33	34	1	1	NA	0.0702268	NA	NA
V1	22_tRNA_Leu	Leu-GAG-1	38	34	35	1	0.984211	NA	0.0693124	NA	NA
V1	22_tRNA_Leu	Leu-GAG-1	39	35	36	1	0.989664	NA	0.0704097	NA	NA
V1	22_tRNA_Leu	Leu-GAG-1	40	36	37	1	0.976804	NA	0.0696781	NA	NA
V1	22_tRNA_Leu	Leu-GAG-1	41	37	38	1	0.80829	NA	0.0660205	NA	m1G
V1	22_tRNA_Leu	Leu-GAG-1	42	38	39	2	0.986081	0.0101932	0.139385	0.0171106	Y
V1	22_tRNA_Leu	Leu-GAG-1	43	39	40	2	0.997368	0.00372162	0.152402	0.0189669	NA
V1	22_tRNA_Leu	Leu-GAG-1	44	40	41	2	0.986186	0.00299493	0.16158	0.0190148	NA
V1	22_tRNA_Leu	Leu-GAG-1	45	41	42	2	0.994136	0.000165275	0.165401	0.0179531	NA
V1	22_tRNA_Leu	Leu-GAG-1	46	42	43	2	0.995918	0.00240173	0.165164	0.0168414	NA
V1	22_tRNA_Leu	Leu-GAG-1	47	43	44	2	0.993015	0.00656618	0.166115	0.0140486	NA
V1	22_tRNA_Leu	Leu-GAG-1	48	44	45	2	0.999427	0.000810902	0.169297	0.0138921	NA
V1	22_tRNA_Leu	Leu-GAG-1	49	45	46	2	0.996622	0.00477775	0.173739	0.0162949	NA
V1	22_tRNA_Leu	Leu-GAG-1	50	45A	47	2	0.996909	0.0043716	0.138395	0.0286428	NA
V1	22_tRNA_Leu	Leu-GAG-1	51	45B	48	2	0.984527	0.004635	0.141869	0.0309684	NA
V1	22_tRNA_Leu	Leu-GAG-1	52	45C	49	2	0.959106	0.00577543	0.14441	0.0317171	NA
V1	22_tRNA_Leu	Leu-GAG-1	53	45D	50	3	0.979295	0.00782246	0.286004	0.048701	NA
V1	22_tRNA_Leu	Leu-GAG-1	54	45E	51	3	0.998818	0.00122128	0.358693	0.0528402	NA
V1	22_tRNA_Leu	Leu-GAG-1	55	45F	52	3	0.989221	0.00396827	0.4002	0.0582484	NA
V1	22_tRNA_Leu	Leu-GAG-1	56	45G	53	3	0.997207	0.00288901	0.463397	0.0603079	NA
V1	22_tRNA_Leu	Leu-GAG-1	57	45H	54	3	0.978059	0.00750581	0.496453	0.0625815	NA
V1	22_tRNA_Leu	Leu-GAG-1	58	45I	55	3	0.989175	0.00264514	0.525947	0.0586689	NA
V1	22_tRNA_Leu	Leu-GAG-1	59	45J	56	3	0.994016	0.00369949	0.545982	0.0572619	NA
V1	22_tRNA_Leu	Leu-GAG-1	60	45K	57	3	0.997023	0.00260004	0.573467	0.0582022	NA
V1	22_tRNA_Leu	Leu-GAG-1	61	45L	58	3	0.997189	0.00149299	0.617562	0.0635835	NA
V1	22_tRNA_Leu	Leu-GAG-1	62	45M	59	3	0.998149	0.00160435	0.650448	0.0603757	NA
V1	22_tRNA_Leu	Leu-GAG-1	63	45N	NA	NA	NA	NA	NA	NA	NA
V1	22_tRNA_Leu	Leu-GAG-1	64	45O	NA	NA	NA	NA	NA	NA	NA
V1	22_tRNA_Leu	Leu-GAG-1	65	45P	NA	NA	NA	NA	NA	NA	NA
V1	22_tRNA_Leu	Leu-GAG-1	66	45Q	NA	NA	NA	NA	NA	NA	NA
V1	22_tRNA_Leu	Leu-GAG-1	67	45R	NA	NA	NA	NA	NA	NA	NA
V1	22_tRNA_Leu	Leu-GAG-1	68	45S	NA	NA	NA	NA	NA	NA	NA
V1	22_tRNA_Leu	Leu-GAG-1	69	46	NA	NA	NA	NA	NA	NA	NA
V1	22_tRNA_Leu	Leu-GAG-1	70	47	NA	NA	NA	NA	NA	NA	NA
V1	22_tRNA_Leu	Leu-GAG-1	71	48	NA	NA	NA	NA	NA	NA	NA
V1	22_tRNA_Leu	Leu-GAG-1	72	49	60	3	0.997608	0.00228005	0.71501	0.0535712	NA
V1	22_tRNA_Leu	Leu-GAG-1	73	50	61	3	0.996073	0.00373513	0.767262	0.0545142	NA
V1	22_tRNA_Leu	Leu-GAG-1	74	51	62	3	0.993898	0.00180518	0.786391	0.0552706	NA
V1	22_tRNA_Leu	Leu-GAG-1	75	52	63	3	0.998305	0.0014767	0.812948	0.0469461	NA
V1	22_tRNA_Leu	Leu-GAG-1	76	53	64	3	0.995904	0.0016326	0.827412	0.0444372	NA
V1	22_tRNA_Leu	Leu-GAG-1	77	54	65	3	0.998046	0.000839564	0.836558	0.0423617	m5U
V1	22_tRNA_Leu	Leu-GAG-1	78	55	66	3	0.999468	0.000587588	0.840792	0.0404523	Y
V1	22_tRNA_Leu	Leu-GAG-1	79	56	67	3	0.995256	0.00118818	0.851174	0.0386832	NA
V1	22_tRNA_Leu	Leu-GAG-1	80	57	68	3	0.999009	0.000889698	0.883868	0.031241	NA
V1	22_tRNA_Leu	Leu-GAG-1	81	58	69	3	0.999796	0.000352544	0.903033	0.0294563	NA
V1	22_tRNA_Leu	Leu-GAG-1	82	59	70	3	0.99629	0.00191812	0.931796	0.0201088	NA
V1	22_tRNA_Leu	Leu-GAG-1	83	60	71	3	0.997326	0.000679546	0.976933	0.00927153	NA
V1	22_tRNA_Leu	Leu-GAG-1	84	61	72	3	0.998311	0.000792467	0.998594	0.00137291	NA
V1	22_tRNA_Leu	Leu-GAG-1	85	62	73	3	0.999269	0.00126658	0.999659	0.000590942	NA
V1	22_tRNA_Leu	Leu-GAG-1	86	63	74	3	0.995568	0.00133946	0.999204	0.000744506	NA
V1	22_tRNA_Leu	Leu-GAG-1	87	64	75	3	0.996687	0.00151458	0.944693	0.0145311	NA
V1	22_tRNA_Leu	Leu-GAG-1	88	65	76	3	0.998666	0.000242797	0.944632	0.0144259	NA
V1	22_tRNA_Leu	Leu-GAG-1	89	66	77	3	0.998875	0.00114236	0.94451	0.0142155	NA
V1	22_tRNA_Leu	Leu-GAG-1	90	67	78	3	0.998285	0.00070194	0.944266	0.0137948	NA
V1	22_tRNA_Leu	Leu-GAG-1	91	68	79	3	0.996872	0.00142377	0.942755	0.0137849	NA
V1	22_tRNA_Leu	Leu-GAG-1	92	69	80	3	0.997071	0.000653925	0.941959	0.0136862	NA
V1	22_tRNA_Leu	Leu-GAG-1	93	70	81	3	0.997177	0.00143639	0.93935	0.0118719	NA
V1	22_tRNA_Leu	Leu-GAG-1	94	71	82	3	0.996742	0.00116341	0.929319	0.0130551	NA
V1	22_tRNA_Leu	Leu-GAG-1	95	72	83	3	0.998665	0.00152295	0.686712	0.0340279	NA
V1	22_tRNA_Leu	Leu-GAG-1	96	73	84	3	0.999415	0.00080213	0.681751	0.0352671	NA
V1	22_tRNA_Leu	Leu-GAG-1	97	74	85	3	1	0	0.668124	0.0357743	NA
V1	22_tRNA_Leu	Leu-GAG-1	98	75	86	3	1	0	0.525226	0.0714392	NA
V1	22_tRNA_Leu	Leu-GAG-1	99	76	87	3	1	0	0.479809	0.0720223	NA
V1	24_tRNA_Leu	Leu-TAA-1	1	0	NA	NA	NA	NA	NA	NA	NA
V1	24_tRNA_Leu	Leu-TAA-1	2	1	1	NA	NA	NA	NA	NA	NA
V1	24_tRNA_Leu	Leu-TAA-1	3	2	2	NA	NA	NA	NA	NA	NA
V1	24_tRNA_Leu	Leu-TAA-1	4	3	3	NA	NA	NA	NA	NA	NA
V1	24_tRNA_Leu	Leu-TAA-1	5	4	4	NA	NA	NA	NA	NA	NA
V1	24_tRNA_Leu	Leu-TAA-1	6	5	5	NA	NA	NA	NA	NA	NA
V1	24_tRNA_Leu	Leu-TAA-1	7	6	6	NA	NA	NA	NA	NA	NA
V1	24_tRNA_Leu	Leu-TAA-1	8	7	7	NA	NA	NA	NA	NA	NA
V1	24_tRNA_Leu	Leu-TAA-1	9	8	8	NA	NA	NA	NA	NA	s4U
V1	24_tRNA_Leu	Leu-TAA-1	10	9	9	NA	NA	NA	NA	NA	NA
V1	24_tRNA_Leu	Leu-TAA-1	11	10	10	NA	NA	NA	NA	NA	NA
V1	24_tRNA_Leu	Leu-TAA-1	12	11	11	NA	NA	NA	NA	NA	NA
V1	24_tRNA_Leu	Leu-TAA-1	13	12	12	NA	NA	NA	NA	NA	NA
V1	24_tRNA_Leu	Leu-TAA-1	14	13	13	NA	NA	NA	NA	NA	NA
V1	24_tRNA_Leu	Leu-TAA-1	15	14	14	NA	NA	NA	NA	NA	NA
V1	24_tRNA_Leu	Leu-TAA-1	16	15	15	NA	NA	NA	NA	NA	NA
V1	24_tRNA_Leu	Leu-TAA-1	17	16	16	NA	NA	NA	NA	NA	D
V1	24_tRNA_Leu	Leu-TAA-1	18	17	17	NA	NA	NA	NA	NA	NA
V1	24_tRNA_Leu	Leu-TAA-1	19	17A	NA	NA	NA	NA	NA	NA	NA
[truncated: 14,633 more rows]
