# Supplementary material for: Gel-free library preparation for next-generation RNA sequencing and small RNA quantification
Source: Research Square preprint supplement (doi:10.21203/rs.3.rs-7256873/v1), 2025-10-08
Supplement: Supplementary file 6 [file 68037d1feb5d324c6dd4b862.xlsx]

## Sheet: Sheet1
Modification	Modification (Short Name)	Standardized Position on tRNAs	Number of tRNAs with Modification	tRNAs with Modification
N4-acetylcytidine	ac4C	34	1	Met-CAT-1
3-(3-amino-3-carboxypropyl)uridine	acp3U	45B	8	Arg-ACG-1|Ile-GAT-1|Ile2-CAT-1|Lys-TTT-1|Met-CAT-1|Phe-GAA-1|Val-GAC-1|Val-GAC-2
2'-O-methylcytidine	Cm	32	5	Ser-TGA-1|Thr-TGT-1|Trp-CCA-1|fMet-CAT-1|fMet-CAT-2
2'-O-methylcytidine	Cm	34	1	Leu-CAA-1
5-carboxymethylaminomethyl-2-thiouridine	cmnm5s2U	34	1	Gln-TTG-1
5-carboxymethylaminomethyl-2'-O-methyluridine	cmnm5Um	34	1	Leu-TAA-1
uridine 5-oxyacetic acid	cmo5U	34	5	Ala-TGC-1|Leu-TAG-1|Ser-TGA-1|Thr-TGT-1|Val-TAC-1
dihydrouridine	D	16	17	Asn-GTT-1|Asp-GTC-1|Gly-GCC-1|His-GTG-1|Leu-CAA-1|Leu-CAG-1|Leu-GAG-1|Leu-TAA-1|Leu-TAG-1|Lys-TTT-1|Met-CAT-1|Phe-GAA-1|Thr-GGT-1|Thr-GGT-2|Trp-CCA-1|Val-GAC-1|Val-GAC-2
dihydrouridine	D	17	18	Ala-GGC-1|Ala-TGC-1|Arg-ACG-1|Arg-CCG-1|Gly-GCC-1|His-GTG-1|Ile-GAT-1|Leu-CAG-1|Leu-GAG-1|Leu-TAG-1|Lys-TTT-1|Met-CAT-1|Thr-GGT-1|Thr-GGT-2|Trp-CCA-1|Val-GAC-1|Val-GAC-2|Val-TAC-1
dihydrouridine	D	20	29	Asn-GTT-1|Asp-GTC-1|Cys-GCA-1|Gln-CTG-1|Gln-TTG-1|Gly-CCC-1|Gly-GCC-1|His-GTG-1|Ile-GAT-1|Ile2-CAT-1|Leu-CAA-1|Leu-CAG-1|Leu-GAG-1|Leu-TAA-1|Lys-TTT-1|Met-CAT-1|Phe-GAA-1|Pro-CGG-1|SeC-TCA-1|Ser-GGA-1|Ser-TGA-1|Thr-GGT-1|Thr-GGT-2|Thr-TGT-1|Trp-CCA-1|Val-GAC-1|Val-GAC-2|fMet-CAT-1|fMet-CAT-2
dihydrouridine	D	20A	12	Arg-ACG-1|Arg-CCG-1|Asp-GTC-1|Ile-GAT-1|Ile2-CAT-1|Met-CAT-1|Ser-CGA-1|Ser-GCT-1|Ser-GGA-1|Ser-TGA-1|Val-GAC-1|Val-GAC-2
dihydrouridine	D	21	1	Cys-GCA-1
glutamyl-queuosine	gluQ	34	1	Asp-GTC-1
2'-O-methylguanosine	Gm	18	14	Gln-CTG-1|Gln-TTG-1|Ile2-CAT-1|Leu-CAA-1|Leu-CAG-1|Leu-GAG-1|Leu-TAA-1|Leu-TAG-1|Met-CAT-1|Ser-CGA-1|Ser-GGA-1|Ser-TGA-1|Tyr-GTA-1|Tyr-GTA-2
inosine	I	34	1	Arg-ACG-1
N6-isopentenyladenosine	i6A	37	1	SeC-TCA-1
2-lysidine	k2C	34	1	Ile2-CAT-1
1-methylguanosine	m1G	37	5	Arg-CCG-1|Leu-CAG-1|Leu-GAG-1|Leu-TAG-1|Pro-CGG-1
2-methyladenosine	m2A	37	6	Arg-ACG-1|Asp-GTC-1|Gln-CTG-1|Gln-TTG-1|Glu-TTC-1|His-GTG-1
5-methyluridine	m5U	53	1	SeC-TCA-1
5-methyluridine	m5U	54	41	Ala-GGC-1|Ala-TGC-1|Arg-ACG-1|Arg-CCG-1|Arg-TCT-1|Asn-GTT-1|Asp-GTC-1|Cys-GCA-1|Gln-CTG-1|Gln-TTG-1|Glu-TTC-1|Gly-CCC-1|Gly-GCC-1|Gly-TCC-1|His-GTG-1|Ile-GAT-1|Ile2-CAT-1|Leu-CAA-1|Leu-CAG-1|Leu-GAG-1|Leu-TAA-1|Leu-TAG-1|Lys-TTT-1|Met-CAT-1|Phe-GAA-1|Pro-CGG-1|Ser-CGA-1|Ser-GCT-1|Ser-GGA-1|Ser-TGA-1|Thr-GGT-1|Thr-GGT-2|Thr-TGT-1|Trp-CCA-1|Tyr-GTA-1|Tyr-GTA-2|Val-GAC-1|Val-GAC-2|Val-TAC-1|fMet-CAT…
N6-methyladenosine	m6A	37	1	Val-TAC-1
N6-methyl-N6-threonylcarbamoyladenosine	m6t6A	37	2	Thr-GGT-1|Thr-GGT-2
7-methylguanosine	m7G	45A	22	Ala-GGC-1|Ala-TGC-1|Arg-ACG-1|Arg-CCG-1|Asn-GTT-1|Asp-GTC-1|Gly-GCC-1|His-GTG-1|Ile-GAT-1|Ile2-CAT-1|Lys-TTT-1|Met-CAT-1|Phe-GAA-1|Pro-CGG-1|Thr-GGT-1|Thr-GGT-2|Thr-TGT-1|Trp-CCA-1|Val-GAC-1|Val-GAC-2|Val-TAC-1|fMet-CAT-1
5-methylaminomethyl-2-thiouridine	mnm5s2U	34	2	Glu-TTC-1|Lys-TTT-1
5-methylaminomethyluridine	mnm5U	34	2	Arg-TCT-1|Gly-TCC-1
2-methylthio-N6-isopentenyladenosine	ms2i6A	37	9	Cys-GCA-1|Leu-CAA-1|Leu-TAA-1|Phe-GAA-1|Ser-CGA-1|Ser-TGA-1|Trp-CCA-1|Tyr-GTA-1|Tyr-GTA-2
queuosine	Q	34	4	Asn-GTT-1|His-GTG-1|Tyr-GTA-1|Tyr-GTA-2
2-thiocytidine	s2C	32	4	Arg-ACG-1|Arg-CCG-1|Arg-TCT-1|Ser-GCT-1
4-thiouridine	s4U	10	1	SeC-TCA-1
4-thiouridine	s4U	8	25	Arg-ACG-1|Asn-GTT-1|Asp-GTC-1|Cys-GCA-1|Gln-CTG-1|Gln-TTG-1|Gly-CCC-1|Gly-GCC-1|His-GTG-1|Ile2-CAT-1|Leu-CAA-1|Leu-TAA-1|Met-CAT-1|Phe-GAA-1|Ser-GCT-1|Ser-GGA-1|Ser-TGA-1|Trp-CCA-1|Tyr-GTA-1|Tyr-GTA-2|Val-GAC-1|Val-GAC-2|Val-TAC-1|fMet-CAT-1|fMet-CAT-2
4-thiouridine	s4U	9	2	Tyr-GTA-1|Tyr-GTA-2
N6-threonylcarbamoyladenosine	t6A	37	8	Arg-TCT-1|Asn-GTT-1|Ile-GAT-1|Ile2-CAT-1|Lys-TTT-1|Met-CAT-1|Ser-GCT-1|Thr-TGT-1
2'-O-methyluridine	Um	32	2	Gln-CTG-1|Gln-TTG-1
unknown modified cytidine	xC	45N	1	Ser-GGA-1
pseudouridine	Y	13	1	Glu-TTC-1
pseudouridine	Y	32	4	Cys-GCA-1|Leu-CAA-1|Leu-TAA-1|Phe-GAA-1
pseudouridine	Y	35	2	Tyr-GTA-1|Tyr-GTA-2
pseudouridine	Y	38	6	Gln-CTG-1|Gln-TTG-1|His-GTG-1|Leu-CAG-1|Leu-GAG-1|Leu-TAG-1
pseudouridine	Y	39	12	Asn-GTT-1|Cys-GCA-1|Gln-CTG-1|His-GTG-1|Ile2-CAT-1|Leu-CAA-1|Leu-TAA-1|Lys-TTT-1|Met-CAT-1|Phe-GAA-1|Tyr-GTA-1|Tyr-GTA-2
pseudouridine	Y	40	3	Arg-TCT-1|Leu-CAG-1|Ser-GGA-1
pseudouridine	Y	54	1	SeC-TCA-1
pseudouridine	Y	55	41	Ala-GGC-1|Ala-TGC-1|Arg-ACG-1|Arg-CCG-1|Arg-TCT-1|Asn-GTT-1|Asp-GTC-1|Cys-GCA-1|Gln-CTG-1|Gln-TTG-1|Glu-TTC-1|Gly-CCC-1|Gly-GCC-1|Gly-TCC-1|His-GTG-1|Ile-GAT-1|Ile2-CAT-1|Leu-CAA-1|Leu-CAG-1|Leu-GAG-1|Leu-TAA-1|Leu-TAG-1|Lys-TTT-1|Met-CAT-1|Phe-GAA-1|Pro-CGG-1|Ser-CGA-1|Ser-GCT-1|Ser-GGA-1|Ser-TGA-1|Thr-GGT-1|Thr-GGT-2|Thr-TGT-1|Trp-CCA-1|Tyr-GTA-1|Tyr-GTA-2|Val-GAC-1|Val-GAC-2|Val-TAC-1|fMet-CAT…
pseudouridine	Y	65	2	Asp-GTC-1|Ile-GAT-1
