# Supplementary material for: Gel-free library preparation for next-generation RNA sequencing and small RNA quantification
Source: Research Square preprint supplement (doi:10.21203/rs.3.rs-7256873/v1), 2025-10-08
Supplement: Supplementary file 7 [file 7809ba0e7496dcb0bfc5abd6.xlsx]

## Sheet: Sheet1
Oligonucleotide	Sequence (5' - 3')	Remarks
Internal standard	ACCCACGGCAGAGUGUGUGUGGCCCACGCGAUUCGUGAAUAACAUAACUAUGAGUAGGAUAAGGAAUGUCACCUAACAGC	80 nt in length; 40% GC content; included to benchmark the performance of the method; prepare a woking solution (0.5 μM) and store it at -20ºC
Linker 1	/5’Phos/-NNCACTCGGGCACCAAGGA-ddC-3’	Custom 18-nt DNA adaptor with two additional random nucleotides attached to the 5' end and a dideoxycytidine (ddC) at the 3' end; prepare a working solution (100 pmol/μL) and store it at -20ºC
Linker 2	/5’Phos/TGAAGAGCCTAGTCGCTGTTCANNNNNNCTGCCCATAGAG-SpC-3’	Custom 40-nt DNA adaptor with a hairpin secondary structure (formed by the two underscored sub-sequences), a random hexamer sequence, and a spacer at the 5' end; prepare a working solution (50 pmol/μL) and store it at -20ºC
Reverse transcription (RT) primer	5’-G*T*C* C*T*T* GGT GCC CGA GTG-OH-3’	Custom 18-nt DNA oligo that (i) is reverse complementary to the 3' end of Linker 1 and (ii) possesses 6 phosphorothioate modifications (*) at the 5' end; prepare a working solution (2 μL) and store it at -20ºC
PCR forward primer #1	AATGATACGGCGACCACCGAGATCTACACAGAGAGACACTCTTTCCCTACACGACGCTCTTCCGATCTTGAACAGCGACTAGGCTCTTCA	The index sequence is underscored; prepare a working solution (2.5 μM) for each forward primer and store it at -20ºC
PCR forward primer #2	AATGATACGGCGACCACCGAGATCTACACGTGTGTACACTCTTTCCCTACACGACGCTCTTCCGATCTTGAACAGCGACTAGGCTCTTCA	The index sequence is underscored; prepare a working solution (2.5 μM) for each forward primer and store it at -20ºC
PCR forward primer #3	AATGATACGGCGACCACCGAGATCTACACTCTCTCACACTCTTTCCCTACACGACGCTCTTCCGATCTTGAACAGCGACTAGGCTCTTCA	The index sequence is underscored; prepare a working solution (2.5 μM) for each forward primer and store it at -20ºC
PCR forward primer #4	AATGATACGGCGACCACCGAGATCTACACCACACAACACTCTTTCCCTACACGACGCTCTTCCGATCTTGAACAGCGACTAGGCTCTTCA	The index sequence is underscored; prepare a working solution (2.5 μM) for each forward primer and store it at -20ºC
PCR forward primer #5	AATGATACGGCGACCACCGAGATCTACACCAAGGTACACTCTTTCCCTACACGACGCTCTTCCGATCTTGAACAGCGACTAGGCTCTTCA	The index sequence is underscored; prepare a working solution (2.5 μM) for each forward primer and store it at -20ºC
PCR forward primer #6	AATGATACGGCGACCACCGAGATCTACACAGGTTCACACTCTTTCCCTACACGACGCTCTTCCGATCTTGAACAGCGACTAGGCTCTTCA	The index sequence is underscored; prepare a working solution (2.5 μM) for each forward primer and store it at -20ºC
PCR reverse primer #1	CAAGCAGAAGACGGCATACGAGATCCTGAGCGGTCTCGGCATTCCTGCTGAACCGCTCTTCCGATCTGTCCTTGGTGCCCGAGTG	The index sequence is underscored; prepare a working solution (2.5 μM) for each forward primer and store it at -20ºC
PCR reverse primer #2	CAAGCAGAAGACGGCATACGAGATTGCTGTCGGTCTCGGCATTCCTGCTGAACCGCTCTTCCGATCTGTCCTTGGTGCCCGAGTG	The index sequence is underscored; prepare a working solution (2.5 μM) for each forward primer and store it at -20ºC
PCR reverse primer #3	CAAGCAGAAGACGGCATACGAGATCATCACCGGTCTCGGCATTCCTGCTGAACCGCTCTTCCGATCTGTCCTTGGTGCCCGAGTG	The index sequence is underscored; prepare a working solution (2.5 μM) for each forward primer and store it at -20ºC
PCR reverse primer #4	CAAGCAGAAGACGGCATACGAGATTTCAGACGGTCTCGGCATTCCTGCTGAACCGCTCTTCCGATCTGTCCTTGGTGCCCGAGTG	The index sequence is underscored; prepare a working solution (2.5 μM) for each forward primer and store it at -20ºC
PCR reverse primer #5	CAAGCAGAAGACGGCATACGAGATACGGTGCGGTCTCGGCATTCCTGCTGAACCGCTCTTCCGATCTGTCCTTGGTGCCCGAGTG	The index sequence is underscored; prepare a working solution (2.5 μM) for each forward primer and store it at -20ºC
PCR reverse primer #6	CAAGCAGAAGACGGCATACGAGATGTAACACGGTCTCGGCATTCCTGCTGAACCGCTCTTCCGATCTGTCCTTGGTGCCCGAGTG	The index sequence is underscored; prepare a working solution (2.5 μM) for each forward primer and store it at -20ºC
Custom forward seuqencing primer	GCTCTTCCGATCTTGAACAGCGACTAGGCTCTTCA	Required for NextSeq; optional for HiSeq, MiSeq, and NovaSeq
Custom reverse sequencing primer	TGAACCGCTCTTCCGATCTGTCCTTGGTGCCCGAGTG	Required for NextSeq; optional for HiSeq, MiSeq, and NovaSeq
