# Supplementary material for: Gel-free library preparation for next-generation RNA sequencing and small RNA quantification
Source: Research Square preprint supplement (doi:10.21203/rs.3.rs-7256873/v1), 2025-10-08
Supplement: Supplementary file 8 [file 98fcd8d557e168f0d1ee7e4a.xlsx]

## Sheet: V1
Name	Company	Catalog Number	Comments
2-ketoglutarate	Sigma-Aldrich	75890	Prepare a working solution (1 M) and store it at -20ºC
2100 Bioanalyzer Instrument	Agilent	G2938C
5'-deadenylase (50 U/μL)	New England Biolabs	M0331S (component #: M0331SVIAL)	Store at -20ºC
Adenosine 5'-Triphosphate (ATP)	New England Biolabs	M0437M (component #: N0437AVIAL)	NEB M0437M contains T4 RNA Ligase 1 (30 U/μL), T4 RNA Ligase Reaction Buffer (10X), PEG 8000 (1X), and ATP (100 mM); prepare a working solution (10 mM) and store it at -20ºC
AGAROSE GPG/LE™	AmericanBio	AB00972-00500	Store at ambient temperature
Ammonium iron(II) sulfate hexahydrate	Sigma-Aldrich	F2262	Prepare a working solution (0.25 M) and store it at -20ºC
Bioanalyzer Small RNA Analysis	Agilent	5067-1548	The Small RNA Analysis is used for checking the quality of input RNAs and the efficiency of enzymatic reactions (e.g., Linker 1 ligation)
Bovine Serum Albumin (BSA; 10 mg/mL)	New England Biolabs	B9000	This product was discontinued on 12/15/2022 and is replaced with Recombinant Albumin, Molecular Biology Grade (NEB B9200).
Chloroform	Macron Fine Chemicals	4441-10	Store at ambient temperature; keep away from light
Demethylase	ArrayStar	AS-FS-004	Demethylase comes with the rtStar™ tRNA Pretreatment & First-Strand cDNA Synthesis Kit (AS-FS-004); store at -20ºC
Deoxynucleotide (dNTP) Solution Mix	New England Biolabs	N0447L (component #: N0447LVIAL)	This dNTP Solution Mix contains equimolar concentrations of dATP, dCTP, dGTP and dTTP (10 mM each); store at -20ºC
Digital Dual Heat Block	VWR Scientific Products	13259-052	Heating block is used with the QIAquick® Gel Extraction Kit
DyeEx 2.0 Spin Kit	Qiagen	63204	Effective at removing short remnants (e.g., oligos less than 10 bp in length); store at ambient temperature
Electrophoresis Power Supply	Bio-Rad Labrotories	PowerPac™ 300
Ethyl alcohol (Ethanol), Pure	Sigma-Aldrich	E7023	The pure ethanol is used with the Oligo Clean and Concentrator Kit from Zymo Research; store at ambient temperature
Gel Imaging System	Alpha Innotech	FluorChem™ 8900
Gel Loading Dye, Purple (6X), no SDS	New England Biolabs	N0556S (component #: B7025SVIAL)	NEB N0556S contains Quick-Load® Purple 50 bp DNA Ladder and Gel Loading Dye, Purple (6X), no SDS; store at 4ºC
HEPES	Sigma-Aldrich	H4034	Prepare a working solution (1 M; pH = 8 with NaOH) and store it at -20ºC
Hydrochloric acid (HCl)	VWR Scientific Products	BDH3028	Prepare a working solution (5 M) and store it at ambient temperature
Isopropyl Alcohol (Isopropanol), Pure	Macron Fine Chemicals	3032-16	Isopropanol is used with the QIAquick® Gel Extraction Kit; store at ambient temperature
L-Ascorbic acid	Sigma-Aldrich	A5960	Prepare a working solution (0.5 M) and store it at -20ºC
Microcentrifuge	Eppendorf	5415D
NanoDrop™ 2000 Spectrophotometer	Thermo Fisher Scientific	ND-2000
NEBuffer™ 2 (10X)	New England Biolabs	M0264L (component #: B7002SVIAL)	NEB M0264L contains RecJf (30 U/μL) and NEBuffer™ 2 (10X); store at -20ºC
Nuclease-Free Water (not DEPC-Treated)	Thermo Fisher Scientific	AM9938	Store at ambient temperature
Oligo Clean & Concentrator Kit	Zymo Research	D4061	Store at ambient temperature
PEG 8000 (50% solution)	New England Biolabs	M0437M (component #: B1004SVIAL)	NEB M0437M contains T4 RNA Ligase 1 (30 U/μL), T4 RNA Ligase Reaction Buffer (10X), PEG 8000 (1X), and ATP (100 mM); prepare a working solution (10 mM) and store it at -20ºC
Peltier Thermal Cycler	MJ Research	PTC-200
Phenol:choloroform:isoamyl alcohol 25:24:1 pH = 5.2	Thermo Fisher Scientific	J62336	Store at 4ºC
PrimeScript™ Buffer (5X)	TaKaRa	2680A	Store at -20ºC
PrimeScript™ Reverse Transcriptase	TaKaRa	2680A	Store at -20ºC
QIAquick® Gel Extraction Kit	Qiagen	28704	This kit requires a heating block and isopropanol to work with; store at ambient temperature
Quick-Load® Purple 100 bp DNA Ladder	New England Biolabs	N0551S (component #: N0551SVIAL)	Store at 4ºC
Quick-Load® Purple 50 bp DNA Ladder	New England Biolabs	N0556S (component #: N0556SVIAL)	NEB N0556S contains Quick-Load® Purple 50 bp DNA Ladder and Gel Loading Dye, Purple (6X), no SDS; store at 4ºC
RecJf (30 U/μL)	New England Biolabs	M0264L (component #: M0264LVIAL)	NEB M0264L contains RecJf (30 U/μL) and NEBuffer™ 2 (10X); store at -20ºC
RNase Inhibitor (murine; 40 U/μL)	New England Biolabs	M0314L (component #: M0314LVIAL)	Store at -20ºC
SeqAMP™ DNA Polymerase	TaKaRa	638509	TaKaRa 638509 contains SeqAMP™ DNA Polymerase and SeqAMP™ PCR Buffer (2X); store at -20ºC
SeqAMP™ PCR Buffer (2X)	TaKaRa	638509	TaKaRa 638509 contains SeqAMP™ DNA Polymerase and SeqAMP™ PCR Buffer (2X); store at -20ºC
Shrimp Alkaline Phosphatase (1 U/μL)	New England Biolabs	M0371L (component #: M0371LVIAL)	Store at -20ºC
Sodium hydroxide (NaOH)	Sigma-Aldrich	S5881	Prepare a working solution (5 M) and store it at ambient temperature
T4 DNA Ligase (400 U/μL)	New England Biolabs	M0202L (component #: M0202LVIAL)	NEB M0202L contains T4 DNA Ligase (400 U/μL) and T4 DNA Ligase Reaction Buffer (10X); store at -20ºC
T4 DNA Ligase Reaction Buffer (10X)	New England Biolabs	M0202L (component #: B0202SVIAL)	NEB M0202L contains T4 DNA Ligase (400 U/μL) and T4 DNA Ligase Reaction Buffer (10X); store at -20ºC
T4 RNA Ligase 1 (30 U/μL)	New England Biolabs	M0437M (component #: M0437MVIAL)	NEB M0437M contains T4 RNA Ligase 1 (30 U/μL), T4 RNA Ligase Reaction Buffer (10X), PEG 8000 (1X), and ATP (100 mM); store at -20ºC
T4 RNA Ligase Reaction Buffer (10X)	New England Biolabs	M0437M (component #: B0216SVIAL)	NEB M0437M contains T4 RNA Ligase 1 (30 U/μL), T4 RNA Ligase Reaction Buffer (10X), PEG 8000 (1X), and ATP (100 mM); store at -20ºC

## Sheet: V2
Name	Company	Catalog Number	Comments
2100 Bioanalyzer Instrument	Agilent	G2938C
5'-deadenylase (50 U/μL)	New England Biolabs	M0331S (component #: M0331SVIAL)	Store at -20ºC
Adenosine 5'-Triphosphate (ATP)	New England Biolabs	M0437M (component #: N0437AVIAL)	NEB M0437M contains T4 RNA Ligase 1 (30 U/μL), T4 RNA Ligase Reaction Buffer (10X), PEG 8000 (1X), and ATP (100 mM); prepare a working solution (10 mM) and store it at -20ºC
AGAROSE GPG/LE™	AmericanBio	AB00972-00500	Store at ambient temperature
Bioanalyzer Small RNA Analysis	Agilent	5067-1548	The Small RNA Analysis is used for checking the quality of input RNAs and the efficiency of enzymatic reactions (e.g., Linker 1 ligation)
Deoxynucleotide (dNTP) Solution Mix	New England Biolabs	N0447L (component #: N0447LVIAL)	This dNTP Solution Mix contains equimolar concentrations of dATP, dCTP, dGTP and dTTP (10 mM each); store at -20ºC
DTT (100 mM)	Thermo Fisher Scientific	18091050	The SuperScript™ IV First-Strand Synthesis System (18091050) contains SuperScript™ IV Reverse Transcriptase (200 U/μL), SuperScript™ IV RT Reaction Buffer (5X), DTT (100 mM), and Ribonuclease Inhibitor (40 U/μL); store at -20ºC
Digital Dual Heat Block	VWR Scientific Products	13259-052	Heating block is used with the QIAquick® Gel Extraction Kit
DyeEx 2.0 Spin Kit	Qiagen	63204	Effective at removing short remnants (e.g., oligos less than 10 bp in length); store at ambient temperature
Electrophoresis Power Supply	Bio-Rad Labrotories	PowerPac™ 300
Ethyl alcohol (Ethanol), Pure	Sigma-Aldrich	E7023	The pure ethanol is used with the Oligo Clean and Concentrator Kit from Zymo Research; store at ambient temperature
Gel Imaging System	Alpha Innotech	FluorChem™ 8900
Gel Loading Dye, Purple (6X), no SDS	New England Biolabs	N0556S (component #: B7025SVIAL)	NEB N0556S contains Quick-Load® Purple 50 bp DNA Ladder and Gel Loading Dye, Purple (6X), no SDS; store at 4ºC
Hydrochloric acid (HCl)	VWR Scientific Products	BDH3028	Prepare a working solution (5 M) and store it at ambient temperature
Isopropyl Alcohol (Isopropanol), Pure	Macron Fine Chemicals	3032-16	Isopropanol is used with the QIAquick® Gel Extraction Kit; store at ambient temperature
Microcentrifuge	Eppendorf	5415D
NanoDrop™ 2000 Spectrophotometer	Thermo Fisher Scientific	ND-2000
NEBuffer™ 2 (10X)	New England Biolabs	M0264L (component #: B7002SVIAL)	NEB M0264L contains RecJf (30 U/μL) and NEBuffer™ 2 (10X); store at -20ºC
Nuclease-Free Water (not DEPC-Treated)	Thermo Fisher Scientific	AM9938	Store at ambient temperature
Oligo Clean & Concentrator Kit	Zymo Research	D4061	Store at ambient temperature
PEG 8000 (50% solution)	New England Biolabs	M0437M (component #: B1004SVIAL)	NEB M0437M contains T4 RNA Ligase 1 (30 U/μL), T4 RNA Ligase Reaction Buffer (10X), PEG 8000 (1X), and ATP (100 mM); prepare a working solution (10 mM) and store it at -20ºC
Peltier Thermal Cycler	MJ Research	PTC-200
QIAquick® Gel Extraction Kit	Qiagen	28704	This kit requires a heating block and isopropanol to work with; store at ambient temperature
Quick-Load® Purple 100 bp DNA Ladder	New England Biolabs	N0551S (component #: N0551SVIAL)	Store at 4ºC
Quick-Load® Purple 50 bp DNA Ladder	New England Biolabs	N0556S (component #: N0556SVIAL)	NEB N0556S contains Quick-Load® Purple 50 bp DNA Ladder and Gel Loading Dye, Purple (6X), no SDS; store at 4ºC
RecJf (30 U/μL)	New England Biolabs	M0264L (component #: M0264LVIAL)	NEB M0264L contains RecJf (30 U/μL) and NEBuffer™ 2 (10X); store at -20ºC
Ribonuclease Inhibitor (40 U/μL)	Thermo Fisher Scientific	18091050	Store at -20ºC
RNase Inhibitor (murine; 40 U/μL)	New England Biolabs	M0314L (component #: M0314LVIAL)	Store at -20ºC
SeqAMP™ DNA Polymerase	TaKaRa	638509	TaKaRa 638509 contains SeqAMP™ DNA Polymerase and SeqAMP™ PCR Buffer (2X); store at -20ºC
SeqAMP™ PCR Buffer (2X)	TaKaRa	638509	TaKaRa 638509 contains SeqAMP™ DNA Polymerase and SeqAMP™ PCR Buffer (2X); store at -20ºC
Shrimp Alkaline Phosphatase (1 U/μL)	New England Biolabs	M0371L (component #: M0371LVIAL)	Store at -20ºC
Sodium hydroxide (NaOH)	Sigma-Aldrich	S5881	Prepare a working solution (5 M) and store it at ambient temperature
SuperScript™ IV Reverse Transcriptase (200 U/μL)	Thermo Fisher Scientific	18091050	Store at -20ºC
SuperScript™ IV RT Reaction Buffer (5X)	Thermo Fisher Scientific	18091050	Store at -20ºC
T4 DNA Ligase (400 U/μL)	New England Biolabs	M0202L (component #: M0202LVIAL)	NEB M0202L contains T4 DNA Ligase (400 U/μL) and T4 DNA Ligase Reaction Buffer (10X); store at -20ºC
T4 DNA Ligase Reaction Buffer (10X)	New England Biolabs	M0202L (component #: B0202SVIAL)	NEB M0202L contains T4 DNA Ligase (400 U/μL) and T4 DNA Ligase Reaction Buffer (10X); store at -20ºC
T4 RNA Ligase 1 (30 U/μL)	New England Biolabs	M0437M (component #: M0437MVIAL)	NEB M0437M contains T4 RNA Ligase 1 (30 U/μL), T4 RNA Ligase Reaction Buffer (10X), PEG 8000 (1X), and ATP (100 mM); store at -20ºC
T4 RNA Ligase Reaction Buffer (10X)	New England Biolabs	M0437M (component #: B0216SVIAL)	NEB M0437M contains T4 RNA Ligase 1 (30 U/μL), T4 RNA Ligase Reaction Buffer (10X), PEG 8000 (1X), and ATP (100 mM); store at -20ºC

## Sheet: V3
Name	Company	Catalog Number	Comments
2-ketoglutarate	Sigma-Aldrich	75890	Prepare a working solution (1 M) and store it at -20ºC
2100 Bioanalyzer Instrument	Agilent	G2938C
5'-deadenylase (50 U/μL)	New England Biolabs	M0331S (component #: M0331SVIAL)	Store at -20ºC
Adenosine 5'-Triphosphate (ATP)	New England Biolabs	M0437M (component #: N0437AVIAL)	NEB M0437M contains T4 RNA Ligase 1 (30 U/μL), T4 RNA Ligase Reaction Buffer (10X), PEG 8000 (1X), and ATP (100 mM); prepare a working solution (10 mM) and store it at -20ºC
AGAROSE GPG/LE™	AmericanBio	AB00972-00500	Store at ambient temperature
Ammonium iron(II) sulfate hexahydrate	Sigma-Aldrich	F2262	Prepare a working solution (0.25 M) and store it at -20ºC
Beta-mercaptoethanol	Sigma-Aldrich	M6250	Made into 1.43 M stock solution; store the stock solution at ambient temperature and away from light
Bioanalyzer Small RNA Analysis	Agilent	5067-1548	The Small RNA Analysis is used for checking the quality of input RNAs and the efficiency of enzymatic reactions (e.g., Linker 1 ligation)
Bovine Serum Albumin (BSA; 10 mg/mL)	New England Biolabs	B9000	This product was discontinued on 12/15/2022 and is replaced with Recombinant Albumin, Molecular Biology Grade (NEB B9200).
Chloroform	Macron Fine Chemicals	4441-10	Store at ambient temperature; keep away from light
Demethylase	ArrayStar	AS-FS-004	Demethylase comes with the rtStar™ tRNA Pretreatment & First-Strand cDNA Synthesis Kit (AS-FS-004); store at -20ºC
Deoxynucleotide (dNTP) Solution Mix	New England Biolabs	N0447L (component #: N0447LVIAL)	This dNTP Solution Mix contains equimolar concentrations of dATP, dCTP, dGTP and dTTP (10 mM each); store at -20ºC
DyeEx 2.0 Spin Kit	Qiagen	63204	Effective at removing short remnants (e.g., oligos less than 10 bp in length); store at ambient temperature
Electrophoresis Power Supply	Bio-Rad Labrotories	PowerPac™ 300
Ethyl alcohol (Ethanol), Pure	Sigma-Aldrich	E7023	The pure ethanol is used with the Oligo Clean and Concentrator Kit from Zymo Research; store at ambient temperature
Gel Imaging System	Alpha Innotech	FluorChem™ 8900
Gel Loading Dye, Purple (6X), no SDS	New England Biolabs	N0556S (component #: B7025SVIAL)	NEB N0556S contains Quick-Load® Purple 50 bp DNA Ladder and Gel Loading Dye, Purple (6X), no SDS; store at 4ºC
HEPES	Sigma-Aldrich	H4034	Prepare a working solution (1 M; pH = 8 with NaOH) and store it at -20ºC
Hydrochloric acid (HCl)	VWR Scientific Products	BDH3028	Prepare a working solution (5 M) and store it at ambient temperature
L-Ascorbic acid	Sigma-Aldrich	A5960	Prepare a working solution (0.5 M) and store it at -20ºC
Microcentrifuge	Eppendorf	5415D
NanoDrop™ 2000 Spectrophotometer	Thermo Fisher Scientific	ND-2000
NEBuffer™ 2 (10X)	New England Biolabs	M0264L (component #: B7002SVIAL)	NEB M0264L contains RecJf (30 U/μL) and NEBuffer™ 2 (10X); store at -20ºC
Nuclease-Free Water (not DEPC-Treated)	Thermo Fisher Scientific	AM9938	Store at ambient temperature
Oligo Clean & Concentrator Kit	Zymo Research	D4061	Store at ambient temperature
PEG 8000 (50% solution)	New England Biolabs	M0437M (component #: B1004SVIAL)	NEB M0437M contains T4 RNA Ligase 1 (30 U/μL), T4 RNA Ligase Reaction Buffer (10X), PEG 8000 (1X), and ATP (100 mM); prepare a working solution (10 mM) and store it at -20ºC
Peltier Thermal Cycler	MJ Research	PTC-200
Phenol:choloroform:isoamyl alcohol 25:24:1 pH = 5.2	Thermo Fisher Scientific	J62336	Store at 4ºC
PrimeScript™ Buffer (5X)	TaKaRa	2680A	Store at -20ºC
PrimeScript™ Reverse Transcriptase	TaKaRa	2680A	Store at -20ºC
QIAquick® PCR Purification Kit	Qiagen	28104	Store at ambient temperature
Quick-Load® Purple 100 bp DNA Ladder	New England Biolabs	N0551S (component #: N0551SVIAL)	Store at 4ºC
Quick-Load® Purple 50 bp DNA Ladder	New England Biolabs	N0556S (component #: N0556SVIAL)	NEB N0556S contains Quick-Load® Purple 50 bp DNA Ladder and Gel Loading Dye, Purple (6X), no SDS; store at 4ºC
RecJf (30 U/μL)	New England Biolabs	M0264L (component #: M0264LVIAL)	NEB M0264L contains RecJf (30 U/μL) and NEBuffer™ 2 (10X); store at -20ºC
RNase Inhibitor (murine; 40 U/μL)	New England Biolabs	M0314L (component #: M0314LVIAL)	Store at -20ºC
SeqAMP™ DNA Polymerase	TaKaRa	638509	TaKaRa 638509 contains SeqAMP™ DNA Polymerase and SeqAMP™ PCR Buffer (2X); store at -20ºC
SeqAMP™ PCR Buffer (2X)	TaKaRa	638509	TaKaRa 638509 contains SeqAMP™ DNA Polymerase and SeqAMP™ PCR Buffer (2X); store at -20ºC
Shrimp Alkaline Phosphatase (1 U/μL)	New England Biolabs	M0371L (component #: M0371LVIAL)	Store at -20ºC
Sodium hydroxide (NaOH)	Sigma-Aldrich	S5881	Prepare a working solution (5 M) and store it at ambient temperature
T4 DNA Ligase (400 U/μL)	New England Biolabs	M0202L (component #: M0202LVIAL)	NEB M0202L contains T4 DNA Ligase (400 U/μL) and T4 DNA Ligase Reaction Buffer (10X); store at -20ºC
T4 DNA Ligase Reaction Buffer (10X)	New England Biolabs	M0202L (component #: B0202SVIAL)	NEB M0202L contains T4 DNA Ligase (400 U/μL) and T4 DNA Ligase Reaction Buffer (10X); store at -20ºC
T4 RNA Ligase 1 (30 U/μL)	New England Biolabs	M0437M (component #: M0437MVIAL)	NEB M0437M contains T4 RNA Ligase 1 (30 U/μL), T4 RNA Ligase Reaction Buffer (10X), PEG 8000 (1X), and ATP (100 mM); store at -20ºC
T4 RNA Ligase Reaction Buffer (10X)	New England Biolabs	M0437M (component #: B0216SVIAL)	NEB M0437M contains T4 RNA Ligase 1 (30 U/μL), T4 RNA Ligase Reaction Buffer (10X), PEG 8000 (1X), and ATP (100 mM); store at -20ºC
Trizma® base (Tris base)	Sigma-Aldrich	T6066	Prepare a working solution (3 M) and store it at ambient temperature

## Sheet: V4
Name	Company	Catalog Number	Comments
2100 Bioanalyzer Instrument	Agilent	G2938C	Bioanalyzer is used for checking the quality of input RNAs and the efficiency of enzymatic reactions (e.g., Linker 1 ligation)
5'-deadenylase (50 U/μL)	New England Biolabs	M0331S (component #: M0331SVIAL)	Store at -20ºC
Adenosine 5'-Triphosphate (ATP)	New England Biolabs	M0437M (component #: N0437AVIAL)	NEB M0437M contains T4 RNA Ligase 1 (30 U/μL), T4 RNA Ligase Reaction Buffer (10X), PEG 8000 (1X), and ATP (100 mM); prepare a working solution (10 mM) and store it at -20ºC
AGAROSE GPG/LE™	AmericanBio	AB00972-00500	Store at ambient temperature
Beta-mercaptoethanol	Sigma-Aldrich	M6250	Made into 1.43 M stock solution; store the stock solution at ambient temperature and away from light
Bioanalyzer Small RNA Analysis	Agilent	5067-1548	The Small RNA Analysis is used for checking the quality of input RNAs and the efficiency of enzymatic reactions (e.g., Linker 1 ligation)
Deoxynucleotide (dNTP) Solution Mix	New England Biolabs	N0447L (component #: N0447LVIAL)	This dNTP Solution Mix contains equimolar concentrations of dATP, dCTP, dGTP and dTTP (10 mM each); store at -20ºC
DTT (100 mM)	Thermo Fisher Scientific	18091050	Store at -20ºC
DyeEx 2.0 Spin Kit	Qiagen	63204	Effective at removing short remnants (e.g., oligos less than 10 bp in length); store at ambient temperature
Electrophoresis Power Supply	Bio-Rad Labrotories	PowerPac™ 300
Ethyl alcohol (Ethanol), Pure	Sigma-Aldrich	E7023	The pure ethanol is used with the Oligo Clean and Concentrator Kit from Zymo Research; store at ambient temperature
Exonuclease I (20 U/μL)	New England Biolabs	M0293S (component #: M0293SVIAL)	Store at -20ºC; prepare a working solution (1 U/μL) freshly prior to each experiment
Gel Imaging System	Alpha Innotech	FluorChem™ 8900
Gel Loading Dye, Purple (6X), no SDS	New England Biolabs	N0556S (component #: B7025SVIAL)	NEB N0556S contains Quick-Load® Purple 50 bp DNA Ladder and Gel Loading Dye, Purple (6X), no SDS; store at 4ºC
Hydrochloric acid (HCl)	VWR Scientific Products	BDH3028	Prepare a working solution (5 M) and store it at ambient temperature
Microcentrifuge	Eppendorf	5415D
NanoDrop™ 2000 Spectrophotometer	Thermo Fisher Scientific	ND-2000	NanoDrop is used for measuring the concentration of nucleic acids
NEBuffer™ 2 (10X)	New England Biolabs	M0264L (component #: B7002SVIAL)	NEB M0264L contains RecJf (30 U/μL) and NEBuffer™ 2 (10X); store at -20ºC
Nuclease-Free Water (not DEPC-Treated)	Thermo Fisher Scientific	AM9938	Store at ambient temperature
Oligo Clean & Concentrator Kit	Zymo Research	D4061	Store at ambient temperature
PEG 8000 (50% solution)	New England Biolabs	M0437M (component #: B1004SVIAL)	NEB M0437M contains T4 RNA Ligase 1 (30 U/μL), T4 RNA Ligase Reaction Buffer (10X), PEG 8000 (1X), and ATP (100 mM); prepare a working solution (10 mM) and store it at -20ºC
Peltier Thermal Cycler	MJ Research	PTC-200
QIAquick® PCR Purification Kit	Qiagen	28104	Store at ambient temperature
Quick-Load® Purple 100 bp DNA Ladder	New England Biolabs	N0551S (component #: N0551SVIAL)	store at 4ºC
Quick-Load® Purple 50 bp DNA Ladder	New England Biolabs	N0556S (component #: N0556SVIAL)	NEB N0556S contains Quick-Load® Purple 50 bp DNA Ladder and Gel Loading Dye, Purple (6X), no SDS; store at 4ºC
RecJf (30 U/μL)	New England Biolabs	M0264L (component #: M0264LVIAL)	NEB M0264L contains RecJf (30 U/μL) and NEBuffer™ 2 (10X); store at -20ºC
Ribonuclease Inhibitor (40 U/μL)	Thermo Fisher Scientific	18091050	Store at -20ºC
RNase Inhibitor (murine; 40 U/μL)	New England Biolabs	M0314L (component #: M0314LVIAL)	Store at -20ºC
SeqAMP™ DNA Polymerase	TaKaRa	638509	TaKaRa 638509 contains SeqAMP™ DNA Polymerase and SeqAMP™ PCR Buffer (2X); store at -20ºC
SeqAMP™ PCR Buffer (2X)	TaKaRa	638509	TaKaRa 638509 contains SeqAMP™ DNA Polymerase and SeqAMP™ PCR Buffer (2X); store at -20ºC
Shrimp Alkaline Phosphatase (1 U/μL)	New England Biolabs	M0371L (component #: M0371LVIAL)	Store at -20ºC
Sodium hydroxide (NaOH)	Sigma-Aldrich	S5881	Prepare a working solution (5 M) and store it at ambient temperature
SuperScript™ IV Reverse Transcriptase (200 U/μL)	Thermo Fisher Scientific	18091050	Store at -20ºC
SuperScript™ IV RT Reaction Buffer (5X)	Thermo Fisher Scientific	18091050	Store at -20ºC
T4 DNA Ligase (400 U/μL)	New England Biolabs	M0202L (component #: M0202LVIAL)	NEB M0202L contains T4 DNA Ligase (400 U/μL) and T4 DNA Ligase Reaction Buffer (10X); store at -20ºC
T4 DNA Ligase Reaction Buffer (10X)	New England Biolabs	M0202L (component #: B0202SVIAL)	NEB M0202L contains T4 DNA Ligase (400 U/μL) and T4 DNA Ligase Reaction Buffer (10X); store at -20ºC
T4 RNA Ligase 1 (30 U/μL)	New England Biolabs	M0437M (component #: M0437MVIAL)	NEB M0437M contains T4 RNA Ligase 1 (30 U/μL), T4 RNA Ligase Reaction Buffer (10X), PEG 8000 (1X), and ATP (100 mM); store at -20ºC
T4 RNA Ligase Reaction Buffer (10X)	New England Biolabs	M0437M (component #: B0216SVIAL)	NEB M0437M contains T4 RNA Ligase 1 (30 U/μL), T4 RNA Ligase Reaction Buffer (10X), PEG 8000 (1X), and ATP (100 mM); store at -20ºC
Trizma® base (Tris base)	Sigma-Aldrich	T6066	Prepare a working solution (3 M) and store it at ambient temperature
