# Supplementary material for: Gel-free library preparation for next-generation RNA sequencing and small RNA quantification
Source: Research Square preprint supplement (doi:10.21203/rs.3.rs-7256873/v1), 2025-10-08
Supplement: Supplementary file 9 [file 9919316eb9955ee064329557.xlsx]

## Sheet: Sheet1
tRNA	Biological Replicate A				Biological Replicate B				Biological Replicate C				Mean
	V1	V2	V3	V4	V1	V2	V3	V4	V1	V2	V3	V4	Overall	V1	V2	V3	V4
	D23-12986	D23-12987	D23-12988	D23-12989	D23-12990	D23-12991	D23-12992	D23-12993	D23-12994	D23-12995	D23-12996	D23-12997
Ala-GGC-1	8447.21	9385.87	8518.83	11705.5	9191.12	8234.53	8862.57	9054.84	9641.18	9928.27	9462.08	9883.08	9359.59	9093.17	9182.89	8947.83	10214.5
Ala-TGC-1	8406.69	7180.81	7463.55	5249.12	8543.64	6579.55	8025.15	4560.45	7299.55	5369.37	7732.55	4075.66	6707.17	8083.29	6376.58	7740.42	4628.41
Arg-ACG-1	40031.9	33707.8	37422.8	30512.8	46618.9	40984.3	39042.8	25816.4	45196.6	41486	30420.8	41362.4	37717	43949.1	38726	35628.8	32563.9
Arg-CCG-1	249.701	618.654	179.43	341.287	221.092	497.839	152.012	329.173	201.254	420.432	123.967	326.687	305.127	224.016	512.308	151.803	332.382
Arg-CCT-1	428.193	435.267	721.833	998.431	494.826	659.3	692.599	692.296	596.852	742.088	660.407	946.758	672.404	506.623	612.219	691.613	879.162
Arg-TCT-1	2192.73	2461.36	2041.02	2907.41	2263.56	3202.32	2057.11	2969.2	1844.97	2775.86	1403.46	2998.86	2426.49	2100.42	2813.18	1833.86	2958.49
Asn-GTT-1	21365.6	22629.5	27406.5	34797	18119	24266.3	22314.3	32901	20375	22946.5	26795	24539.6	24871.3	19953.2	23280.7	25505.2	30745.9
Asp-GTC-1	18838.9	18714.3	20724.2	27986.8	17617.2	26203.8	18741.6	23301.2	17246.5	22564	17284.8	23713.4	21078.1	17900.9	22494	18916.8	25000.5
Cys-GCA-1	4310.98	8013.78	3557.21	3470.86	4555.2	4830.38	3795.8	3767.04	4286.79	3809.21	4572.51	2572.26	4295.17	4384.33	5551.13	3975.17	3270.05
fMet-CAT-1	3017.5	1767.58	4851.35	1994.63	3316.38	2583.38	4407.45	1980.2	4187.46	2193.34	4047.34	2134.57	3040.1	3507.11	2181.43	4435.38	2036.47
fMet-CAT-2	1324.17	658.425	1950.93	539.813	1849.45	834.217	2156.95	525.865	2047.95	699.031	2468.83	564.566	1301.68	1740.52	730.558	2192.24	543.414
Gln-CTG-1	9575.79	7417.22	11024.9	11511.8	9561.37	8227.8	10881	10784.1	9592.81	8135.1	13983.5	9150.41	9987.15	9576.66	7926.71	11963.1	10482.1
Gln-TTG-1	10641.1	9098.64	11844.6	13871.9	10208.8	10037.5	12511.8	13997.2	10197.4	9462.25	13209.7	11767.1	11404	10349.1	9532.8	12522	13212.1
Glu-TTC-1	7671.41	10868.4	8852.64	9480.18	6639.79	9021.65	8675.48	9526.08	5909.78	8560.6	6563.5	8601.7	8364.27	6740.32	9483.56	8030.54	9202.66
Gly-CCC-1	793.141	539.113	1110.22	301.581	629.938	497.839	919.268	338.029	511.34	384.974	622.09	298.142	578.807	644.806	473.975	883.861	312.584
Gly-GCC-1	23134.6	31029.9	29451.6	35952.4	22948	26143.3	27157.1	37527.5	20490.8	26363.1	20358.4	29955.3	27542.7	22191.1	27845.4	25655.7	34478.4
Gly-TCC-1	2948.63	4147.19	2920.6	2919.9	1538.87	3457.96	1667.63	3046.69	1113.37	2583.38	709.243	2437.47	2457.58	1866.96	3396.18	1765.83	2801.35
His-GTG-1	10328.2	6915.67	9888.1	6517.01	10816	6532.46	11469.3	8290.95	11297.9	7658.95	13762.6	7640.67	9259.81	10814	7035.69	11706.7	7482.88
Ile-GAT-1	1774.38	18972.8	2099.71	36681.8	1577.48	27192.8	1459.85	36047.7	2055.73	28442.5	1239.67	34923.8	16039	1802.53	24869.4	1599.75	35884.5
Ile2-CAT-1	854.513	5413.23	884.816	2985.03	1084.41	4245.09	742.97	2578.03	793.787	4290.43	540.948	3028.99	2286.85	910.901	4649.58	722.911	2864.02
Ile2-CAT-2	6.55876	26.5138	7.47626	2.67676	10.5282	20.1827	5.39688	2.95222	7.77375	20.2618	3.75658	11.101	10.4316	8.28691	22.3194	5.54324	5.57667
Leu-CAA-1	6522.69	10428.7	6644.53	8657.08	7299.56	9095.65	6759.59	9407.99	8300.64	8856.93	5817.45	8880.81	8055.97	7374.29	9460.44	6407.19	8981.96
Leu-CAG-1	15152.1	8164.03	16244.4	18518.3	17024.1	9808.77	14654.3	16482.3	16876	11022.4	20247.2	16348.6	15045.2	16350.7	9665.07	17048.7	17116.4
Leu-CAG-2	3390.88	2218.32	3042.46	2207.43	3216.37	1406.06	3128.39	1483.12	2758.82	1048.55	3500.38	1240.14	2386.74	3122.02	1557.64	3223.75	1643.57
Leu-GAG-1	1361.65	1752.12	1156.95	1313.4	1263.38	1062.95	904.876	1382.75	907.802	845.929	1175.06	935.657	1171.88	1177.61	1220.33	1078.96	1210.6
Leu-TAA-1	4047.22	16268.4	3359.83	9368.21	3240.93	10373.9	2855.85	9774.44	3558.65	9259.63	3100.68	8240.13	6953.99	3615.6	11967.3	3105.45	9127.59
Leu-TAG-1	3832.66	1975.27	3460.76	1994.18	4220.06	2186.46	3547.55	2665.86	3321.12	2016.05	4120.97	2153.6	2957.88	3791.28	2059.26	3709.76	2271.21
Lys-TTT-1	44553.2	23226.1	33201.3	12400.5	51268.9	33684.9	35953.1	13191.6	46227.1	38345.4	27568.8	19775.7	31616.4	47349.7	31752.1	32241.1	15122.6
Met-CAT-1	19592.2	8674.42	16367.4	2415.77	23030.4	10131.7	17334.8	2704.97	23314.4	8953.17	15535.7	3722.01	12648.1	21979	9253.1	16412.6	2947.59
Phe-GAA-1	12473.8	29600.4	8845.54	3424.47	13879.7	21386.9	8289.6	5021.36	11877.4	22407	6611.59	6850.91	12555.7	12743.6	24464.8	7915.58	5098.91
Phe-GAA-2	2607.34	4750.38	1950.93	544.72	3340.95	3753.98	2054.41	725.878	2905.66	3036.73	2592.04	842.091	2425.43	2951.32	3847.03	2199.13	704.23
Pro-CGG-1	9011.5	4178.13	9936.33	3061.32	12588.2	5368.59	10600.4	3665.55	13718.1	4229.65	16980.5	3101.94	8036.68	11772.6	4592.12	12505.7	3276.27
Pro-GGG-1	1233.52	1380.92	853.789	782.506	1091.42	840.944	782.547	1001.54	996.768	714.228	940.649	878.566	958.117	1107.24	978.699	858.995	887.538
Pro-TGG-1	12865.7	15159.2	13158.6	15453.8	14960.6	15917.4	14489.7	15028.3	15567.4	16526	14917.4	18370.6	15201.2	14464.6	15867.5	14188.6	16284.2
SeC-TCA-1	93.4623	79.5413	197.747	86.5485	92.9991	100.913	154.71	116.982	92.4213	78.5144	195.342	128.455	118.136	92.9609	86.323	182.6	110.662
Ser-CGA-1	407.58	609.816	408.952	509.922	270.224	248.92	332.807	359.064	277.264	253.272	343.352	317.172	361.529	318.356	370.669	361.704	395.386
Ser-GCT-1	1689.35	936.819	1535.62	1285.29	989.651	511.294	1091.97	797.838	765.283	367.245	589.784	453.556	917.808	1148.09	605.119	1072.46	845.561
Ser-GGA-1	3974.84	2940.82	4773.59	7702.82	2839.11	3397.42	4031.47	5468.25	2826.19	2940.49	2871.53	4453.09	4018.3	3213.38	3092.91	3892.2	5874.72
Ser-TGA-1	253.683	433.058	337.553	488.508	317.601	511.294	365.189	458.333	314.405	412.834	302.029	352.061	378.879	295.23	452.395	334.924	432.967
Thr-CGT-1	1805.3	1807.35	2663.42	699.972	2256.55	2072.09	2989.87	889.726	2567.93	1955.26	2855	1360.67	1993.59	2209.92	1944.9	2836.1	983.455
Thr-CGT-2	664.309	691.567	541.281	96.3633	859.803	766.941	919.268	191.156	670.27	468.554	1053.35	126.869	587.477	731.461	642.354	837.965	138.129
Thr-GGT-1	6095.43	6637.28	7155.16	8782.44	8608.56	8402.72	8509.07	9743.07	8313.6	9750.98	9006.79	10025.8	8419.24	7672.53	8263.66	8223.67	9517.11
Thr-GGT-2	2482.49	2350.89	2369.23	1822.87	4174.43	2072.09	3412.62	2086.85	3206.24	2097.09	4145.77	2416.85	2719.79	3287.72	2173.36	3309.21	2108.86
Thr-TGT-1	7345.58	8208.22	8728.16	5996.83	9524.52	10178.8	10020.2	6866.87	8786.07	10381.6	8687.48	10182.8	8742.26	8552.05	9589.55	9145.28	7682.17
Trp-CCA-1	7688.74	15967.9	7582.42	9748.31	8036.53	10602.6	7442.29	8036.69	7732.29	9087.41	7933.91	7233.11	8924.35	7819.19	11886	7652.87	8339.37
Tyr-GTA-1	7704.43	9668.68	6780.6	6491.14	7108.29	7460.86	7346.95	7369.49	7478.35	7466.47	5956.44	7859.52	7390.93	7430.36	8198.67	6694.66	7240.05
Tyr-GTA-2	7411.16	9306.33	6747.7	6013.78	6360.79	6741.01	6937.68	7015.59	6913.46	6924.46	5871.54	7015.84	6938.28	6895.14	7657.27	6518.97	6681.74
Val-GAC-1	833.431	3760.53	846.687	3461.05	752.767	3861.62	685.403	3761.5	792.059	4449.99	603.307	4310.37	2343.23	792.752	4024.05	711.799	3844.3
Val-GAC-2	6206.46	3466.67	4921.62	3849.18	7961.08	4507.46	5112.64	4233.49	7917.14	4946.41	6031.57	5125.5	5356.6	7361.56	4306.85	5355.28	4402.72
Val-TAC-1	14028.5	13254.7	18017.8	17402	17780.4	16792	22046.2	19128.9	20396.6	20294.7	23047.4	22328.9	18709.8	17401.8	16780.4	21037.1	19620

## Sheet: Sheet3
tRNA	Biological Replicate A				Biological Replicate B				Biological Replicate C
	V1	V2	V3	V4	V1	V2	V3	V4	V1	V2	V3	V4
	D23-12986	D23-12987	D23-12988	D23-12989	D23-12990	D23-12991	D23-12992	D23-12993	D23-12994	D23-12995	D23-12996	D23-12997
Ala-GGC-1	13.0558	13.1955	13.067	13.4884	13.1677	13.0226	13.1194	13.1479	13.2311	13.2699	13.2062	13.2639
Ala-TGC-1	13.0082	12.7988	12.8502	12.3836	13.0294	12.6829	12.9464	12.1975	12.8206	12.414	12.8971	12.0496
Arg-ACG-1	15.2803	15.0523	15.1909	14.9203	15.4826	15.3115	15.2471	14.6991	15.4415	15.3277	14.9163	15.3237
Arg-CCG-1	7.97597	9.16093	7.54476	8.38647	7.82336	8.84846	7.33926	8.33913	7.69786	8.651	7.0779	8.32596
Arg-CCT-1	8.79426	8.8247	9.4831	9.91242	8.98882	9.36285	9.42824	9.42789	9.2324	9.51782	9.36556	9.83975
Arg-TCT-1	11.1074	11.2604	11.0125	11.4814	11.1497	11.6067	11.0231	11.5093	10.8793	11.4194	10.5184	11.522
Asn-GTT-1	14.3988	14.475	14.7291	15.0462	14.1806	14.5676	14.4564	14.9718	14.3359	14.4934	14.6991	14.5824
Asp-GTC-1	14.213	14.2043	14.3395	14.7384	14.1242	14.6506	14.2062	14.495	14.096	14.4523	14.0989	14.5183
Cys-GCA-1	12.0693	12.8924	11.8146	11.7821	12.1422	12.2192	11.9006	11.8905	12.0618	11.9055	12.1473	11.387
fMet-CAT-1	11.5532	10.8481	12.1837	11.0053	11.6781	11.3486	12.0559	10.9956	11.9879	11.1321	11.9427	11.0957
fMet-CAT-2	10.3496	9.43368	10.8639	9.16606	10.791	9.74879	10.9966	9.13121	10.9277	9.51232	11.1765	9.2315
Gln-CTG-1	13.2284	12.8904	13.4154	13.4728	13.2265	13.0281	13.3979	13.3861	13.2308	13.0126	13.7311	13.1683
Gln-TTG-1	13.3843	13.177	13.5264	13.7361	13.3294	13.3072	13.5991	13.748	13.3278	13.2289	13.6711	13.5176
Glu-TTC-1	12.9137	13.3758	13.1037	13.1946	12.7226	13.1284	13.0768	13.201	12.5685	13.0591	12.7072	13.0655
Gly-CCC-1	9.58383	9.07281	10.0297	8.31039	9.2768	8.97207	9.77756	8.45905	9.00344	8.63847	9.26158	8.30607
Gly-GCC-1	14.516	14.9055	14.8362	15.1011	14.5053	14.6782	14.7286	15.1581	14.3554	14.6892	14.3468	14.8587
Gly-TCC-1	11.4928	11.9447	11.48	11.4797	10.6331	11.7003	10.7381	11.5362	10.2061	11.3166	9.61562	11.2399
His-GTG-1	13.3184	12.787	13.2606	12.7082	13.3795	12.7128	13.4575	13.0269	13.4375	12.9221	13.6997	12.9188
Ile-GAT-1	10.9638	14.1008	11.1853	14.9827	10.8167	14.5805	10.7117	14.9593	11.1589	14.6417	10.4979	14.9166
Ile2-CAT-1	9.82317	12.2705	9.86958	11.4792	10.1405	11.9413	9.64276	11.2844	9.72912	11.96	9.22793	11.4975
Ile2-CAT-2	2.79232	4.04477	2.92732	2.14683	3.18922	3.42495	2.69472	2.16731	2.96751	3.71532	2.44554	3.2411
Leu-CAA-1	12.6943	13.3166	12.7189	13.0696	12.8435	13.1347	12.7417	13.18	13.0138	13.0998	12.543	13.1034
Leu-CAG-1	13.8828	13.0648	13.9752	14.1492	14.0374	13.308	13.8385	13.9945	14.0258	13.4614	14.2677	13.9836
Leu-CAG-2	11.678	11.1148	11.5339	11.1083	11.6069	10.5219	11.5706	10.5823	11.4038	10.1328	11.7199	10.3491
Leu-GAG-1	10.3909	10.723	10.1751	10.3429	10.291	10.0652	9.85099	10.4112	9.85519	9.76527	10.1956	9.89576
Leu-TAA-1	12.0266	13.8747	11.7807	13.1399	11.7344	13.2739	11.5669	13.1964	11.857	13.1239	11.6751	12.9691
Leu-TAG-1	11.8694	10.9928	11.7338	11.0038	11.9966	11.1291	11.7665	11.3878	11.679	11.0199	11.9655	11.1061
Lys-TTT-1	15.3938	14.5292	15.0029	13.6997	15.5805	15.022	15.1087	13.7812	15.4428	15.1942	14.7563	14.3163
Met-CAT-1	14.1809	13.0984	13.9414	11.413	14.3961	13.3041	14.0177	11.5611	14.4126	13.1403	13.872	11.9822
Phe-GAA-1	13.5861	14.7364	13.1302	11.8779	13.7278	14.3022	13.0443	12.3817	13.5211	14.365	12.7451	12.7924
Phe-GAA-2	11.3191	12.1153	10.9345	9.25651	11.6474	11.7983	11.003	9.63118	11.4626	11.5201	11.3111	9.83229
Pro-CGG-1	13.1047	12.0872	13.2345	11.6758	13.5489	12.4191	13.3204	11.9132	13.6636	12.1035	13.948	11.6945
Pro-GGG-1	10.2366	10.3836	9.74957	9.63454	10.0734	9.73367	9.63514	9.96058	9.95412	9.51815	9.87762	9.78783
Pro-TGG-1	13.6703	13.8878	13.7001	13.9133	13.8703	13.9524	13.8279	13.8763	13.923	14.0022	13.8664	14.1427
SeC-TCA-1	6.57458	6.40436	7.54817	6.47861	6.58243	6.70163	7.22271	6.86497	6.56648	6.39519	7.52709	6.98049
Ser-CGA-1	8.65185	9.17539	8.65602	8.94697	8.11799	8.0425	8.38526	8.48471	8.14734	8.03992	8.42597	8.32348
Ser-GCT-1	10.6399	9.8562	10.5128	10.2764	9.92877	9.08681	10.0597	9.64499	9.59022	8.64761	9.2475	8.90907
Ser-GGA-1	11.9522	11.5539	12.1951	12.8314	11.5072	11.7452	11.9709	12.3756	11.5008	11.5539	11.5217	12.1027
Ser-TGA-1	8.03561	8.73564	8.41094	8.89762	8.33419	8.93892	8.51449	8.81368	8.31892	8.67308	8.26624	8.46711
Thr-CGT-1	10.8202	10.8218	11.3359	9.57165	11.1153	11.001	11.4891	9.88612	11.2871	10.9255	11.4279	10.4475
Thr-CGT-2	9.33499	9.3829	9.06379	6.82899	9.67179	9.50544	9.76344	7.69989	9.3452	8.87358	9.94479	7.22887
Thr-GGT-1	12.6104	12.7234	12.8226	13.0943	13.0677	13.0356	13.0523	13.232	13.0215	13.2329	13.1277	13.2699
Thr-GGT-2	11.284	11.2123	11.2221	10.8756	11.9729	11.0484	11.7058	11.0542	11.623	11.0618	11.9643	11.2487
Thr-TGT-1	12.8615	13.0087	13.0901	12.5931	13.2059	13.2936	13.2732	12.7723	13.0989	13.3201	13.0839	13.2946
Trp-CCA-1	12.9229	13.8934	12.9045	13.2377	12.9816	13.3486	12.8798	12.9816	12.9304	13.1445	12.9645	12.8421
Tyr-GTA-1	12.9059	13.2071	12.7365	12.6787	12.7991	12.8632	12.8429	12.8469	12.8664	12.8643	12.5649	12.9323
Tyr-GTA-2	12.8471	13.1491	12.7227	12.5701	12.6445	12.7215	12.7595	12.7743	12.7549	12.757	12.5384	12.7743
Val-GAC-1	9.79083	11.7852	9.81218	11.6766	9.66503	11.8158	9.53802	11.7875	9.72684	12.0092	9.37054	11.9677
Val-GAC-2	12.5789	11.8086	12.2712	11.9458	12.9093	12.1557	12.3217	12.0717	12.9022	12.278	12.5409	12.325
Val-TAC-1	13.8083	13.7335	14.14	14.0938	14.1224	14.0467	14.4077	14.2193	14.3045	14.2978	14.4667	14.4246

## Sheet: Sheet4
	PF Mitigation Approach (SS vs ALKB)			PD Mitigation Approach (EXOI vs GE)			Interaction (SS/ALKB [EXOI] vs SS/ALKB [GE])
tRNA	Fold Change	Log2 Fold Change	Adjusted P-Value	Fold Change	Log2 Fold Change	Adjusted P-Value	Fold Change	Log2 Fold Change	Adjusted P-Value
Ala-GGC-1	1.00806	0.0115837	0.933452	0.985879	-0.0205181	0.880862	1.10883	0.149041	0.6656
Ala-TGC-1	0.794527	-0.331832	0.0162586	0.978932	-0.0307189	0.778441	0.781203	-0.356231	0.100976
Arg-ACG-1	0.887814	-0.17167	0.428416	0.891117	-0.166313	0.273087	1.02086	0.0297857	0.929815
Arg-CCG-1	2.23939	1.1631	1.34393e-12	0.715209	-0.483563	0.00521513	0.968926	-0.0455412	0.903413
Arg-CCT-1	1.17943	0.238094	0.315786	1.24072	0.311173	0.10443	1.03925	0.0555471	0.903413
Arg-TCT-1	1.32479	0.405764	0.0162586	0.924362	-0.11347	0.396297	1.1689	0.225154	0.432474
Asn-GTT-1	1.16075	0.215053	0.229472	1.19457	0.25649	0.104632	1.02219	0.0316643	0.92935
Asp-GTC-1	1.24434	0.315385	0.0579109	1.03117	0.0442801	0.769387	1.04064	0.0574691	0.903413
Cys-GCA-1	1.21218	0.277601	0.267997	0.966955	-0.0484792	0.757957	0.730381	-0.453279	0.160546
fMet-CAT-1	0.629517	-0.667683	0.000181014	1.17859	0.237067	0.12324	0.783217	-0.352516	0.167112
fMet-CAT-2	0.429759	-1.2184	1.30901e-13	1.19367	0.255403	0.104632	0.628299	-0.670478	0.00478939
Gln-CTG-1	0.834367	-0.261246	0.110801	1.17159	0.228472	0.117751	1.05007	0.0704805	0.903413
Gln-TTG-1	0.922742	-0.116001	0.428416	1.16134	0.215785	0.106642	1.12502	0.169951	0.524247
Glu-TTC-1	1.39673	0.482052	0.000181014	1.14124	0.190606	0.12324	0.83922	-0.25288	0.223117
Gly-CCC-1	0.74814	-0.418621	0.0224219	1.26253	0.336322	0.0592653	0.521109	-0.940343	0.000193232
Gly-GCC-1	1.24613	0.317455	0.0224219	1.10074	0.138477	0.294754	1.05669	0.0795483	0.850354
Gly-TCC-1	1.84467	0.883361	0.000509433	0.968525	-0.0461389	0.757957	0.965467	-0.0507007	0.903413
His-GTG-1	0.654623	-0.611263	1.70565e-05	1.0477	0.0672288	0.625354	0.994435	-0.00805097	0.935091
Ile-GAT-1	13.624	3.76808	1.70786e-68	0.951625	-0.0715344	0.625354	1.464	0.549914	0.0798609
Ile2-CAT-1	5.02322	2.32861	6.5017e-37	0.863309	-0.212051	0.16525	0.831181	-0.266765	0.386214
Ile2-CAT-2	2.49819	1.32088	0.00403944	0.969331	-0.044939	0.625354	0.369286	-1.43719	0.0233275
Leu-CAA-1	1.27103	0.345992	0.0224219	0.909135	-0.137434	0.33834	1.07808	0.108461	0.850354
Leu-CAG-1	0.598603	-0.740329	2.5876e-06	1.02116	0.0302139	0.811146	1.63236	0.706956	0.00218866
Leu-CAG-2	0.49901	-1.00286	2.5876e-06	1.02176	0.0310557	0.811146	1.00969	0.0139111	0.956825
Leu-GAG-1	1.01864	0.0266374	0.906405	0.972119	-0.0407951	0.778441	1.0526	0.0739624	0.903413
Leu-TAA-1	3.19782	1.67709	2.64994e-23	0.924419	-0.113381	0.396297	0.926075	-0.110799	0.850354
Leu-TAG-1	0.553054	-0.854508	2.06251e-08	0.993223	-0.00980995	0.880862	1.09483	0.130707	0.764523
Lys-TTT-1	0.67763	-0.561431	0.00580673	0.757278	-0.401105	0.0592653	0.756326	-0.40292	0.160546
Met-CAT-1	0.429586	-1.21898	2.60735e-14	0.803064	-0.316414	0.0592653	0.442592	-1.17595	2.41583e-07
Phe-GAA-1	1.84715	0.885299	0.000162072	0.699464	-0.515679	0.0383669	0.365183	-1.45331	1.44373e-05
Phe-GAA-2	1.29003	0.367409	0.094284	0.841774	-0.248495	0.12324	0.255549	-1.96833	1.0887e-10
Pro-CGG-1	0.405812	-1.30112	2.14405e-11	1.02629	0.0374412	0.778441	0.729838	-0.454352	0.120273
Pro-GGG-1	0.889254	-0.169332	0.434605	0.880394	-0.183779	0.22789	1.12191	0.165956	0.750935
Pro-TGG-1	1.09695	0.133494	0.327258	0.987772	-0.0177496	0.880862	1.03675	0.052068	0.903413
SeC-TCA-1	0.906461	-0.141684	0.558867	1.86343	0.897964	3.69153e-05	0.741899	-0.430705	0.160546
Ser-CGA-1	1.12799	0.173752	0.428416	1.07583	0.10545	0.490515	0.957842	-0.0621405	0.903413
Ser-GCT-1	0.530702	-0.914026	1.04166e-08	0.948613	-0.076108	0.621417	1.42616	0.512133	0.0284004
Ser-GGA-1	0.976042	-0.0349842	0.897587	1.11378	0.155464	0.294754	1.42447	0.510426	0.0471847
Ser-TGA-1	1.49577	0.580888	0.00144639	1.07634	0.106139	0.490515	0.881421	-0.182097	0.635163
Thr-CGT-1	0.897017	-0.156792	0.428416	1.1964	0.258697	0.1106	0.397993	-1.32918	2.41583e-07
Thr-CGT-2	0.897367	-0.15623	0.508978	1.05474	0.0768922	0.625354	0.195483	-2.35489	1.50029e-11
Thr-GGT-1	1.07447	0.103622	0.446908	1.04663	0.0657527	0.621417	1.06792	0.0947969	0.850354
Thr-GGT-2	0.696641	-0.521512	0.0103467	1.00365	0.00525708	0.986263	0.962815	-0.0546695	0.903413
Thr-TGT-1	1.11302	0.154474	0.428416	1.04117	0.0582089	0.71609	0.778039	-0.362085	0.160546
Trp-CCA-1	1.42744	0.513428	0.00241557	0.989716	-0.0149131	0.880862	0.76921	-0.37855	0.160546
Tyr-GTA-1	1.09661	0.133051	0.434605	0.939877	-0.0894564	0.580128	0.987157	-0.0186479	0.935091
Tyr-GTA-2	1.10161	0.139617	0.428416	0.969343	-0.0449215	0.769387	0.943343	-0.0841453	0.903413
Val-GAC-1	5.00485	2.32333	8.05865e-45	0.940282	-0.0888339	0.601471	1.04845	0.0682608	0.903413
Val-GAC-2	0.588111	-0.76584	1.69075e-09	0.756752	-0.402107	0.00482001	1.36241	0.44616	0.0233275
Val-TAC-1	0.963085	-0.0542643	0.667173	1.1729	0.230077	0.0852589	0.973566	-0.0386493	0.903413
