# Supplementary material for: Gel-free library preparation for next-generation RNA sequencing and small RNA quantification
Source: Research Square preprint supplement (doi:10.21203/rs.3.rs-7256873/v1), 2025-10-08
Supplement: Supplementary file 10 [file c66b84f9d71ccc4a18e06538.xlsx]

## Sheet: Sheet1
Protocol	tRNA	Number of Samples	Proportion of Full-Length Reads
			Mean	Median	Standard Deviation	Standard Error
V1	Ala-GGC-1	3	0.429046	0.397673	0.0761079	0.0439409
V1	Ala-TGC-1	3	0.0316483	0.0302413	0.00778679	0.00449571
V1	Arg-ACG-1	3	0.00355303	0.00401368	0.00149481	0.000863032
V1	Arg-CCG-1	3	0.00063012	0	0.0010914	0.00063012
V1	Arg-CCT-1	3	0.232408	0.171225	0.128993	0.0744744
V1	Arg-TCT-1	3	0.0528478	0.0643192	0.0308299	0.0177996
V1	Asn-GTT-1	3	0.250244	0.207264	0.0771747	0.0445568
V1	Asp-GTC-1	3	0.415501	0.3751	0.0855312	0.0493815
V1	Cys-GCA-1	3	0.00367193	0.00362684	0.000544217	0.000314204
V1	Gln-CTG-1	3	0.365429	0.321028	0.103296	0.0596379
V1	Gln-TTG-1	3	0.281005	0.253698	0.0759452	0.043847
V1	Glu-TTC-1	3	0.0673553	0.0680715	0.0141567	0.00817338
V1	Gly-CCC-1	3	0.0452924	0.0457903	0.0078931	0.00455708
V1	Gly-GCC-1	3	0.328179	0.352994	0.0564499	0.0325914
V1	Gly-TCC-1	3	0.32275	0.341781	0.0524916	0.030306
V1	His-GTG-1	3	0.282792	0.249554	0.0715241	0.0412944
V1	Ile-GAT-1	3	0.0013084	0.00168067	0.00116765	0.000674144
V1	Ile2-CAT-1	3	0.000730994	0	0.00126612	0.000730994
V1	Ile2-CAT-2	3	0	0	0	0
V1	Leu-CAA-1	3	0.00147038	0.00144231	0.000133892	7.73027e-05
V1	Leu-CAG-1	3	0.0566457	0.0430565	0.0244443	0.0141129
V1	Leu-CAG-2	3	0.0260248	0.0214559	0.0118497	0.00684144
V1	Leu-GAG-1	3	0.00334091	0.00292498	0.00218981	0.00126429
V1	Leu-TAA-1	3	0.00153346	0.00138905	0.00107157	0.000618668
V1	Leu-TAG-1	3	0.043257	0.0416819	0.011692	0.00675036
V1	Lys-TTT-1	3	0.0202345	0.0161953	0.00702768	0.00405743
V1	Met-CAT-1	3	0.000302639	0.000310886	0.000146285	8.44578e-05
V1	Phe-GAA-1	3	0.000186149	0.000146832	8.49096e-05	4.90226e-05
V1	Phe-GAA-2	3	0.00305761	0.00277008	0.000566827	0.000327258
V1	Pro-CGG-1	3	0.00589699	0.00470827	0.00215059	0.00124165
V1	Pro-GGG-1	3	0.0134351	0.013901	0.00354774	0.00204829
V1	Pro-TGG-1	3	0.255729	0.268132	0.0254339	0.0146842
V1	SeC-TCA-1	3	0	0	0	0
V1	Ser-CGA-1	3	0.0143371	0.0178263	0.00680655	0.00392976
V1	Ser-GCT-1	3	0.0217806	0.0147591	0.012596	0.00727232
V1	Ser-GGA-1	3	0.232256	0.183901	0.107154	0.0618654
V1	Ser-TGA-1	3	0.00551734	0.00824176	0.00477828	0.00275874
V1	Thr-CGT-1	3	0.417138	0.393399	0.0436233	0.0251859
V1	Thr-CGT-2	3	0	0	0	0
V1	Thr-GGT-1	3	0.363205	0.347204	0.100441	0.0579894
V1	Thr-GGT-2	3	0.0722463	0.0762688	0.0262751	0.01517
V1	Thr-TGT-1	3	0.25725	0.26443	0.0917484	0.0529709
V1	Trp-CCA-1	3	0.0114035	0.0117292	0.00360805	0.00208311
V1	Tyr-GTA-1	3	0.00268704	0.00312431	0.00197303	0.00113913
V1	Tyr-GTA-2	3	0.0027465	0.00239362	0.000877665	0.00050672
V1	Val-GAC-1	3	0.00610327	0.00663717	0.00136996	0.000790945
V1	Val-GAC-2	3	0.0501503	0.0434879	0.0125897	0.00726865
V1	Val-TAC-1	3	0.391375	0.356455	0.0708038	0.0408786
V1	fMet-CAT-1	3	0.0222126	0.0220404	0.00531201	0.00306689
V1	fMet-CAT-2	3	0.0191288	0.0172216	0.0038323	0.00221258
V2	Ala-GGC-1	3	0.744596	0.705104	0.0749109	0.0432499
V2	Ala-TGC-1	3	0.165518	0.169421	0.0243468	0.0140566
V2	Arg-ACG-1	3	0.72443	0.72245	0.0834274	0.0481668
V2	Arg-CCG-1	3	0.0548598	0.0583942	0.025877	0.0149401
V2	Arg-CCT-1	3	0.685945	0.734694	0.140161	0.0809219
V2	Arg-TCT-1	3	0.663524	0.71097	0.126856	0.0732401
V2	Asn-GTT-1	3	0.603529	0.65567	0.13558	0.0782771
V2	Asp-GTC-1	3	0.77864	0.810783	0.110563	0.0638335
V2	Cys-GCA-1	3	0.0118822	0.0111421	0.00376025	0.00217098
V2	Gln-CTG-1	3	0.697581	0.692434	0.0958295	0.0553272
V2	Gln-TTG-1	3	0.705094	0.717845	0.104761	0.0604836
V2	Glu-TTC-1	3	0.28805	0.287845	0.0340368	0.0196512
V2	Gly-CCC-1	3	0.298053	0.256757	0.0960962	0.0554812
V2	Gly-GCC-1	3	0.659151	0.623263	0.0790988	0.0456677
V2	Gly-TCC-1	3	0.846518	0.848249	0.0465288	0.0268634
V2	His-GTG-1	3	0.57337	0.564367	0.101661	0.0586939
V2	Ile-GAT-1	3	0.00244758	0.00197974	0.000810782	0.000468105
V2	Ile2-CAT-1	3	0.0274367	0.0333333	0.0110245	0.00636498
V2	Ile2-CAT-2	3	0	0	0	0
V2	Leu-CAA-1	3	0.0629746	0.0613905	0.0343449	0.019829
V2	Leu-CAG-1	3	0.614404	0.705795	0.212942	0.122942
V2	Leu-CAG-2	3	0.323385	0.412371	0.191468	0.110544
V2	Leu-GAG-1	3	0.163476	0.120253	0.128853	0.0743934
V2	Leu-TAA-1	3	0.0354228	0.039559	0.0292289	0.0168753
V2	Leu-TAG-1	3	0.334929	0.350769	0.129749	0.0749106
V2	Lys-TTT-1	3	0.69221	0.710947	0.0899687	0.0519435
V2	Met-CAT-1	3	0.156632	0.168106	0.0524329	0.0302722
V2	Phe-GAA-1	3	0.0481052	0.0440472	0.0131849	0.00761232
V2	Phe-GAA-2	3	0.0631915	0.0584795	0.0220988	0.0127587
V2	Pro-CGG-1	3	0.13893	0.126884	0.0371075	0.021424
V2	Pro-GGG-1	3	0.192559	0.17817	0.0638845	0.0368837
V2	Pro-TGG-1	3	0.736787	0.721235	0.0601228	0.0347119
V2	SeC-TCA-1	3	0	0	0	0
V2	Ser-CGA-1	3	0.0700222	0.0810811	0.0367762	0.0212327
V2	Ser-GCT-1	3	0.127732	0.131579	0.0880471	0.050834
V2	Ser-GGA-1	3	0.595834	0.645545	0.190201	0.109813
V2	Ser-TGA-1	3	0.119848	0.131579	0.0890533	0.051415
V2	Thr-CGT-1	3	0.629244	0.650943	0.0999742	0.0577201
V2	Thr-CGT-2	3	0	0	0	0
V2	Thr-GGT-1	3	0.779168	0.792634	0.0831539	0.0480089
V2	Thr-GGT-2	3	0.38117	0.405844	0.0990377	0.0571794
V2	Thr-TGT-1	3	0.641751	0.660939	0.103752	0.0599012
V2	Trp-CCA-1	3	0.101942	0.0970812	0.0446564	0.0257824
V2	Tyr-GTA-1	3	0.0837494	0.084058	0.0443661	0.0256148
V2	Tyr-GTA-2	3	0.077459	0.0775862	0.0438284	0.0253044
V2	Val-GAC-1	3	0.00662074	0.00652045	0.00381962	0.00220526
V2	Val-GAC-2	3	0.698723	0.699102	0.104443	0.0603001
V2	Val-TAC-1	3	0.736086	0.736378	0.095334	0.0550411
V2	fMet-CAT-1	3	0.087828	0.0914286	0.0127602	0.00736708
V2	fMet-CAT-2	3	0.110734	0.0982143	0.0400573	0.0231271
V3	Ala-GGC-1	3	0.500618	0.529518	0.0814348	0.0470164
V3	Ala-TGC-1	3	0.0426536	0.0403904	0.00728338	0.00420506
V3	Arg-ACG-1	3	0.00523622	0.00453886	0.0035375	0.00204238
V3	Arg-CCG-1	3	0.00069735	0	0.00120785	0.00069735
V3	Arg-CCT-1	3	0.347193	0.365188	0.0710938	0.041046
V3	Arg-TCT-1	3	0.0874442	0.070279	0.0425667	0.0245759
V3	Asn-GTT-1	3	0.322962	0.297473	0.0546069	0.0315273
V3	Asp-GTC-1	3	0.517575	0.55073	0.060659	0.0350215
V3	Cys-GCA-1	3	0.00567009	0.00402844	0.00291732	0.00168431
V3	Gln-CTG-1	3	0.433817	0.4583	0.0810267	0.0467808
V3	Gln-TTG-1	3	0.410206	0.435958	0.0588191	0.0339592
V3	Glu-TTC-1	3	0.0726144	0.0776729	0.0253554	0.0146389
V3	Gly-CCC-1	3	0.0498747	0.0479452	0.0183071	0.0105696
V3	Gly-GCC-1	3	0.406244	0.348791	0.107824	0.0622523
V3	Gly-TCC-1	3	0.406765	0.356992	0.0889618	0.0513621
V3	His-GTG-1	3	0.368739	0.354479	0.0481458	0.027797
V3	Ile-GAT-1	3	0.00156228	0.00123229	0.00115707	0.000668032
V3	Ile2-CAT-1	3	0.000812018	0	0.00140646	0.000812018
V3	Ile2-CAT-2	3	0	0	0	0
V3	Leu-CAA-1	3	0.00403127	0.00385895	0.00308771	0.00178269
V3	Leu-CAG-1	3	0.126913	0.147374	0.0544926	0.0314613
V3	Leu-CAG-2	3	0.0561999	0.0532566	0.03419	0.0197396
V3	Leu-GAG-1	3	0.0070537	0.00695825	0.00582324	0.00336205
V3	Leu-TAA-1	3	0.00621828	0.00818898	0.00414659	0.00239404
V3	Leu-TAG-1	3	0.0969299	0.0999239	0.0650379	0.0375497
V3	Lys-TTT-1	3	0.0365679	0.0369886	0.00816387	0.00471341
V3	Met-CAT-1	3	0.000638659	0.000674554	0.000476644	0.000275191
V3	Phe-GAA-1	3	0.000476724	0.00046184	0.000154562	8.92364e-05
V3	Phe-GAA-2	3	0.00778924	0.00695733	0.0025698	0.00148368
V3	Pro-CGG-1	3	0.00630187	0.00831765	0.00417201	0.00240871
V3	Pro-GGG-1	3	0.0303996	0.0369089	0.0184357	0.0106438
V3	Pro-TGG-1	3	0.29461	0.363219	0.144159	0.0832305
V3	SeC-TCA-1	3	0	0	0	0
V3	Ser-CGA-1	3	0.0442443	0.0405405	0.0200956	0.0116022
V3	Ser-GCT-1	3	0.0468448	0.0438017	0.01791	0.0103404
V3	Ser-GGA-1	3	0.384919	0.367967	0.0426414	0.024619
V3	Ser-TGA-1	3	0.0126944	0.00985222	0.00946596	0.00546517
V3	Thr-CGT-1	3	0.476885	0.441447	0.0629131	0.0363229
V3	Thr-CGT-2	3	0	0	0	0
V3	Thr-GGT-1	3	0.396236	0.391754	0.0890631	0.0514206
V3	Thr-GGT-2	3	0.084268	0.0643933	0.0402839	0.0232579
V3	Thr-TGT-1	3	0.310008	0.268426	0.105331	0.0608131
V3	Trp-CCA-1	3	0.0186604	0.0126904	0.0110028	0.0063525
V3	Tyr-GTA-1	3	0.00734404	0.00505902	0.00602174	0.00347666
V3	Tyr-GTA-2	3	0.00841346	0.00716846	0.00548881	0.00316897
V3	Val-GAC-1	3	0.00423568	0.00265252	0.0028614	0.00165203
V3	Val-GAC-2	3	0.0830378	0.0784387	0.0100503	0.00580257
V3	Val-TAC-1	3	0.496714	0.511691	0.0818954	0.0472823
V3	fMet-CAT-1	3	0.020805	0.0220321	0.00627332	0.0036219
V3	fMet-CAT-2	3	0.0192705	0.0179949	0.003093	0.00178575
V4	Ala-GGC-1	3	0.80807	0.842119	0.10484	0.0605292
V4	Ala-TGC-1	3	0.17751	0.202961	0.0483227	0.0278991
V4	Arg-ACG-1	3	0.790374	0.784916	0.0723563	0.0417749
V4	Arg-CCG-1	3	0.0728634	0.0684624	0.0175871	0.0101539
V4	Arg-CCT-1	3	0.812018	0.818507	0.0475068	0.027428
V4	Arg-TCT-1	3	0.736916	0.726631	0.0488196	0.028186
V4	Asn-GTT-1	3	0.731678	0.748365	0.07317	0.0422447
V4	Asp-GTC-1	3	0.854288	0.872551	0.0619979	0.0357945
V4	Cys-GCA-1	3	0.0141649	0.0146944	0.00646141	0.0037305
V4	Gln-CTG-1	3	0.792267	0.874724	0.156001	0.090067
V4	Gln-TTG-1	3	0.816949	0.863737	0.097556	0.056324
V4	Glu-TTC-1	3	0.297609	0.288061	0.024984	0.0144245
V4	Gly-CCC-1	3	0.467025	0.451852	0.0484794	0.0279896
V4	Gly-GCC-1	3	0.80235	0.796394	0.0340189	0.0196408
V4	Gly-TCC-1	3	0.869206	0.853059	0.0530296	0.0306166
V4	His-GTG-1	3	0.765674	0.755323	0.0637054	0.0367803
V4	Ile-GAT-1	3	0.00184255	0.00177103	0.000164834	9.51672e-05
V4	Ile2-CAT-1	3	0.0455412	0.0439659	0.00567024	0.00327371
V4	Ile2-CAT-2	3	0	0	0	0
V4	Leu-CAA-1	3	0.132503	0.114193	0.033285	0.0192171
V4	Leu-CAG-1	3	0.708989	0.72235	0.133432	0.0770369
V4	Leu-CAG-2	3	0.529486	0.52425	0.126592	0.0730877
V4	Leu-GAG-1	3	0.350072	0.285326	0.119643	0.0690761
V4	Leu-TAA-1	3	0.0862468	0.0735833	0.0221446	0.0127852
V4	Leu-TAG-1	3	0.431249	0.365324	0.141351	0.0816093
V4	Lys-TTT-1	3	0.682747	0.675913	0.0272369	0.0157252
V4	Met-CAT-1	3	0.148407	0.141376	0.0269498	0.0155595
V4	Phe-GAA-1	3	0.239458	0.238317	0.00391987	0.00226314
V4	Phe-GAA-2	3	0.399625	0.397661	0.00448936	0.00259193
V4	Pro-CGG-1	3	0.213788	0.213076	0.0322763	0.0186347
V4	Pro-GGG-1	3	0.25637	0.243444	0.0755454	0.0436162
V4	Pro-TGG-1	3	0.782327	0.78097	0.0760832	0.0439267
V4	SeC-TCA-1	3	0	0	0	0
V4	Ser-CGA-1	3	0.20954	0.205	0.0169979	0.00981377
V4	Ser-GCT-1	3	0.217826	0.191947	0.0767746	0.0443258
V4	Ser-GGA-1	3	0.787774	0.805387	0.0968849	0.0559365
V4	Ser-TGA-1	3	0.398238	0.405405	0.0342232	0.0197588
V4	Thr-CGT-1	3	0.595022	0.536415	0.118226	0.0682578
V4	Thr-CGT-2	3	0	0	0	0
V4	Thr-GGT-1	3	0.812727	0.805232	0.0479129	0.0276625
V4	Thr-GGT-2	3	0.37966	0.343186	0.0800373	0.0462095
V4	Thr-TGT-1	3	0.716977	0.677256	0.0924165	0.0533567
V4	Trp-CCA-1	3	0.218977	0.221876	0.0134113	0.00774302
V4	Tyr-GTA-1	3	0.207883	0.186032	0.0381194	0.0220083
V4	Tyr-GTA-2	3	0.210369	0.192916	0.0357023	0.0206127
V4	Val-GAC-1	3	0.00712046	0.00696762	0.00127213	0.000734464
V4	Val-GAC-2	3	0.793253	0.777765	0.052794	0.0304806
V4	Val-TAC-1	3	0.789011	0.769568	0.0627314	0.036218
V4	fMet-CAT-1	3	0.0825328	0.0823422	0.0239173	0.0138087
V4	fMet-CAT-2	3	0.0967118	0.0879713	0.035536	0.0205167

## Sheet: Sheet2
	Degree of Freedom	Sum of Squares	Mean Sum of Squares	F-Statistic	P-Value
Biological Replicate	2	0.3278	0.1639	49.113	< 0.001	***
PF Mitigation Approach	1	10.2796	10.2796	3080.26	< 0.001	***
PD Mitigation Approach	1	0.4761	0.4761	142.674	< 0.001	***
tRNA	49	29.0924	0.5937	177.908	< 0.001	***
PF Mitigation Approach : PD Mitigation Approach	1	0.0839	0.0839	25.1473	< 0.001	***
PF Mitigation Approach : tRNA	49	5.6627	0.1156	34.6288	< 0.001	***
PD Mitigation Approach : tRNA	49	0.347	0.0071	2.1223	< 0.001	***
PF Mitigation Approach : PD Mitigation Approach : tRNA	49	0.2432	0.005	1.4875	0.023	*

## Sheet: Sheet3
PD Mitigation Approach	tRNA	Difference in EMM (ALKB - SS)	Degree of Freedom	t-Statistic	Naïve P-Value	Adjusted P-Value	Sigificant Code
ExoI	Ala-GGC-1	-0.307452	398	-6.51822	2.15746e-10	5.01735e-10	***
GE	Ala-GGC-1	-0.31555	398	-6.6899	7.59385e-11	1.85216e-10	***
ExoI	Ala-TGC-1	-0.134856	398	-2.85906	0.00447251	0.00688079	**
GE	Ala-TGC-1	-0.13387	398	-2.83815	0.00476994	0.00722719	**
ExoI	Arg-ACG-1	-0.785138	398	-16.6455	1.34722e-47	1.34722e-45	***
GE	Arg-ACG-1	-0.720876	398	-15.2831	8.09385e-42	4.04693e-40	***
ExoI	Arg-CCG-1	-0.072166	398	-1.52998	0.126817	0.162586	Not Significant
GE	Arg-CCG-1	-0.0542296	398	-1.14971	0.250954	0.298754	Not Significant
ExoI	Arg-CCT-1	-0.464825	398	-9.85464	1.20644e-20	8.04292e-20	***
GE	Arg-CCT-1	-0.453537	398	-9.61534	8.07338e-20	4.74905e-19	***
ExoI	Arg-TCT-1	-0.649471	398	-13.7693	1.49803e-35	2.98483e-34	***
GE	Arg-TCT-1	-0.610676	398	-12.9468	3.07339e-32	3.84173e-31	***
ExoI	Asn-GTT-1	-0.408715	398	-8.66508	1.14795e-16	5.21797e-16	***
GE	Asn-GTT-1	-0.353285	398	-7.48991	4.49008e-13	1.32061e-12	***
ExoI	Asp-GTC-1	-0.336713	398	-7.13858	4.50454e-12	1.21744e-11	***
GE	Asp-GTC-1	-0.363139	398	-7.69883	1.0974e-13	3.42938e-13	***
ExoI	Cys-GCA-1	-0.00849478	398	-0.180096	0.857169	0.957671	Not Significant
GE	Cys-GCA-1	-0.00821024	398	-0.174064	0.861904	0.957671	Not Significant
ExoI	fMet-CAT-1	-0.0617278	398	-1.30868	0.191399	0.238283	Not Significant
GE	fMet-CAT-1	-0.0656153	398	-1.3911	0.164973	0.208827	Not Significant
ExoI	fMet-CAT-2	-0.0774413	398	-1.64181	0.101418	0.133445	Not Significant
GE	fMet-CAT-2	-0.0916049	398	-1.9421	0.0528307	0.0733759	Not Significant
ExoI	Gln-CTG-1	-0.35845	398	-7.59942	2.15285e-13	6.5238e-13	***
GE	Gln-CTG-1	-0.332152	398	-7.04187	8.3769e-12	2.14792e-11	***
ExoI	Gln-TTG-1	-0.406743	398	-8.62327	1.56242e-16	6.51007e-16	***
GE	Gln-TTG-1	-0.42409	398	-8.99103	1.00443e-17	5.58019e-17	***
ExoI	Glu-TTC-1	-0.224994	398	-4.77005	2.58927e-06	4.97937e-06	***
GE	Glu-TTC-1	-0.220695	398	-4.6789	3.95894e-06	7.4697e-06	***
ExoI	Gly-CCC-1	-0.417151	398	-8.84392	3.03785e-17	1.59887e-16	***
GE	Gly-CCC-1	-0.252761	398	-5.35873	1.42201e-07	2.90205e-07	***
ExoI	Gly-GCC-1	-0.396107	398	-8.39776	8.09809e-16	2.99929e-15	***
GE	Gly-GCC-1	-0.330972	398	-7.01686	9.82499e-12	2.45625e-11	***
ExoI	Gly-TCC-1	-0.462441	398	-9.80411	1.8064e-20	1.129e-19	***
GE	Gly-TCC-1	-0.523767	398	-11.1043	3.86196e-25	3.51087e-24	***
ExoI	His-GTG-1	-0.396935	398	-8.41534	7.13093e-16	2.74266e-15	***
GE	His-GTG-1	-0.290577	398	-6.16047	1.77694e-09	3.70196e-09	***
ExoI	Ile-GAT-1	-0.000280267	398	-0.00594188	0.995262	1	Not Significant
GE	Ile-GAT-1	-0.00113919	398	-0.0241516	0.980744	1	Not Significant
ExoI	Ile2-CAT-1	-0.0447291	398	-0.948292	0.343556	0.399484	Not Significant
GE	Ile2-CAT-1	-0.0267057	398	-0.566181	0.57159	0.649534	Not Significant
ExoI	Ile2-CAT-2	1.11022e-16	398	2.35376e-15	1	1	Not Significant
GE	Ile2-CAT-2	-3.24393e-16	398	-6.87739e-15	1	1	Not Significant
ExoI	Leu-CAA-1	-0.128472	398	-2.72371	0.00673969	0.0099113	**
GE	Leu-CAA-1	-0.0615042	398	-1.30394	0.193009	0.238283	Not Significant
ExoI	Leu-CAG-1	-0.582076	398	-12.3405	7.54005e-30	8.37783e-29	***
GE	Leu-CAG-1	-0.557758	398	-11.8249	7.41043e-28	7.41043e-27	***
ExoI	Leu-CAG-2	-0.473287	398	-10.034	2.8496e-21	2.03543e-20	***
GE	Leu-CAG-2	-0.297361	398	-6.30427	7.69787e-10	1.74952e-09	***
ExoI	Leu-GAG-1	-0.343018	398	-7.27226	1.89136e-12	5.25377e-12	***
GE	Leu-GAG-1	-0.160135	398	-3.39498	0.000755322	0.00121826	**
ExoI	Leu-TAA-1	-0.0800285	398	-1.69667	0.0905416	0.120722	Not Significant
GE	Leu-TAA-1	-0.0338893	398	-0.71848	0.472883	0.543544	Not Significant
ExoI	Leu-TAG-1	-0.334319	398	-7.08783	6.24308e-12	1.64292e-11	***
GE	Leu-TAG-1	-0.291672	398	-6.18366	1.5542e-09	3.30681e-09	***
ExoI	Lys-TTT-1	-0.64618	398	-13.6995	2.88014e-35	4.11449e-34	***
GE	Lys-TTT-1	-0.671975	398	-14.2464	1.66666e-37	4.16666e-36	***
ExoI	Met-CAT-1	-0.147768	398	-3.1328	0.00185955	0.00290554	**
GE	Met-CAT-1	-0.156329	398	-3.3143	0.00100291	0.00159192	**
ExoI	Phe-GAA-1	-0.238981	398	-5.06658	6.21205e-07	1.24241e-06	***
GE	Phe-GAA-1	-0.0479191	398	-1.01592	0.310284	0.36504	Not Significant
ExoI	Phe-GAA-2	-0.391836	398	-8.30722	1.55491e-15	5.55325e-15	***
GE	Phe-GAA-2	-0.0601339	398	-1.27489	0.203094	0.247675	Not Significant
ExoI	Pro-CGG-1	-0.207486	398	-4.39886	1.39885e-05	2.54336e-05	***
GE	Pro-CGG-1	-0.133033	398	-2.8204	0.00503631	0.00751688	**
ExoI	Pro-GGG-1	-0.225971	398	-4.79076	2.34904e-06	4.60596e-06	***
GE	Pro-GGG-1	-0.179124	398	-3.79757	0.000168914	0.000286294	***
ExoI	Pro-TGG-1	-0.487717	398	-10.34	2.35048e-22	1.95874e-21	***
GE	Pro-TGG-1	-0.481059	398	-10.1988	7.47209e-22	5.74776e-21	***
ExoI	SeC-TCA-1	-2.77556e-16	398	-5.8844e-15	1	1	Not Significant
GE	SeC-TCA-1	-8.36137e-16	398	-1.77267e-14	1	1	Not Significant
ExoI	Ser-CGA-1	-0.165295	398	-3.50439	0.000509673	0.00083553	***
GE	Ser-CGA-1	-0.0556851	398	-1.18057	0.23848	0.287326	Not Significant
ExoI	Ser-GCT-1	-0.170981	398	-3.62493	0.000326538	0.00054423	***
GE	Ser-GCT-1	-0.105952	398	-2.24626	0.0252351	0.0355424	*
ExoI	Ser-GGA-1	-0.402854	398	-8.54082	2.861e-16	1.1444e-15	***
GE	Ser-GGA-1	-0.363578	398	-7.70814	1.02994e-13	3.32238e-13	***
ExoI	Ser-TGA-1	-0.385544	398	-8.17383	4.03022e-15	1.38973e-14	***
GE	Ser-TGA-1	-0.11433	398	-2.42389	0.0158	0.0225714	*
ExoI	Thr-CGT-1	-0.118137	398	-2.5046	0.0126578	0.0183447	*
GE	Thr-CGT-1	-0.212106	398	-4.4968	9.06174e-06	1.6781e-05	***
ExoI	Thr-CGT-2	-6.66134e-16	398	-1.41226e-14	1	1	Not Significant
GE	Thr-CGT-2	-1.70003e-16	398	-3.60419e-15	1	1	Not Significant
ExoI	Thr-GGT-1	-0.416491	398	-8.82993	3.37289e-17	1.68645e-16	***
GE	Thr-GGT-1	-0.415963	398	-8.81874	3.66711e-17	1.74624e-16	***
ExoI	Thr-GGT-2	-0.295392	398	-6.26255	9.82774e-10	2.18394e-09	***
GE	Thr-GGT-2	-0.308924	398	-6.54942	1.78725e-10	4.25535e-10	***
ExoI	Thr-TGT-1	-0.406969	398	-8.62806	1.50823e-16	6.51007e-16	***
GE	Thr-TGT-1	-0.384501	398	-8.15172	4.71475e-15	1.57158e-14	***
ExoI	Trp-CCA-1	-0.200317	398	-4.24687	2.70144e-05	4.65765e-05	***
GE	Trp-CCA-1	-0.0905381	398	-1.91948	0.0556384	0.076217	Not Significant
ExoI	Tyr-GTA-1	-0.200539	398	-4.25158	2.6477e-05	4.64509e-05	***
GE	Tyr-GTA-1	-0.0810624	398	-1.71858	0.0864676	0.116848	Not Significant
ExoI	Tyr-GTA-2	-0.201956	398	-4.28161	2.32805e-05	4.15723e-05	***
GE	Tyr-GTA-2	-0.0747125	398	-1.58396	0.113996	0.148047	Not Significant
ExoI	Val-GAC-1	-0.00288478	398	-0.0611595	0.951263	1	Not Significant
GE	Val-GAC-1	-0.00051747	398	-0.0109708	0.991252	1	Not Significant
ExoI	Val-GAC-2	-0.710215	398	-15.0571	7.17438e-41	2.39146e-39	***
GE	Val-GAC-2	-0.648573	398	-13.7502	1.7909e-35	2.98483e-34	***
ExoI	Val-TAC-1	-0.292297	398	-6.19692	1.43945e-09	3.12924e-09	***
GE	Val-TAC-1	-0.344712	398	-7.30816	1.49515e-12	4.27186e-12	***
