# Supplementary material for: Gel-free library preparation for next-generation RNA sequencing and small RNA quantification
Source: Research Square preprint supplement (doi:10.21203/rs.3.rs-7256873/v1), 2025-10-08
Supplement: Supplementary file 11 [file fd984f7d6db3e3a4932c894a.xlsx]

## Sheet: Sheet1
Sample ID	Biological Replicate	Protocol	PF Mitigation Approach	PD Mitigation Approach	Insert Size	Quality-Filtered Read Count	Quality-Filtered Read Proportion
D23-12986	A	V1	ALKB	GE	0	320506	0.056
D23-12986	A	V1	ALKB	GE	1	94574	0.016
D23-12986	A	V1	ALKB	GE	2	870306	0.152
D23-12986	A	V1	ALKB	GE	3	108690	0.019
D23-12986	A	V1	ALKB	GE	4	168145	0.029
D23-12986	A	V1	ALKB	GE	5-10	1184203	0.206
D23-12986	A	V1	ALKB	GE	>10	2999667	0.522
D23-12987	A	V2	SS	GE	0	207282	0.106
D23-12987	A	V2	SS	GE	1	143493	0.073
D23-12987	A	V2	SS	GE	2	755685	0.387
D23-12987	A	V2	SS	GE	3	180836	0.092
D23-12987	A	V2	SS	GE	4	47549	0.024
D23-12987	A	V2	SS	GE	5-10	241112	0.124
D23-12987	A	V2	SS	GE	>10	380279	0.194
D23-12988	A	V3	ALKB	EXOI	0	146313	0.068
D23-12988	A	V3	ALKB	EXOI	1	13360	0.006
D23-12988	A	V3	ALKB	EXOI	2	56538	0.026
D23-12988	A	V3	ALKB	EXOI	3	36132	0.017
D23-12988	A	V3	ALKB	EXOI	4	65486	0.03
D23-12988	A	V3	ALKB	EXOI	5-10	176067	0.082
D23-12988	A	V3	ALKB	EXOI	>10	1664732	0.771
D23-12989	A	V4	SS	EXOI	0	14571	0.007
D23-12989	A	V4	SS	EXOI	1	16589	0.008
D23-12989	A	V4	SS	EXOI	2	200801	0.099
D23-12989	A	V4	SS	EXOI	3	103660	0.051
D23-12989	A	V4	SS	EXOI	4	74054	0.036
D23-12989	A	V4	SS	EXOI	5-10	280765	0.138
D23-12989	A	V4	SS	EXOI	>10	1347990	0.661
D23-12990	B	V1	ALKB	GE	0	10177	0.007
D23-12990	B	V1	ALKB	GE	1	16599	0.012
D23-12990	B	V1	ALKB	GE	2	357080	0.25
D23-12990	B	V1	ALKB	GE	3	61431	0.043
D23-12990	B	V1	ALKB	GE	4	104146	0.073
D23-12990	B	V1	ALKB	GE	5-10	385026	0.269
D23-12990	B	V1	ALKB	GE	>10	493990	0.346
D23-12991	B	V2	SS	GE	0	2582	0.002
D23-12991	B	V2	SS	GE	1	3560	0.002
D23-12991	B	V2	SS	GE	2	208743	0.145
D23-12991	B	V2	SS	GE	3	801250	0.558
D23-12991	B	V2	SS	GE	4	85122	0.059
D23-12991	B	V2	SS	GE	5-10	204254	0.142
D23-12991	B	V2	SS	GE	>10	132363	0.092
D23-12992	B	V3	ALKB	EXOI	0	15638	0.008
D23-12992	B	V3	ALKB	EXOI	1	24319	0.012
D23-12992	B	V3	ALKB	EXOI	2	590501	0.29
D23-12992	B	V3	ALKB	EXOI	3	76929	0.038
D23-12992	B	V3	ALKB	EXOI	4	145772	0.071
D23-12992	B	V3	ALKB	EXOI	5-10	435660	0.214
D23-12992	B	V3	ALKB	EXOI	>10	745972	0.367
D23-12993	B	V4	SS	EXOI	0	99266	0.046
D23-12993	B	V4	SS	EXOI	1	37230	0.017
D23-12993	B	V4	SS	EXOI	2	121269	0.057
D23-12993	B	V4	SS	EXOI	3	32876	0.015
D23-12993	B	V4	SS	EXOI	4	43329	0.02
D23-12993	B	V4	SS	EXOI	5-10	156330	0.073
D23-12993	B	V4	SS	EXOI	>10	1659262	0.772
D23-12994	C	V1	ALKB	GE	0	10269	0.005
D23-12994	C	V1	ALKB	GE	1	15859	0.009
D23-12994	C	V1	ALKB	GE	2	373486	0.196
D23-12994	C	V1	ALKB	GE	3	48369	0.025
D23-12994	C	V1	ALKB	GE	4	73534	0.039
D23-12994	C	V1	ALKB	GE	5-10	457971	0.24
D23-12994	C	V1	ALKB	GE	>10	927009	0.486
D23-12995	C	V2	SS	GE	0	2602	0.002
D23-12995	C	V2	SS	GE	1	3828	0.002
D23-12995	C	V2	SS	GE	2	225566	0.134
D23-12995	C	V2	SS	GE	3	834264	0.497
D23-12995	C	V2	SS	GE	4	82405	0.049
D23-12995	C	V2	SS	GE	5-10	214081	0.128
D23-12995	C	V2	SS	GE	>10	315575	0.188
D23-12996	C	V3	ALKB	EXOI	0	95560	0.06
D23-12996	C	V3	ALKB	EXOI	1	13982	0.009
D23-12996	C	V3	ALKB	EXOI	2	37553	0.024
D23-12996	C	V3	ALKB	EXOI	3	45628	0.029
D23-12996	C	V3	ALKB	EXOI	4	112594	0.071
D23-12996	C	V3	ALKB	EXOI	5-10	335756	0.212
D23-12996	C	V3	ALKB	EXOI	>10	941852	0.595
D23-12997	C	V4	SS	EXOI	0	2155	0.001
D23-12997	C	V4	SS	EXOI	1	4151	0.003
D23-12997	C	V4	SS	EXOI	2	209753	0.135
D23-12997	C	V4	SS	EXOI	3	622453	0.401
D23-12997	C	V4	SS	EXOI	4	91658	0.059
D23-12997	C	V4	SS	EXOI	5-10	238477	0.154
D23-12997	C	V4	SS	EXOI	>10	383172	0.247
