# Supplementary figures and images for: Gel-free library preparation for next-generation RNA sequencing and small RNA quantification
Source: Research Square preprint supplement (doi:10.21203/rs.3.rs-7256873/v1), 2025-10-08

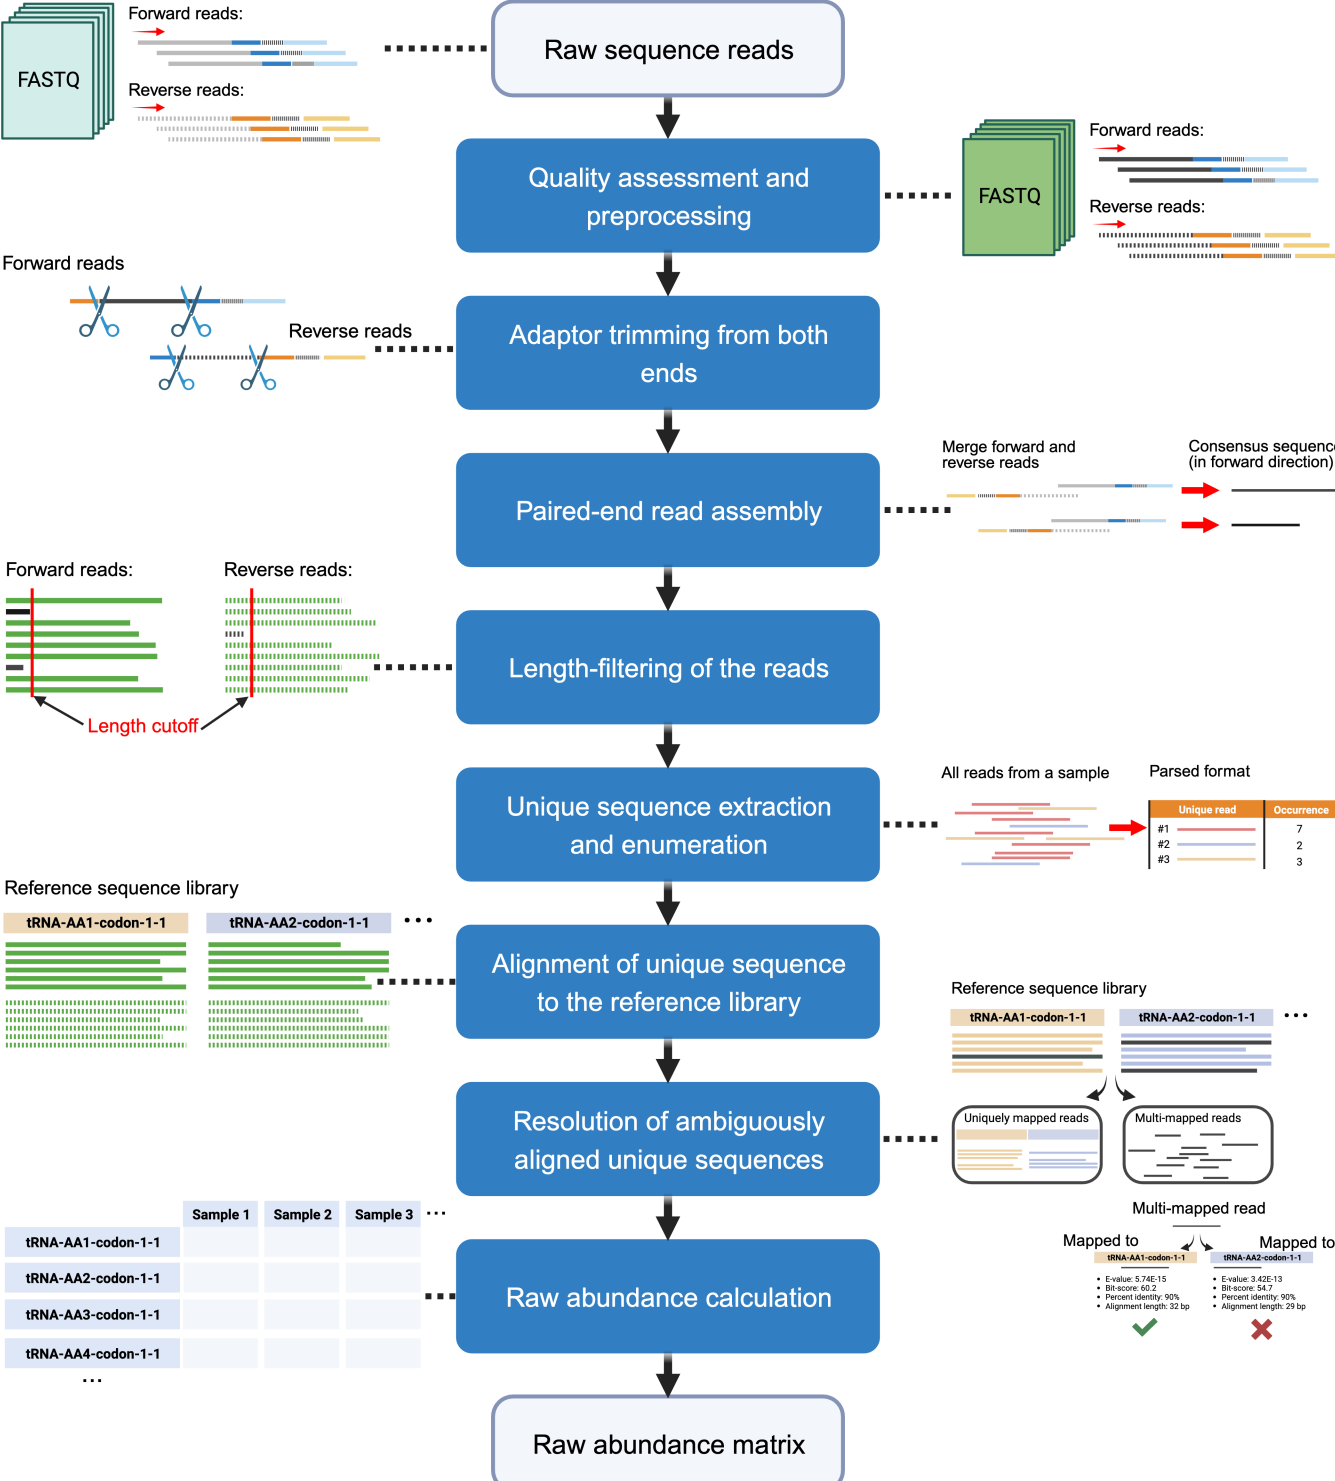

Supplement: Supplementary file 2 [file d335e5f689c27168a01ddbb7.pdf]
